# Supplementary material for: Sustainable continuous flow synthesis of β-aminocarbonyls via acid-catalyzed hydration of N-Boc-2-azetines
Source: Royal Society of Chemistry journal article supplement (doi:10.1039/d3re00342f), 2023-01-01
Supplement: d3re00342f1.pdf [file d3re00342f1.pdf]

# Sustainable continuous flow synthesis of $\beta$ -aminocarbonyls via acid-catalyzed hydration of N-Boc-2-azetines

## Supporting information

Michael Andresini,<sup>a</sup> Marco Colella,<sup>a</sup> Roberta Savina Dibeneditto,<sup>a</sup> Elena Graziano,<sup>a</sup> Giuseppe Romanazzi,<sup>b</sup>  
Andrea Aramini,<sup>c</sup> Leonardo Degennaro,<sup>a,\*</sup> Renzo Luisi<sup>a,\*</sup>

<sup>a</sup>FLAME-Lab, Flow Chemistry and Microreactor Technology Laboratory Department of Pharmacy– Drug Sciences  
University of Bari “A. Moro” Via E. Orabona 4 – 70125 Bari, Italy. <sup>b</sup>DICATECh, Politecnico di Bari, Bari, 70125, Italy.

<sup>c</sup>Department of Discovery, Dompé Farmaceutici S.p.A., Via Campo di Pile, L’Aquila I-67100, Italy.

e-mail: leonardo.degennaro@uniba.it; renzo.luisi@uniba.it

## Table of contents

|                                                                                                                 |         |
|-----------------------------------------------------------------------------------------------------------------|---------|
| 1. General information                                                                                          | S2      |
| 2. Azetines collection                                                                                          | S3      |
| 2.1 General procedure for the preparation of 2-substituted N-Boc-2-azetines 2b-2z (GP1)                         | S3      |
| 2.2 Characterization of unreported 2-substituted N-Boc-2-azetines                                               | S4-S5   |
| 3. General procedures                                                                                           |         |
| 3.1 General procedure for the oxalic acid-promoted ring opening of 2-azetines in batch (GP2)                    | S6      |
| 3.2 Gram-scale synthesis of 4a and 4b                                                                           | S6      |
| 3.3 General procedure for the HCl <sub>(aq)</sub> -promoted ring opening of 2-azetines in continuous flow (GP3) | S7      |
| 3.4 Procedure for the 2.0 mmol-scale continuous flow preparation of $\beta$ -aminocarbonyl 4b                   | S8      |
| 4. Mechanistic investigations on the acid-promoted ring opening of 2-azetines                                   | S9      |
| 4.1 Ring Opening Studies on 2a - Formation of the emiaminal intermediate 3                                      | S9-S10  |
| 4.2 Ring Opening Studies on 2d - Assessing the role of acid catalyst and water                                  | S10-S11 |
| 5. Calculation of Green Metrics                                                                                 | S12     |
| 7. Characterization of products 4a-z                                                                            | S14-S20 |
| 8. Copy of NMR spectra                                                                                          | S21-S51 |
| 9. References                                                                                                   | S52     |

## 1. General information

All the chemicals were purchased from Alfa Aesar, Sigma-Aldrich, Fluorochem, and TCI Europe, and used without further purification. An Agilent 500 spectrometer (with frequencies of 500 MHz for  $^1\text{H}$ , 126 MHz for  $^{13}\text{C}$ , and 470 MHz for  $^{19}\text{F}$ ), and a Bruker Ascend 400 spectrometer (with frequencies of 101 MHz for  $^{13}\text{C}$ , and 377 MHz for  $^{19}\text{F}$ ) were used to record the  $^1\text{H}$ ,  $^{13}\text{C}$ , and  $^{19}\text{F}$  NMR spectra, which were reported in parts per million (ppm) relative to residual  $\text{CHCl}_3$  ( $^1\text{H}$ :  $\delta = 7.26$  ppm) and relative to  $\text{CDCl}_3$  ( $^{13}\text{C}$ :  $\delta = 77.16$  ppm). The signals' multiplicity was indicated by s (singlet), d (doublet), t (triplet), q (quartet), quin (quintet), bs (broad signal), or m (multiplet), and spin-spin coupling constants ( $J$ ) were given in Hz. To ensure complete and unambiguous assignment of resonances, 2D NMR techniques (i.e. HSQC and COSY experiments) were combined. NOESY experiments were performed for structural evaluations of the products. The NMR spectra of azetines were recorded with  $\text{CDCl}_3$  treated with solid  $\text{K}_2\text{CO}_3$  to minimize decomposition. PerkinElmer 283 spectrometer was used to obtain the infrared spectra, while high-resolution mass spectrometry (HRMS) spectra were recorded using the Agilent 6530 accurate mass Q-TOF instrument and Excalibur data system. Flash column chromatography was performed using 230-400 mesh silica under the reported conditions for each compound and using standard techniques, and solutions were concentrated under reduced pressure with a rotary evaporator. Thin layer chromatography (TLC) was conducted using aluminum sheets precoated with silica gel 60F254 (Merck), and the spots were visualized under UV light ( $\lambda = 254$  nm) or by oxidation with  $\text{KMnO}_4$  (aq.).

## Flow equipment

The customized flow microreactor system was assembled using a peek T-shaped micromixer with an inner volume of 500  $\mu\text{L}$  and PTFE microtube ( $\phi = 1$  mm) reactors and loops were used. The microtubes were cut to the required length and connected to the micromixers using peek fittings. Harvard PHD 2000 syringe pumps equipped with gastight syringes were used to inject the reaction components into the flow microreactor system. A Gilson Miniplus3 peristaltic pump was used for the inline recycle of the aqueous acidic solution. For the inline liquid-liquid extraction a Zaiput SEP-10 device equipped with a hydrophobic PTFE OB-900 pore size membrane was employed. The reactor was kept at the desired temperature with a heated bath and a hotplate equipped with a temperature probe.

## 2. Azetines collection

Azetine **2a** was prepared according to the reported procedure.<sup>1</sup> 2-Substituted *N*-Boc-2-azetines **2b-2z** were prepared according to our previously reported flow procedure (**GP1**)<sup>2</sup> unless otherwise specified. The 2,3-substituted *N*-Boc-2-azetine **2v** was synthesized starting from *tert*-Butyl 3-methoxy-3-phenylazetidine-1-carboxylate<sup>3</sup> according to the reported continuous flow method.<sup>4</sup>

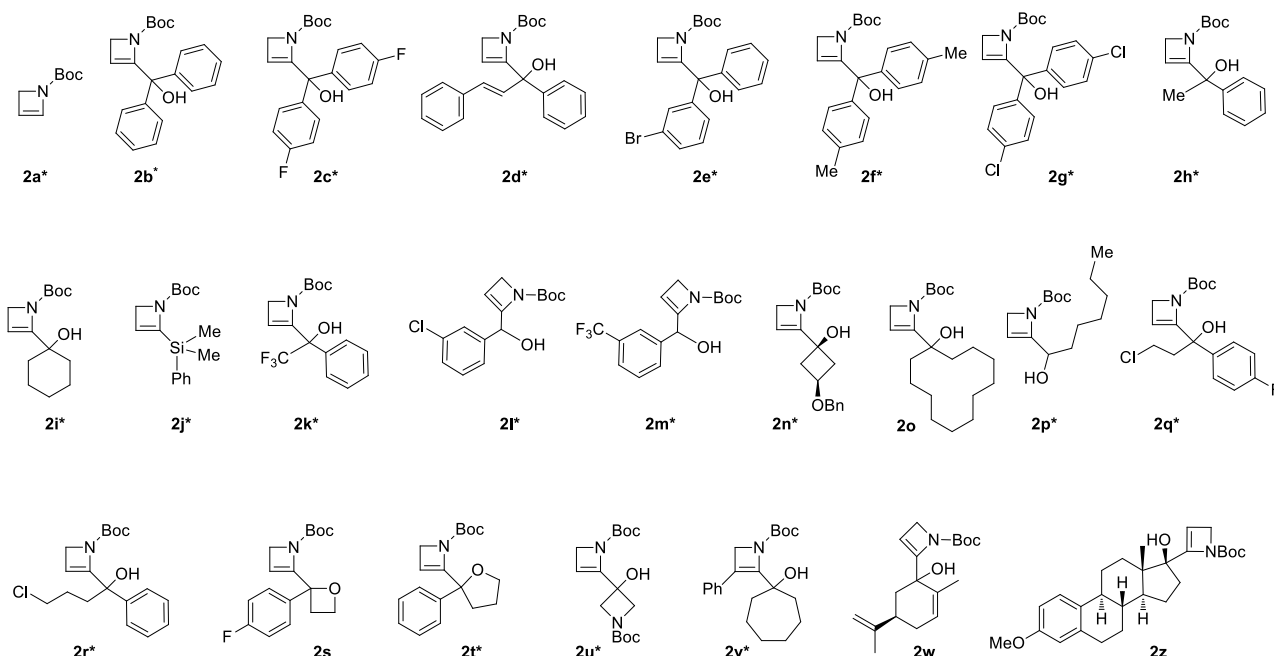

\*data consistent with literature<sup>2,4</sup>

**Scheme S1.** List of utilized 2-substituted *N*-Boc-2-azetines.

### 2.1 General procedure for the preparation of 2-substituted *N*-Boc-2-azetines **2b-2z** (**GP1**)<sup>2</sup>

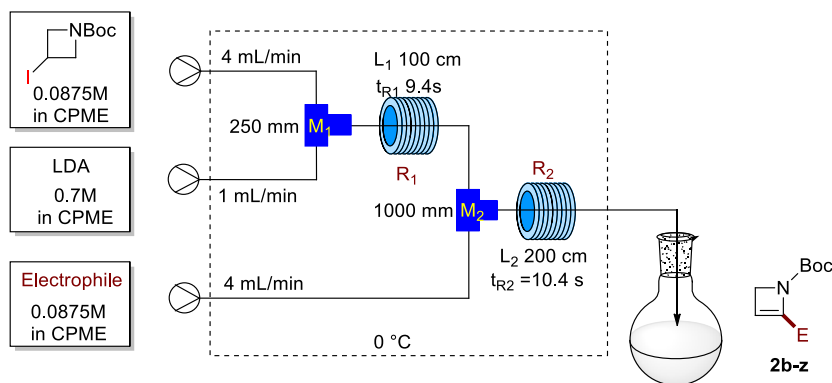

The used flow system made of two T-shaped micromixers (**M1**, **M2**), two microtube reactors (**R1**, **R2**), and three tube precooling units (**P1**, **P2** and **P3**) was dipped in a cooling bath at 0 °C. A solution of 1-Boc-3-iodoazetidine (0.0875M in CPME, flow rate: 4 mL/min) and a solution of lithium diisopropylamide (0.7M in CPME, flow rate: 1 mL/min) were introduced into **M1** by means of syringe pumps. The resulting solution passed through the first tubular reactor **R1** (9.4 s) and then introduced to mixer **M2**, where it was mixed with the electrophile. The resulting solution passed through the second reactor **R2** (10.4 s). After reaching the steady state (1 min), the outcoming solution was collected for 3 minutes while being quenched with water.

The reaction mixture was extracted with AcOEt (3 x 5 mL). The combined organic phases were dried over Na<sub>2</sub>SO<sub>4</sub> and the solvent was removed under vacuum. The desired 2-azetine was obtained by washing the reaction crude with hexane/diethyl ether 9:1 (v/v) or after flash column chromatography.

## 2.2 Characterization of unreported 2-substituted N-Boc-2-azetines

### *tert*-butyl 4-(1-hydroxycyclododecyl)azete-1(2*H*)-carboxylate **2o**

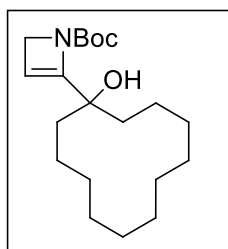

Prepared according to **GP1** with cyclododecanone as electrophile, compound **2o** was obtained as white waxy solid after flash column chromatography (63%, 223 mg, *R<sub>f</sub>* = 0.5, hexane/AcOEt 9:1 + Et<sub>3</sub>N 1%). <sup>1</sup>H NMR (500 MHz, CDCl<sub>3</sub>) δ 5.31 (s, 1H, C=CH), 4.20 (s, 1H, NCH<sub>2</sub>), 1.78 – 1.65 (m, 4H), 1.47 (s 9H, 3 x CH<sub>3</sub>), 1.46 – 1.29 (m, 18H). <sup>13</sup>C{<sup>1</sup>H} NMR (126 MHz, CDCl<sub>3</sub>) δ 156.6, 106.2, 81.2, 71.9, 55.7, 31.5, 26.5, 26.2, 22.7, 22.4, 19.5. IR (film)/cm<sup>-1</sup> 3398, 2930, 2863, 1704, 1673, 1410, 1130, 723. HRMS calcd for C<sub>20</sub>H<sub>35</sub>NNaO<sub>3</sub> [M+Na]<sup>+</sup> 360.2515; found 360.2530.

### *tert*-Butyl 4-(2-(4-fluorophenyl)oxetan-2-yl)azete-1(2*H*)-carboxylate **2s**

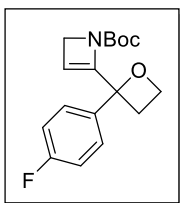

To a solution of *tert*-butyl 4-(3-chloro-1-(4-fluorophenyl)-1-hydroxypropyl)azete-1(2*H*)-carboxylate<sup>2</sup> (0.6 mmol, 205 mg) in THF (6 mL), potassium *tert*-butoxide (1.8 mmol, 202 mg) was added. After stirring for 2 hours, the reaction crude was diluted with water (6 mL). The mixture was extracted with EtOAc (3 x 6 mL) and the combined organic layers were dried over Na<sub>2</sub>SO<sub>4</sub>, filtered and concentrated under reduced pressure. Compound **2r** was obtained as a pale yellow oil (91 %, 167 mg) after flash column chromatography (*R<sub>f</sub>* = 0.4, hexane/AcOEt 8:2 + Et<sub>3</sub>N 1%). <sup>1</sup>H NMR (500 MHz, CDCl<sub>3</sub>) δ 7.58 – 7.5 (m, 2H, Ar-H), 7.06 (t, *J* = 8.8 Hz, 2H, Ar-H), 5.59 (s, 1H, C=CH), 4.74 (ddd, *J* = 8.6, 7.0, 5.9 Hz, 1H, OCH<sub>2</sub>), 4.59 (dt, *J* = 8.8, 6.1 Hz, 1H, OCH<sub>2</sub>), 4.33 – 4.21 (m, 2H, NCH<sub>2</sub>), 3.31 – 3.21 (m, 1H, OCH<sub>2</sub>CH<sub>2</sub>), 2.95 – 2.85 (m, 1H, OCH<sub>2</sub>CH<sub>2</sub>), 1.31 (s, 9H, 3 x CH<sub>3</sub>). <sup>13</sup>C{<sup>1</sup>H} NMR (126 MHz, CDCl<sub>3</sub>) δ 162.4 (d, <sup>1</sup>*J*<sub>CF</sub> = 246.2 Hz), 152.8, 151.4, 138.8 (d, <sup>4</sup>*J*<sub>CF</sub> = 3.2 Hz), 127.6 (d, <sup>3</sup>*J*<sub>CF</sub> = 8.2 Hz), 115.0 (d, <sup>2</sup>*J*<sub>CF</sub> = 21.5 Hz), 108.7, 83.7, 80.5, 66.3, 55.1, 33.6, 28.4. <sup>19</sup>F NMR (470 MHz, CDCl<sub>3</sub>) δ -117.50 (s). IR (film)/cm<sup>-1</sup> 2917, 1704, 1602, 1508, 1392.1367, 1232, 1149, 964, 833, 672. HRMS calcd for C<sub>17</sub>H<sub>20</sub>FNNaO<sub>3</sub> [M+Na]<sup>+</sup> 328.1325; found 328.1339.

### *tert*-Butyl 4-((5*R*)-1-hydroxy-2-methyl-5-(prop-1-en-2-yl)cyclohex-2-en-1-yl)azete-1(2*H*)-carboxylate **2w**

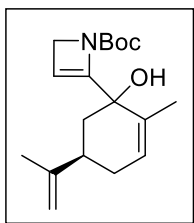

Prepared according to **GP1** with (*R*)-carvone as electrophile, compound **2v** was obtained as white waxy solid (50 %, 160 mg, dr > 95:5, absolute stereochemistry not assigned) after flash column chromatography (*R<sub>f</sub>* = 0.5, hexane/Et<sub>2</sub>O 9:1 + Et<sub>3</sub>N 1%), [α]<sub>D</sub><sup>20</sup> = -97.8° (*c* = 1, CHCl<sub>3</sub>). <sup>1</sup>H NMR (500 MHz, CDCl<sub>3</sub>) 5.67 – 5.60 (m, 1H, C=CHCH<sub>2</sub>CH), 5.27 (s, 1H, NC=CH), 4.73 – 4.69 (m, 2H, C=CH<sub>2</sub>), 4.24 - 4.17 (m, 2H, NCH<sub>2</sub>), 2.26 – 2.22 (m, 1H, cyclohexenyl-CH<sub>2</sub>), 2.14 – 2.06 (m, 1H, cyclohexenyl-CH<sub>2</sub>), 1.96 – 1.87 (m, 1H, cyclohexenyl-CH<sub>2</sub>), 1.81 – 1.78 (m, 3H, CH<sub>3</sub>), 1.71 (s, 3H, CH<sub>3</sub>), 1.48 (s, 9H, C(CH<sub>3</sub>)<sub>3</sub>). <sup>13</sup>C{<sup>1</sup>H} NMR (126 MHz, CDCl<sub>3</sub>) δ 153.9, 148.9, 133.5, 128.4, 126.5, 109.2, 108.1, 81.4, 72.3, 55.2, 40.3, 39.0, 31.2, 28.5, 20.7, 18.4. IR (film)/cm<sup>-1</sup> 3353, 2975, 2924, 1669, 1415, 1368, 1204, 1158, 1131, 1038, 1022, 861, 765. HRMS calcd for C<sub>18</sub>H<sub>27</sub>NNaO<sub>3</sub> [M+Na]<sup>+</sup> 328.1889; found 328.1892.

**tert-butyl 4-((8*R*,9*S*,13*S*,14*S*,17*S*)-17-hydroxy-3-methoxy-13-methyl-7,8,9,11,12,13,14,15,16,17-decahydro-6*H*-cyclopenta[*a*]phenanthren-17-yl)azete-1(2*H*)-carboxylate 2z**

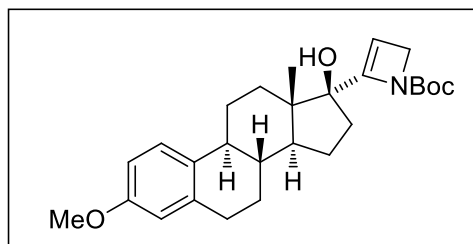

Prepared according to **GP1** with (8*R*,9*S*,13*S*,14*S*)-3-methoxy-13-methyl-6,7,8,9,11,12,13,14,15,16-decahydro-17*H*-cyclopenta[*a*]phenanthren-17-one as electrophile, compound **2z** was obtained as white waxy solid after flash column chromatography (55%, 264 mg, *R*<sub>f</sub> = 0.3, hexane/EtOAc 9:1 + Et<sub>3</sub>N 1%). <sup>1</sup>**H NMR** (500 MHz, CDCl<sub>3</sub>) δ 7.18 (d, *J* = 8.6 Hz, 1H, Ar-H), 6.70 (dd, *J* = 8.6, 2.7 Hz, 1H, Ar-H), 6.62 (d, *J* = 2.4 Hz, 1H, Ar-H), 5.39 (s, 1H), 5.29 (d, *J* = 7.8 Hz, 1H), 4.30 (d, *J* = 11.6 Hz, 1H), 4.22 – 4.17 (m, 2H), 3.77 (s, 3H, OCH<sub>3</sub>), 2.94 – 2.76 (m, 2H), 2.32 – 2.22 (m, 1H), 2.16 – 1.87 (m, 5H), 1.69 – 1.59 (m, 1H), 1.48 (s, 9H, 3 x CH<sub>3</sub>), 1.44 – 1.27 (m, 5H), 0.95 (s, 3H, CH<sub>3</sub>). <sup>13</sup>**C{<sup>1</sup>H}** NMR (126 MHz, CDCl<sub>3</sub>) δ 157.6, 156.7, 138.1, 132.9, 126.5, 114.0, 111.6, 110.2, 107.8, 104.1, 81.8, 55.4, 50.0, 48.2, 43.7, 39.6, 35.1, 32.8, 30.0, 28.5, 27.7, 26.9, 26.7, 23.1, 13.9. **IR** (film)/cm<sup>-1</sup> 3342, 2917, 1669, 1424, 1255, 1162, 1132, 1044, 863. **HRMS** calcd for C<sub>27</sub>H<sub>30</sub>NNaO<sub>4</sub> [M+Na]<sup>+</sup> 462.2620; found 462.2619.

### 3. General procedures

#### 3.1 General procedure for the oxalic acid-promoted ring opening of 2-azetines. Preparation of products **4a-z** (GP2)

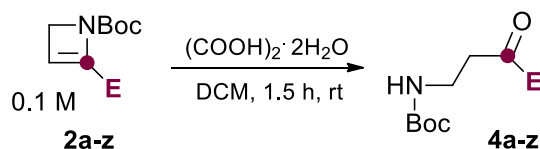

To a stirred solution of azetine **2a-z** (0.25 mmol, 1.0 equiv) in dichloromethane (2.5 mL), oxalic acid dihydrate (0.125 mmol, 0.5 equiv) was added. After 1.5 hours, the reaction mixture was filtered, and the solvent was removed under reduced pressure obtaining the desired products **4a-z** without further purification.

##### *Example:* Synthesis of **4b**

To a stirred solution of azetine **2b** (0.25 mmol, 84 mg, 1.0 equiv) in dichloromethane (2.5 mL), oxalic acid dihydrate (0.125 mmol, 16 mg, 0.5 equiv) was added. After 1.5 hours, the reaction mixture was filtered, and the solvent was removed under reduced pressure obtaining the desired products **4b** without further purification (87 mg, 98%).

#### 3.2 Gram-scale synthesis of **4a** and **4b**

To a stirred solution of azetine **2b** (3.0 mmol, 1.0 equiv) in dichloromethane (30 mL), oxalic acid dihydrate (1.5 mmol, 0.5 equiv) was added. After 1.5 hours, the reaction mixture was filtered, and the solvent was distilled obtaining the desired products **4b** without further purification unless otherwise specified (1043 mg, 98%). The 95% of DCM could be recovered by distillation (37.9 g).

Compound **4a** could be obtained following the same procedure employing azetine **2a**, 3.0 mmol in 30 mL DCM (493 mg, 95%).

### 3.3 General procedure for the continuous flow acid-promoted ring opening of 2-azetines with inline liquid-liquid extraction (GP3).

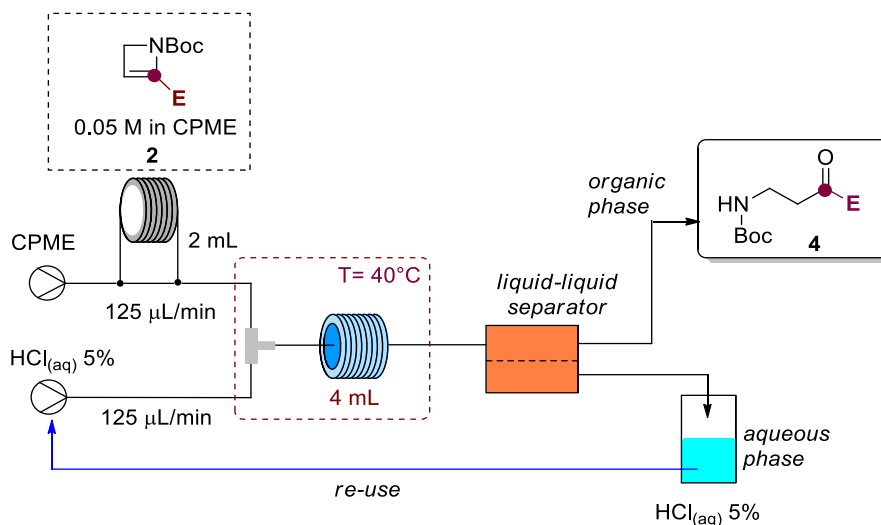

#### Flow set-up

A peek T-shaped micromixer (inner volume = 500  $\mu\text{L}$ ), a PTFE microtube loop ( $\phi = 1$  mm, 2 mL, length = 254 cm) and a PTFE microtube reactor (4 mL,  $\phi = 1$  mm, length = 508 cm) were employed.

The flow microreactor was dipped in a heated bath ( $40^\circ\text{C}$ ). The solution of azetine **2** (0.05 M in CPME) was loaded into the loop (2 mL). The solution of **2** (125  $\mu\text{L}/\text{min}$ ) and the solution of HCl (5% in  $\text{H}_2\text{O}$ , 125  $\mu\text{L}/\text{min}$ ) were delivered into the T-shaped peek micromixer by syringe pumps (solution of **2** was injected by fluxing fresh CPME). The resulting solution passed through  $R_1$  (4 mL, 16 min) and then was introduced to the Zaiput Zaiput SEP-10 device equipped with a hydrophobic PTFE OB-900 pore size membrane. The resulting aqueous and organic phases were collected separately. Evaporation of the organic solvent with a rotary evaporator furnished the desired products **4b**, **4g**, **4h**, **4m**, **4o**, **4t**, **4u**, **4w** and **4z** as described in Section 7.

#### Example: Continuous flow synthesis of **4b**

The flow microreactor was dipped in a heated bath ( $40^\circ\text{C}$ ). The solution of azetine **2b** (0.05 M in CPME, 33.7 mg in 2 mL CPME) was loaded into the loop (2 mL). The solution of **2** (125  $\mu\text{L}/\text{min}$ ) and the solution of HCl (5% in  $\text{H}_2\text{O}$ , 125  $\mu\text{L}/\text{min}$ ) were delivered into the T-shaped peek micromixer by syringe pumps (solution of **2b** was injected by fluxing fresh CPME). The resulting solution passed through  $R_1$  (4 mL, 16 min) and then was introduced to the Zaiput Zaiput SEP-10 device equipped with a hydrophobic PTFE OB-900 pore size membrane. The resulting aqueous and organic phases were collected separately. Evaporation of the organic solvent with a rotary evaporator furnished the desired product **4b** in 98% yield (35 mg).

### 3.4 Continuous flow acid-promoted ring opening of azetidine **2b** with inline liquid-liquid extraction and closed-loop recycle of the acidic solution (2.0 mmol scale).

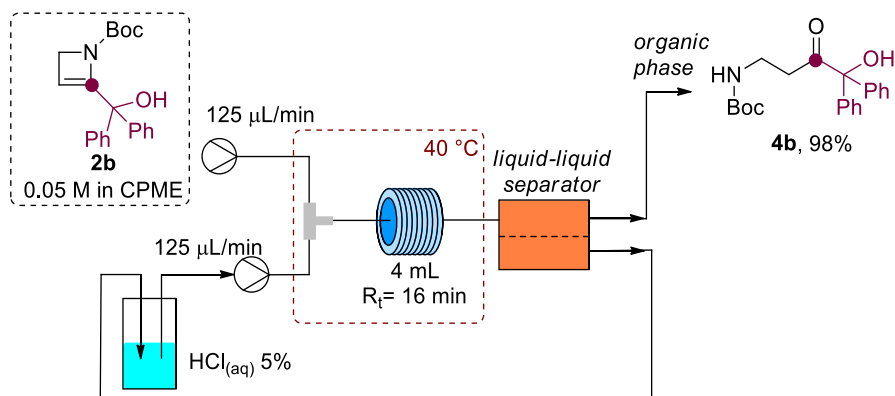

#### Flow set-up

A peek T-shaped micromixer (inner volume = 500  $\mu$ L), a PTFE microtube loop ( $\phi$  = 1 mm, 2 mL, length = 254 cm) and a PTFE microtube reactor (4 mL,  $\phi$  = 1 mm, length = 508 cm) were employed.

The flow microreactor was dipped in a heated bath (40  $^{\circ}$ C). The solution of azetidine **2** (42 mL, 0.05 M in CPME) was delivered into the system using a Harvard PHD 2000 syringe pump (125  $\mu$ L/min) and the solution of HCl (5% in  $H_2O$ , 12 mL) was delivered employing a peristaltic pump (Gilson Miniplus3 pump, 125  $\mu$ L/min). The organic and aqueous solution were mixed into a T-shaped peek mixer (inner volume = 500  $\mu$ L), the resulting segmented flow passed through  $R_1$  (4 mL, 16 min, 40  $^{\circ}$ C) and then introduced to the Zaiput SEP-10 device equipped with a hydrophobic PTFE OB-900 pore size membrane. After 16 minutes from the start of the process, the organic phase was collected in a round bottom flask, while the aqueous solution was reintroduced into the HCl(aq) 5% feedstock through a PTFE microtube. The outcoming organic solution was collected for 320 min (40 mL). Distillation of the organic solvent furnished the desired product **4b** in 98% yield (696 mg). The 99.3% of CPME was recovered by distillation (34.27 g).

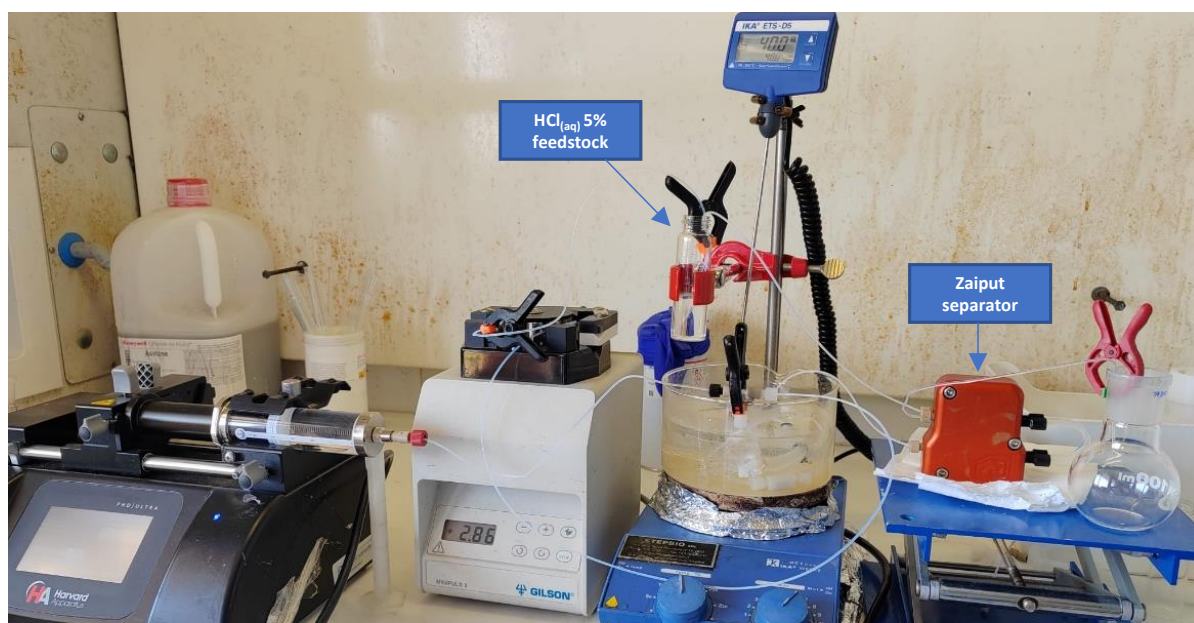

**Figure S1.** Continuous flow set-up – Synthesis of **4b** with direct recycle of HCl(aq) 5% after inline liquid-liquid extraction.



## 4. Mechanistic investigations on the acid-promoted ring opening of 2-azetines

### 4.1 Ring Opening Studies on 2a – Formation of the emiaminal intermediate 3

An NMR tube charged with 2-azetine **2a** (10 mg, 0.06 mmol) in 0.6 mL of CDCl<sub>3</sub> was introduced into a 500 MHz NMR machine with the probe at 25 °C. The first spectrum (t = 0 in Figure S2) was taken soon after the introduction of the sample into the probe. The <sup>1</sup>H NMR spectra were acquired using 8 scans (ns) and 1s relaxation delay (d1) and processed using MestReNova (Version 6.0.2). The reaction was monitored every 30 minutes, and selected spectra (0, 6h, 9h, 12h) reported in Figure S2. After 6h, the NMR spectrum reveals the presence of the product **4a** (labelled in blue) along with the signal of the putative intermediate **3** (labelled in green). After 9h, the signals of the starting azetine **2a** (labelled in red) disappeared resulting in a mixture of intermediate **3** and product **4a**. This mixture was subjected to a HSQC NMR experiment (see Figure S3) that allowed to confirm the identity of intermediate **3**. Complete conversion of **3** into **4** is observed after 12h supporting the hypothesis that **3** is a transient species in this process (Figure S2).

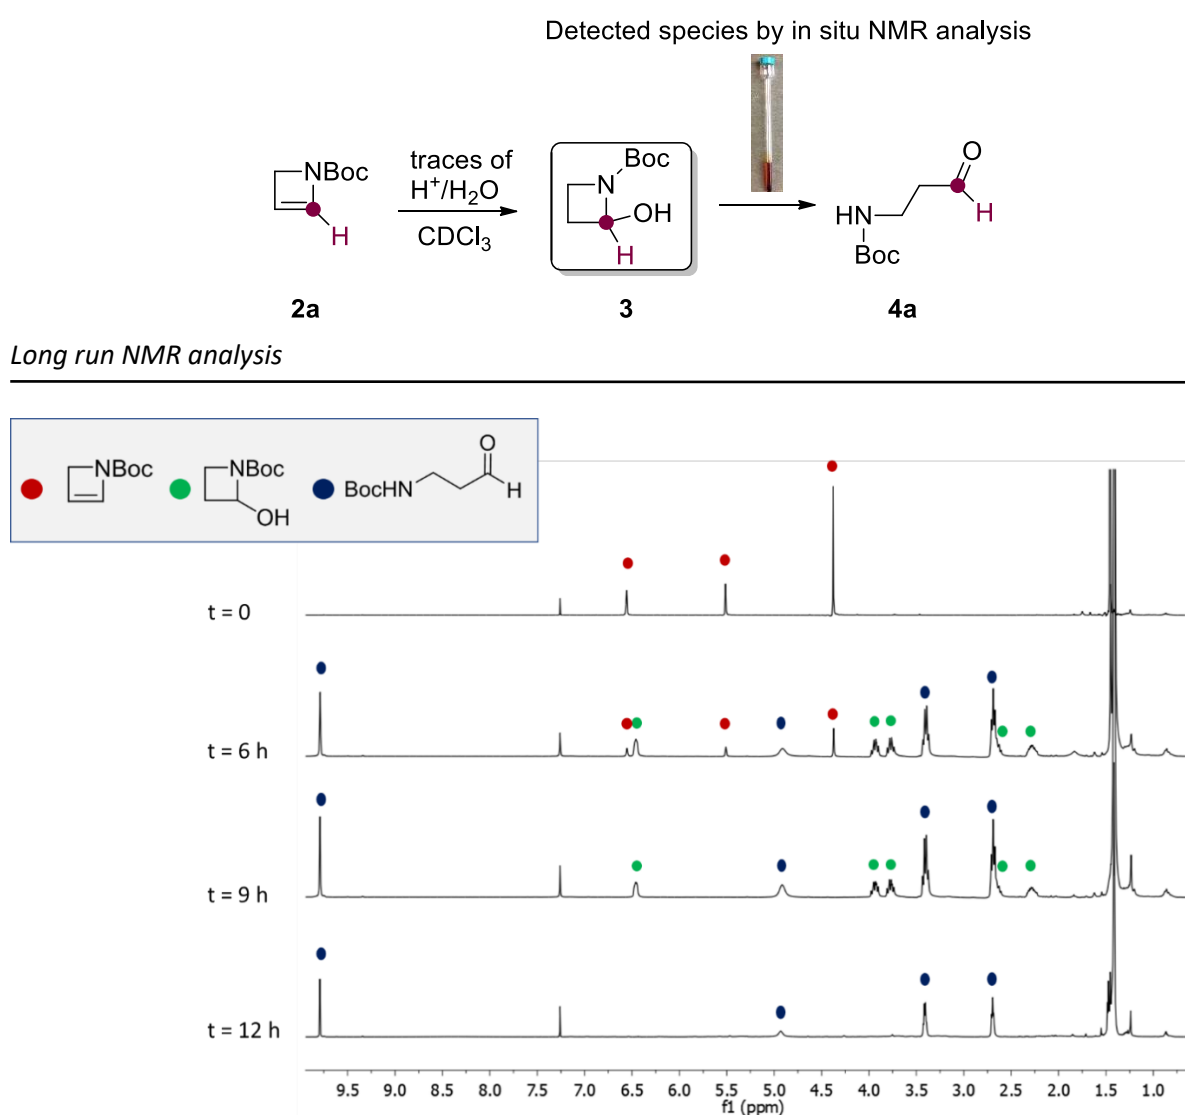

**Figure S2.** Transformation **2a**  $\rightarrow$  **4a** by in situ NMR analysis.

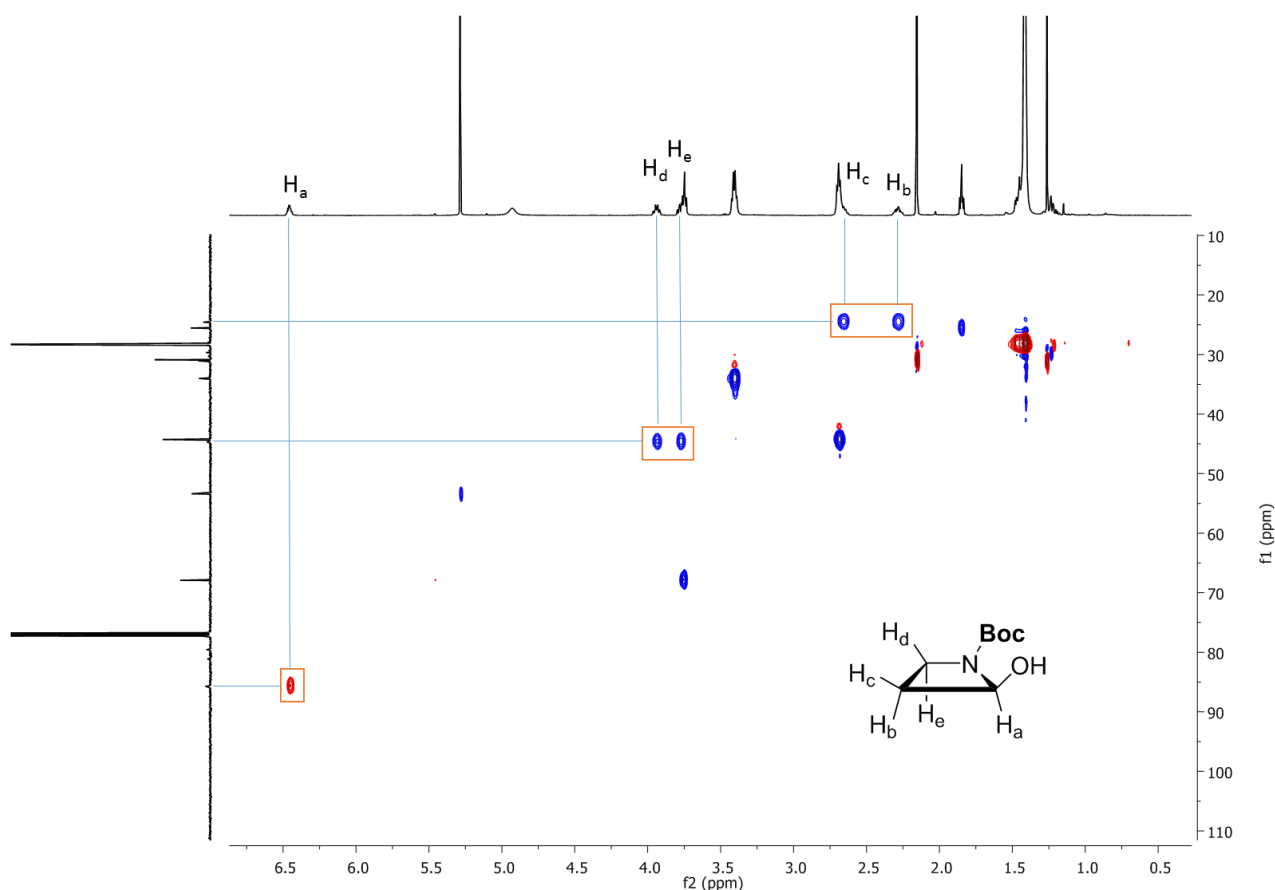

**Figure S3.** 500 MHz HSQC NMR analysis of a mixture **3/4a**.

#### 4.2 Ring Opening Studies on **2b** - Assessing the role of acid catalyst and water

To assess the role of water in the ring-opening reaction, commercial  $\text{CDCl}_3$  was previously dried by treatment with  $\text{CaH}_2$ , filtered and stored under molecular sieves (Figure S4). Residual content of water and acid was removed.

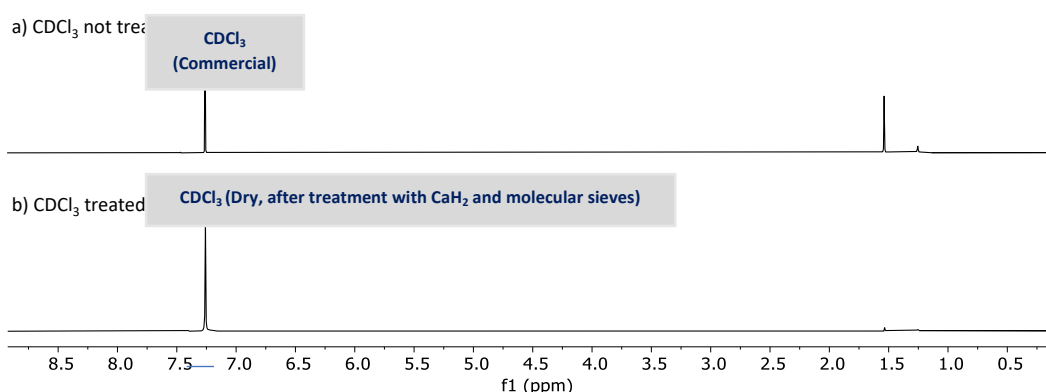

**Figure S4.**  $^1\text{H}$  NMR spectra of commercial (top) and dry (bottom)  $\text{CDCl}_3$ .

An NMR tube was charged with a solution of azetidine **2b** (10 mg, 0.06 mmol) and 0.1 equiv of p-TsOH (0.006 mmol) in dry  $\text{CDCl}_3$ . The sealed tube was introduced in a 500 MHz NMR machine with the probe at 25 °C, and the first spectrum (Figure S5,  $t=0$ ) acquired using 8 scans (ns), 1 s relaxation delay (d1) and processed using MestReNova (Version 6.0.2). The progress of the reaction was executed acquiring a  $^1\text{H}$  NMR spectrum every 30 min. After 72h of acquisition, only negligible changes were observed (Figure S5, a and b) testifying that

the reaction doesn't proceed in the absence of water. Then, 20  $\mu$ L of water were added to the reaction mixture, and recording the spectrum after 2 h we observed the formation of the product **4b** (40% yield, spectrum d). The reaction was monitored up to 4 h but the consumption of the starting material stopped. To access the role of the acid in the reaction, we decided to add an equimolar amount of *p*-TsOH to the reaction mixture (2,6 mg in 0.1 mL of  $\text{CDCl}_3$ ). Recording the spectra every 30 min up to 2 h, after addition of acid, the conversion of the substrate reached 80% (spectrum e). This graphical comparison suggests that equimolar amount of water and acid are mandatory for the success of the reaction.

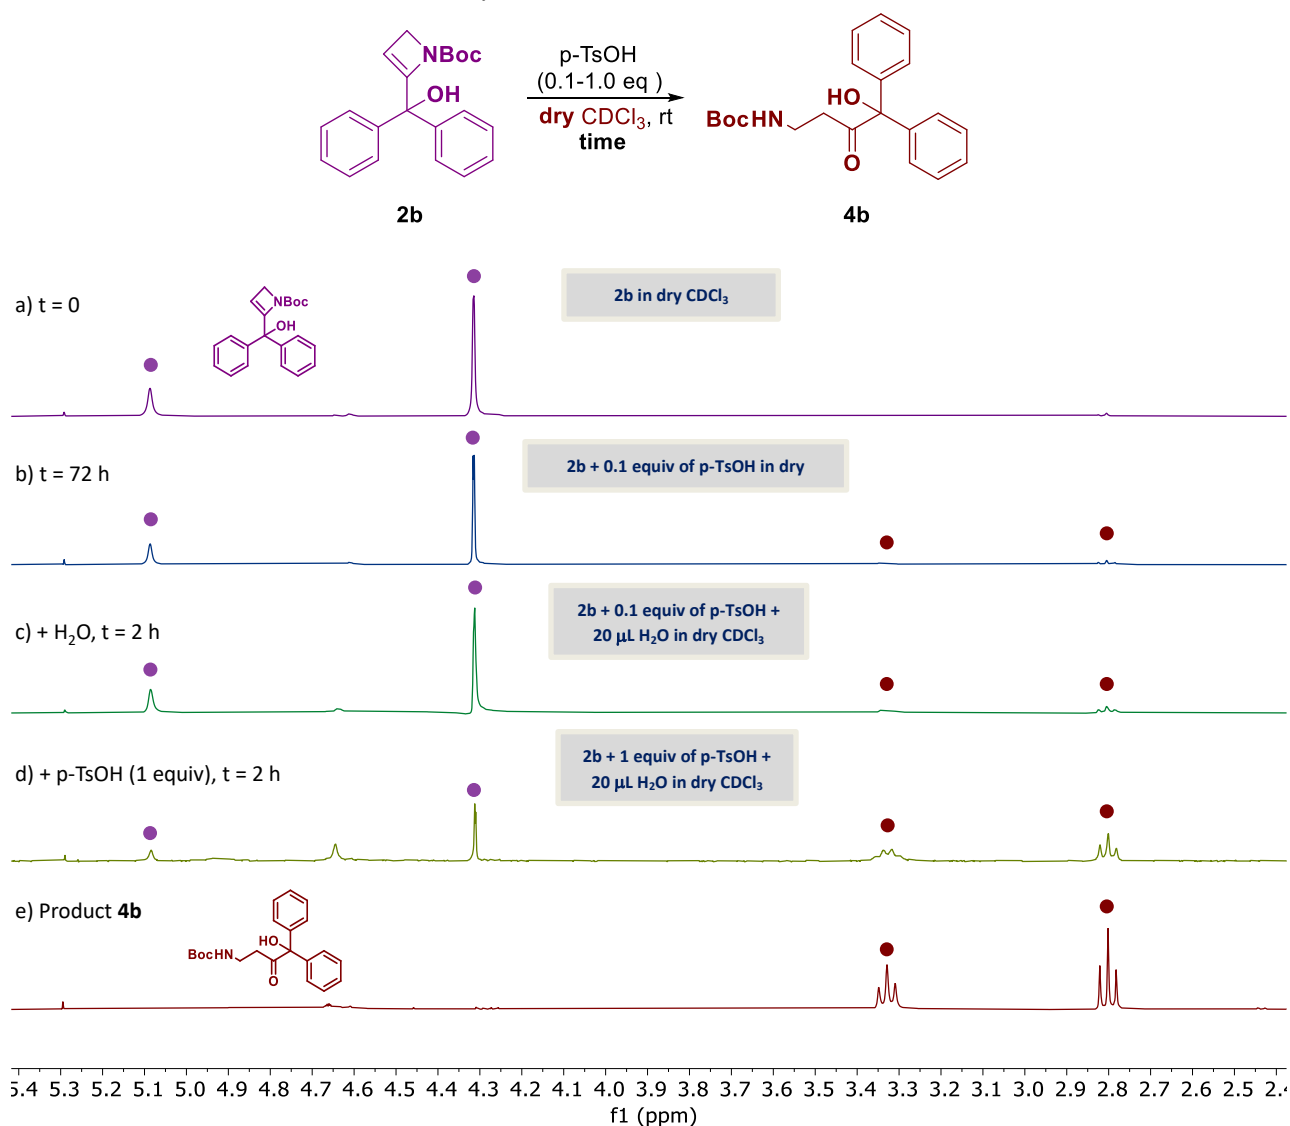

**Figure S5.**  $^1\text{H}$  NMR spectra for the ring opening reaction, assessing the role of water and acid catalyst.

## 5. Calculation of Green Metrics

The calculation of green metrics for the batch and continuous flow methods was performed following the reported equations.<sup>5,6,\*</sup>

$$\text{AE (Atom economy)} = \frac{\text{mass of desired product}}{\text{mass of total products}}$$

$$\text{MRP (Material Recovery Parameter)} = \frac{1}{1 + \frac{\varepsilon \cdot \text{AE} \cdot (c+s+w)}{\text{SF} \cdot m_{cp}}}$$

$$\text{RME (Reaction Mass Efficiency)} = \frac{\varepsilon \cdot \text{AE} \cdot \text{MRP}}{\text{SF}}$$

$$\text{STY (Space Time Yield)} = \frac{\text{mass of product}}{\text{Reactor volume} \cdot \text{Reaction time}}$$

Where  $\varepsilon$  = reaction yield

SF = stoichiometric factor

c = mass of not recovered catalysts

s = mass of not recovered solvents

w = mass of all the post-reaction materials employed

$m_{cp}$  = mass of the collected target product

$$\text{E-factor} = \frac{\text{mass of total waste}}{\text{mass of product}}$$

$$\text{Flow protocol (HCl). MRP} = \frac{1}{1 + \frac{0.98 \cdot 1 \cdot (0.241)}{1 \cdot 0.696}} = 0.747$$

were s = 0,241 g (not recovered CPME),  $m_{cp}$  = 0.696 g

$$\text{Batch protocol (oxalic acid). MRP} = \frac{1}{1 + \frac{0.98 \cdot 1 \cdot (0.270 \text{ g} + 1.815 \text{ g})}{1.043 \text{ g}}} = 0.338$$

were s = 1,815 g (not recovered DCM), c = 0.270 g (not recovered oxalic acid)  $m_{cp}$  = 1.043 g

$$\text{Flow protocol (HCl). E-factor} = \frac{0.241}{0.696} = 0.346$$

$$\text{Batch protocol (oxalic acid). E-factor} = \frac{0.177}{0.086} = 2.058$$

---

\* The exceeding 2mL of CPME solution (continuous flow 2.0 mmol scale reaction) employed for pushing out the desired product from the reactor was not considered for the calculation of green metrics.

### Flow (HCl 5% in H<sub>2</sub>O)

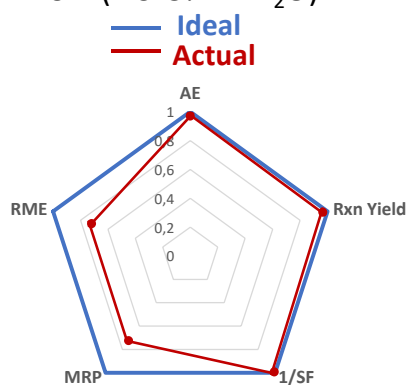

### Batch ((COOH)<sub>2</sub> • 2H<sub>2</sub>O)

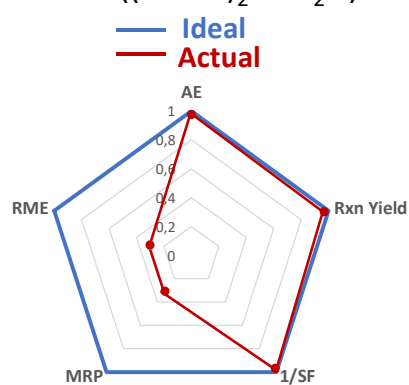

| Parameter | Actual (Flow) | Ideal (Flow) | Parameter | Actual (Batch) | Ideal (Batch) |
|-----------|---------------|--------------|-----------|----------------|---------------|
| AE        | 1             | 1            | AE        | 1              | 1             |
| Rxn Yield | 0.98          | 1            | Rxn Yield | 0.98           | 1             |
| 1/SF      | 1             | 1            | 1/SF      | 1              | 1             |
| MRP       | 0.747         | 1            | MRP       | 0.338          | 1             |
| RME       | 0.731         | 1            | RME       | 0.331          | 1             |
| STY       | 32.62 g/L*h   | -            | STY       | 23.69 g/L*h    | -             |
| E-factor  | 0.346         | 0            | E-factor  | 2.058          | 0             |

## 6. Characterization of products 4a-z

### *tert*-Butyl (3-oxopropyl)carbamate 4a

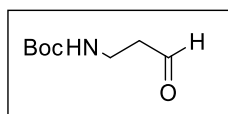

Following **GP2** with *tert*-butyl azete-1(2*H*)-carboxylate **2a** as starting material, compound **4a** was obtained as colorless oil (97%, 77 mg).  $^1\text{H NMR}$  (500 MHz,  $\text{CDCl}_3$ )  $\delta$  9.79 (s, 1H, COH), 4.93 (bs, 1H, NH), 3.44 – 3.37 (m, 2H,  $\text{NCH}_2\text{CH}_2$ ), 2.70 (t,  $J$  = 5.6 Hz, 2H,  $\text{NCH}_2\text{CH}_2$ ), 1.42 (s, 9H,  $3 \times \text{CH}_3$ ).  $^{13}\text{C}\{^1\text{H}\}$  NMR (126 MHz,  $\text{CDCl}_3$ )  $\delta$  201.6, 156.0, 79.7, 44.4, 34.2, 28.5. IR (film)/ $\text{cm}^{-1}$  3363, 2978, 2932, 1694, 1515, 1453, 1367, 1251, 1168, 915, 733. HRMS calcd for  $\text{C}_8\text{H}_{15}\text{NNaO}_3$   $[\text{M}+\text{Na}]^+$  196.0950; found 196.0954.

### *tert*-Butyl (4-hydroxy-3-oxo-4,4-diphenylbutyl)carbamate 4b

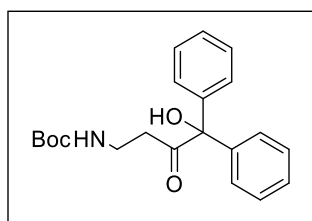

Following **GP2** with *tert*-Butyl 4-(Hydroxydiphenylmethyl)azete-1(2*H*)-carboxylate **2b** as starting material, compound **4b** was obtained as a white waxy solid (97%, 86 mg). Compound **4g** was obtained in 98% yield (35 mg) following **GP3**.  $^1\text{H NMR}$  (500 MHz,  $\text{CDCl}_3$ )  $\delta$  7.39 – 7.31 (m, 10H, Ar-H), 4.90 (bs, 1H, NH), 4.60 (s, 1H, OH), 3.37 – 3.29 (m, 2H,  $\text{NCH}_2\text{CH}_2$ ), 2.80 (t,  $J$  = 5.7 Hz, 2H,  $\text{NCH}_2\text{CH}_2$ ), 1.41 (s, 9H,  $3 \times \text{CH}_3$ ).  $^{13}\text{C}\{^1\text{H}\}$  NMR (126 MHz,  $\text{CDCl}_3$ )  $\delta$  210.7, 155.7, 141.4, 128.5, 128.3, 127.9, 85.4, 79.4, 38.9, 35.6, 28.4. IR (film)/ $\text{cm}^{-1}$  3401, 2917, 1713, 1682, 1525, 1447, 1367, 1274, 1165, 1050, 700. HRMS calcd for  $\text{C}_{21}\text{H}_{25}\text{NNaO}_4$   $[\text{M}+\text{Na}]^+$  378.1681; found 378.1682.

### *tert*-Butyl (4,4-bis(4-fluorophenyl)-4-hydroxy-3-oxobutyl)carbamate 4c

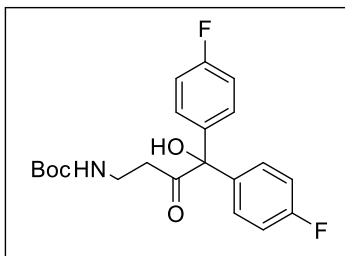

Following **GP2** with *tert*-Butyl 4-(bis(4-fluorophenyl)(hydroxy)methyl)azete-1(2*H*)-carboxylate **2c** as starting material, compound **4c** was obtained as a white waxy solid (96%, 94 mg).  $^1\text{H NMR}$  (500 MHz,  $\text{CDCl}_3$ )  $\delta$  7.34 – 7.28 (m, 4H, Ar-H), 7.08 – 7.03 (m, 4H, Ar-H), 4.86 (bs, 1H, NH), 4.56 (s, 1H, OH), 3.38 – 3.32 (m, 2H,  $\text{NCH}_2\text{CH}_2$ ), 2.78 (t,  $J$  = 5.8 Hz, 2H,  $\text{NCH}_2\text{CH}_2$ ), 1.41 (s, 9H,  $3 \times \text{CH}_3$ ).  $^{13}\text{C}\{^1\text{H}\}$  NMR (126 MHz,  $\text{CDCl}_3$ )  $\delta$  207.1, 162.7 (d,  $^1J_{\text{CF}}$  = 248.5 Hz), 156.0, 137.2 (d,  $^4J_{\text{CF}}$  = 3.3 Hz), 129.8 (d,  $^3J_{\text{CF}}$  = 8.2 Hz), 115.7 (d,  $^2J_{\text{CF}}$  = 21.6 Hz), 84.6, 79.8, 39.0, 35.8, 28.5.  $^{19}\text{F NMR}$  (470 MHz,  $\text{CDCl}_3$ )  $\delta$  -113.31 (s). IR (film)/ $\text{cm}^{-1}$  3400, 2979, 2917, 1693, 1506, 1393, 1367, 1230, 1161, 1068, 836. HRMS calcd for  $\text{C}_{21}\text{H}_{23}\text{F}_2\text{NNaO}_4$   $[\text{M}+\text{Na}]^+$  414.1493; found 414.1485.

### *tert*-Butyl (*E*)-(4-hydroxy-3-oxo-4,6-diphenylhex-5-en-1-yl)carbamate 4d

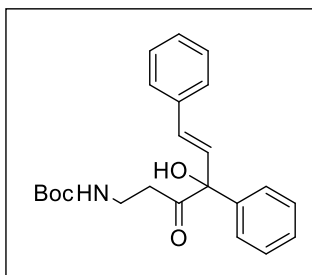

Following **GP2** with *tert*-Butyl (*E*)-3-(1-Hydroxy-1,3-diphenylallyl)azetidine-1-carboxylate **2d** as starting material, compound **4d** was obtained as a white waxy solid (95%, 90 mg).  $^1\text{H NMR}$  (500 MHz,  $\text{CDCl}_3$ )  $\delta$  7.48 – 7.27 (m, 10 H, Ar-H), 6.99 (d,  $J$  = 15.7 Hz, 1H, CH=CH), 6.81 (d,  $J$  = 15.7 Hz, 1H, CH=CH), 4.85 (bs, 1H, NH), 4.62 (bs, 1H, OH), 3.38 – 3.33 (m, 2H,  $\text{NCH}_2\text{CH}_2$ ), 2.85 – 2.80 (m, 1H), 2.72 – 2.66 (m, 1H), 1.36 (s, 9H,  $3 \times \text{CH}_3$ ).  $^{13}\text{C}\{^1\text{H}\}$  NMR (126 MHz,  $\text{CDCl}_3$ )  $\delta$  209.0, 155.9, 140.9, 136.3, 132.9, 129.1, 128.8, 128.6, 128.4, 127.1, 127.0, 126.8, 83.3, 79.6, 37.8, 35.7, 28.5. IR (film)/ $\text{cm}^{-1}$  3435, 2977, 2917, 1710, 1495, 1449, 1366, 1266, 1168, 1073, 739. HRMS calcd for  $\text{C}_{23}\text{H}_{27}\text{NNaO}_4$   $[\text{M}+\text{Na}]^+$  404.1838; found 404.1844.

#### ***tert*-Butyl (4-(3-bromophenyl)-4-hydroxy-3-oxo-4-phenylbutyl)carbamate **4e****

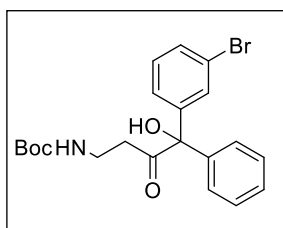

Following **GP2** with *tert*-Butyl 4-((3-bromophenyl)(hydroxy)(phenyl)methyl)azete-1(2*H*)-carboxylate **2e** as starting material, compound **4e** was obtained as a white waxy solid (95%, 103 mg).  $^1\text{H NMR}$  (500 MHz,  $\text{CDCl}_3$ )  $\delta$  7.58 – 7.56 (m, 1 H, Ar-H), 7.50 – 7.46 (m, 1H, Ar-H), 7.40 – 7.35 (m, 3H, Ar-H), 7.31 – 7.27 (m, 2H, Ar-H), 7.26 – 7.21 (m, 2H, Ar-H overlapping  $\text{CHCl}_3$  signal), 4.90 (bs, 1H, NH), 4.58 (s, 1H, OH), 3.39 – 3.32 (m, 2H,  $\text{NCH}_2\text{CH}_2$ ), 2.86 (dt,  $J$  = 18.4, 5.7 Hz, 1H,  $\text{NCH}_2\text{CHH}$ ), 2.75 (dt,  $J$  = 18.2, 5.8 Hz, 1H,  $\text{NCH}_2\text{CH}_2$ ), 1.41 (s, 9H, 3  $\times$   $\text{CH}_3$ ).  $^{13}\text{C}\{^1\text{H}\}$  NMR (126 MHz,  $\text{CDCl}_3$ )

$\delta$  210.2, 156.0, 143.7, 141.1, 131.6, 131.1, 130.1, 128.9, 128.7, 127.9, 126.8, 122.9, 85.1, 79.7, 39.2, 35.7, 28.5. IR (film)/ $\text{cm}^{-1}$  3413, 2975, 2924, 1691, 1510, 1448, 1366, 1250, 1167, 1060, 698. HRMS calcd for  $\text{C}_{21}\text{H}_{24}\text{BrNNaO}_4$   $[\text{M}+\text{Na}]^+$  456.0786; found 456.0784.

#### ***tert*-Butyl (4-hydroxy-3-oxo-4,4-di-*p*-tolylbutyl)carbamate **4f****

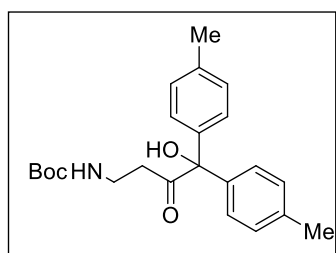

Following **GP2** with *tert*-Butyl 4-(Hydroxydi-*p*-tolylmethyl)azete-1(2*H*)-carboxylate **2f** as starting material, compound **4f** was obtained as a white waxy solid (96%, 92 mg).  $^1\text{H NMR}$  (500 MHz,  $\text{CDCl}_3$ )  $\delta$  7.21 (d,  $J$  = 8.3 Hz, 4 H, Ar-H), 7.16 (d,  $J$  = 8.1 Hz, 4 H, Ar-H), 4.89 (bs, 1H, NH), 4.50 (s, 1H, OH), 3.35 – 3.29 (m, 2H,  $\text{NCH}_2\text{CH}_2$ ), 2.79 (t,  $J$  = 5.7 Hz, 2H,  $\text{NCH}_2\text{CH}_2$ ), 2.35 (s, 6H, 2  $\times$  Ar- $\text{CH}_3$ ), 1.41 (s, 9H, 3  $\times$   $\text{CH}_3$ ).  $^{13}\text{C}\{^1\text{H}\}$  NMR (126 MHz,  $\text{CDCl}_3$ )  $\delta$  211.0, 155.7, 138.5, 138.0, 129.1, 127.8, 85.1, 79.3, 38.6, 35.6, 28.4, 21.1. IR (film)/ $\text{cm}^{-1}$  3414,

2976, 2924, 1706, 1509, 1454, 1366, 1279, 1168, 1068, 816. HRMS calcd for  $\text{C}_{23}\text{H}_{29}\text{NNaO}_4$   $[\text{M}+\text{Na}]^+$  406.1994; found 406.1999.

#### ***tert*-Butyl (4,4-bis(4-chlorophenyl)-4-hydroxy-3-oxobutyl)carbamate **4g****

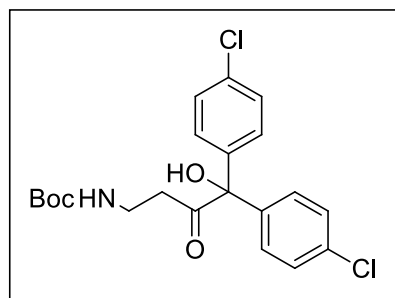

Following **GP2** with *tert*-Butyl 4-(bis(4-chlorophenyl)(hydroxy)methyl)azete-1(2*H*)-carboxylate **2g** as starting material, compound **4g** was obtained as white waxy solid (95%, 100 mg). Compound **4g** was obtained in 96% yield (41 mg) following **GP3**.  $^1\text{H NMR}$  (300 MHz,  $\text{CDCl}_3$ )  $\delta$  7.37 – 7.31 (m, 4H, Ar-H), 7.30 – 7.23 (m, 4H, Ar-H overlapping  $\text{CHCl}_3$  signal), 4.87 (bs, 1H, NH), 4.61 (s, 1H, OH), 3.40 – 3.29 (m, 2H,  $\text{NCH}_2\text{CH}_2$ ), 2.78 (t,  $J$  = 5.8 Hz, 2H,  $\text{NCH}_2\text{CH}_2$ ), 1.41 (s, 9H, 3  $\times$   $\text{CH}_3$ ).  $^{13}\text{C}\{^1\text{H}\}$  NMR (126 MHz,  $\text{CDCl}_3$ )  $\delta$  209.8, 156.0, 139.7, 134.7, 129.3, 129.0, 84.7, 79.9, 39.1, 35.8, 28.5. IR (film)/ $\text{cm}^{-1}$  3401, 2917, 2849, 1688, 1490,

1400, 1366, 1283, 1167, 1093, 823. HRMS calcd for  $\text{C}_{21}\text{H}_{23}\text{Cl}_2\text{NNaO}_4$   $[\text{M}+\text{Na}]^+$  446.0902; found 446.0906.

#### ***tert*-Butyl (4-hydroxy-3-oxo-4-phenylpentyl)carbamate **4h****

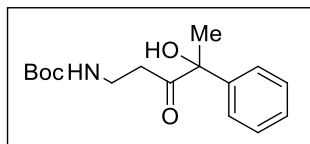

Following **GP2** with *tert*-Butyl 4-(1-Hydroxy-1-phenylethyl)azete-1(2*H*)-carboxylate **2h** as starting material, compound **4h** was obtained as a pale yellow oil (96%, 70 mg). Compound **4h** was obtained in 98% yield (29 mg) following **GP3**.  $^1\text{H NMR}$  (500 MHz,  $\text{CDCl}_3$ )  $\delta$  7.43 – 7.40 (m, 2 H, Ar-H), 7.39 – 7.34 (m, 2H, Ar-H), 7.32 – 7.28 (m, 1 H, Ar-H), 4.81 (bs, 1H, NH), 3.35 – 3.23 (m, 2H,  $\text{NCH}_2\text{CH}_2$ ), 2.73 – 2.65 (m, 1H,  $\text{NCH}_2\text{CH}_2$ ), 2.57 – 2.48 (m, 1H,  $\text{NCH}_2\text{CH}_2$ ), 1.74 (s, 3H,  $\text{CH}_3$ ), 1.37 (s, 9H, 3  $\times$   $\text{CH}_3$ ).  $^{13}\text{C}\{^1\text{H}\}$  NMR (126 MHz,  $\text{CDCl}_3$ )  $\delta$  211.3, 155.8, 141.1, 128.7, 128.1, 125.8, 80.0, 79.4, 36.2, 35.6, 28.3, 24.3. IR (film)/ $\text{cm}^{-1}$

3408, 2978, 2933, 1709, 1515, 1448, 1367, 1281, 1170, 1073, 701. HRMS calcd for  $\text{C}_{16}\text{H}_{23}\text{NNaO}_4$   $[\text{M}+\text{Na}]^+$  316.1525; found 316.1523.

#### ***tert*-Butyl (3-(1-hydroxycyclohexyl)-3-oxopropyl)carbamate 4i**

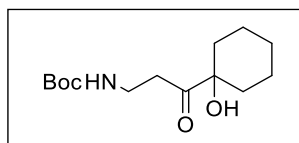

Following **GP2** with *tert*-Butyl 4-(1-Hydroxycyclohexyl)azete-1(2*H*)-carboxylate **2i** as starting material, compound **4i** was obtained as a pale yellow oil (95%, 64 mg).

**<sup>1</sup>H NMR** (500 MHz, CDCl<sub>3</sub>) δ 4.94 (bs, 1H, NH), 3.44 – 3.36 (m, 2H, NCH<sub>2</sub>CH<sub>2</sub>), 2.81 (t, *J* = 5.7 Hz, 2H, NCH<sub>2</sub>CH<sub>2</sub>), 1.76 – 1.60 (m, 7H, cyclohexyl-CH<sub>2</sub>), 1.49 – 1.44 (m,

2H, cyclohexyl-CH<sub>2</sub>), 1.41 (s, 9H, 3 × CH<sub>3</sub>), 1.30 – 1.21 (m, 1H, cyclohexyl-CH<sub>2</sub>). **<sup>13</sup>C{<sup>1</sup>H} NMR** (126 MHz, CDCl<sub>3</sub>) δ 214.4, 155.9, 79.4, 78.1, 36.2, 35.5, 33.7, 28.3, 25.2, 21.0. **IR** (film)/cm<sup>-1</sup> 3390, 2977, 2933, 1704, 1694, 1519, 1506, 1367, 1252, 1170, 986. **HRMS** calcd for C<sub>14</sub>H<sub>25</sub>NNaO<sub>4</sub> [M+Na]<sup>+</sup> 294.1681; found 294.1670.

#### ***tert*-Butyl (3-(dimethyl(phenyl)silyl)-3-oxopropyl)carbamate 4j**

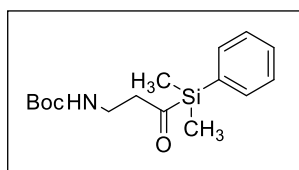

Following **GP2** with *tert*-Butyl 4-(dimethyl(phenyl)silyl)azete-1(2*H*)-carboxylate **2j** as starting material, compound **4j** was obtained as a pale yellow oil (95%, 73 mg). **<sup>1</sup>H NMR** (500 MHz, CDCl<sub>3</sub>) δ 7.54 – 7.51 (m, 2H, Ar-H), 7.44 – 7.37 (m, 3 H, Ar-H), 4.86 (bs, 1H, NH), 3.32 – 3.23 (m, 2H, NCH<sub>2</sub>CH<sub>2</sub>), 2.79 (t, *J* = 5.7 Hz, 2H, NCH<sub>2</sub>CH<sub>2</sub>), 1.39 (s, 9H, 3 × CH<sub>3</sub>), 0.49 (s, 6H, Si(CH<sub>3</sub>)<sub>2</sub>). **<sup>13</sup>C{<sup>1</sup>H} NMR** (126 MHz,

CDCl<sub>3</sub>) δ 246.4, 156.0, 134.1, 134.0, 130.2, 128.4, 79.3, 48.5, 34.3, 28.5, – 4.8. **IR** (film)/cm<sup>-1</sup> 3393, 2849, 1712, 1639, 1505, 1365, 1249, 1170, 1111, 835, 699. **HRMS** calcd for C<sub>16</sub>H<sub>25</sub>NNaO<sub>3</sub>Si [M+Na]<sup>+</sup> 330.1501; found 330.1509.

#### ***tert*-Butyl (5,5,5-trifluoro-4-hydroxy-3-oxo-4-phenylpentyl)carbamate 4k**

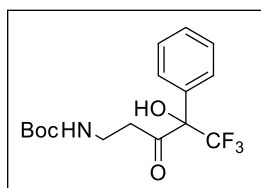

Following **GP2** with *tert*-butyl 4-(2,2,2-trifluoro-1-hydroxy-1-phenylethyl)azete-1(2*H*)-carboxylate **2k** as starting material, compound **4k** was obtained as white waxy solid (96%, 83 mg). **<sup>1</sup>H NMR** (500 MHz, CDCl<sub>3</sub>) δ 7.56 – 7.53 (m, 2H, Ar-H), 7.45 – 7.38 (m, 3H, Ar-H), 5.30 (s, 1H), 4.82 (s, 1H), 3.45 – 3.29 (m, 2H, NCH<sub>2</sub>), 2.80 – 2.71 (m, 2H, NCH<sub>2</sub>CH<sub>2</sub>), 1.39 (s, 9H, 3 × CH<sub>3</sub>). **<sup>13</sup>C{<sup>1</sup>H} NMR** (126 MHz, CDCl<sub>3</sub>) δ 203.3, 156.1, 132.8, 129.5, 129.0, 126.4, 123.4 (q, <sup>1</sup>*J*<sub>CF</sub> = 286.3 Hz), 82.4 (q, <sup>2</sup>*J*<sub>CF</sub> = 28.2 Hz), 80.0,

38.5, 35.9, 28.3. **<sup>19</sup>F NMR** (282 MHz, CDCl<sub>3</sub>) δ -73.46 (s). **IR** (film)/cm<sup>-1</sup> 3429, 2980, 2931, 1726, 1694, 1515, 1453, 1368, 1276, 1169, 919. **HRMS** calcd for C<sub>16</sub>H<sub>20</sub>F<sub>3</sub>NNaO<sub>4</sub> [M+Na]<sup>+</sup> 370.1242; found 370.1248.

#### ***tert*-Butyl (4-(3-chlorophenyl)-4-hydroxy-3-oxobutyl)carbamate 4l**

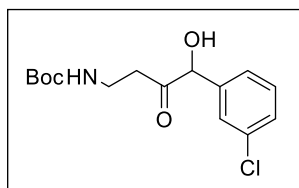

Following **GP2** with *tert*-Butyl 4-((3-chlorophenyl)(hydroxy)methyl)azete-1(2*H*)-carboxylate **2l** as starting material, compound **4l** was obtained as a pale yellow oil (95%, 74 mg). **<sup>1</sup>H NMR** (500 MHz, CDCl<sub>3</sub>) δ 7.32 – 7.31 (m, 3H, Ar-H), 7.24 – 7.20 (m, 1H, Ar-H), 5.06 (d, *J* = 4.1 Hz, OH), 4.81 (bs, 1H, NH), 4.22 (d, *J* = 4.1 Hz, 1H, CHOH), 3.38 – 3.31 (m, 2H, NCH<sub>2</sub>CH<sub>2</sub>), 2.71 – 2.63 (m, 1H, NCH<sub>2</sub>CH<sub>2</sub>), 2.52 (dt, *J* = 17.8, 5.7 Hz, 1H, NCH<sub>2</sub>CH<sub>2</sub>), 1.39 (s, 9H, 3 × CH<sub>3</sub>). **<sup>13</sup>C{<sup>1</sup>H} NMR** (126 MHz, CDCl<sub>3</sub>)

δ 208.1, 155.7, 139.6, 135.1, 130.3, 129.0, 127.3, 125.5, 79.6, 79.2, 38.3, 35.1, 28.3. **IR** (film)/cm<sup>-1</sup> 3452, 2980, 2928, 1709, 1507, 1393, 1367, 1250, 1168, 910, 734. **HRMS** calcd for C<sub>15</sub>H<sub>20</sub>ClNNaO<sub>4</sub> [M+Na]<sup>+</sup> 336.0979; found 336.0976.



#### ***tert*-Butyl (4-(3-chlorophenyl)-4-hydroxy-3-oxobutyl)carbamate 4m**

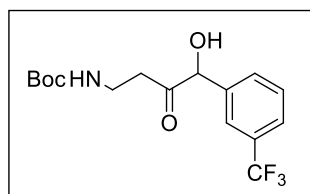

Following **GP2** with *tert*-Butyl 4-((3-trifluoromethylphenyl)(hydroxy)methyl)azete-1(2*H*)-carboxylate **2m** as starting material, compound **4m** was obtained as a pale yellow oil (96%, 83 mg). Compound **4m** was obtained in 95% yield (33 mg) following **GP3**. <sup>1</sup>**H NMR** (500 MHz, CDCl<sub>3</sub>) δ 7.63 – (d, *J* = 8.0 Hz, 1H), 7.52 (d, *J* = 5.3 Hz, 1H), 5.16 (d, *J* = 3.9 Hz, 1H), 4.84 (s, 1H), 4.31 (d, *J* = 4.0 Hz, 1H), 3.35 (dd, *J* = 11.3, 5.5 Hz, 1H), 2.74 – 2.63 (m, 1H), 2.50 (dt, *J* = 18.0, 5.7 Hz, 1H), 1.39 (s, 5H). <sup>19</sup>**F NMR** (377 MHz, CDCl<sub>3</sub>) δ -62.86. <sup>13</sup>**C{<sup>1</sup>H}** **NMR** (101 MHz, CDCl<sub>3</sub>) δ 208.3, 156.0, 138.9, 131.7 (q, *J* = 32.6 Hz), 130.8, 129.7, 125.8 (q, *J* = 3.6 Hz), 124.1, 123.9 (q, *J* = 272.4 Hz), 79.8, 79.5, 38.4, 35.2, 28.4. **IR** (film)/cm<sup>-1</sup> 3374, 2979, 2931, 1694, 1124, 1072, 736, 702. **HRMS** calcd for C<sub>16</sub>H<sub>20</sub>F<sub>3</sub>NNaO<sub>4</sub> [M+Na]<sup>+</sup> 370.1242; found 370.1240.

#### ***tert*-Butyl (3-(1-hydroxy-3-phenoxy-cyclobutyl)-3-oxopropyl)carbamate 4n**

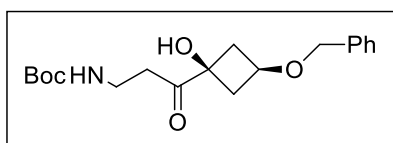

Following **GP2** with *tert*-Butyl 4-(3-(Benzyloxy)-1-hydroxycyclobutyl)azete-1(2*H*)-carboxylate **2n** as starting material, compound **4n** was obtained as a white waxy solid (96%, 83 mg). <sup>1</sup>**H NMR** (500 MHz, CDCl<sub>3</sub>) δ 7.38 – 7.27 (m, 5H, Ar-H), 4.96 (bs, 1H, NH), 4.45 (s, 2H, OCH<sub>2</sub>), 3.96 (quin, *J* = 6.8 Hz, 1H, CHOCH<sub>2</sub>), 3.46 – 3.40 (m, 2H, NCH<sub>2</sub>CH<sub>2</sub>), 2.83 – 2.75 (m, 4H, 2H NCH<sub>2</sub>CH<sub>2</sub> and 2H COHCH<sub>2</sub>), 2.33 – 2.26 (m, 2H, COHCH<sub>2</sub>), 1.42 (s, 9H, 3 × CH<sub>3</sub>). <sup>13</sup>**C{<sup>1</sup>H}** **NMR** (126 MHz, CDCl<sub>3</sub>) δ 211.9, 156.0, 137.7, 128.4, 127.8, 127.8, 79.6, 73.6, 70.5, 64.6, 43.0, 36.4, 35.5, 28.3. **IR** (film)/cm<sup>-1</sup> 3391, 2927, 2855, 1692, 1514, 1454, 1366, 1247, 1168, 1069, 736. **HRMS** calcd for C<sub>19</sub>H<sub>27</sub>NNaO<sub>5</sub> [M+Na]<sup>+</sup> 372.1787; found 372.1797.

#### ***tert*-Butyl (3-(1-hydroxycyclododecyl)-3-oxopropyl)carbamate 4o**

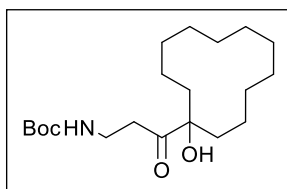

Following **GP2** with *tert*-Butyl 4-(1-hydroxycyclododecyl)azete-1(2*H*)-carboxylate **2o** as starting material, compound **4o** was obtained as a white waxy solid (96%, 85 mg). Compound **4o** was obtained in 97% yield (35 mg) following **GP3**. <sup>1</sup>**H NMR** (500 MHz, CDCl<sub>3</sub>) δ 4.96 (bs, 1H, NH), 3.42 – 3.35 (m, 2H, NCH<sub>2</sub>), 2.90 (s, 1H, OH), 2.80 (t, *J* = 5.8 Hz, 2H, NCH<sub>2</sub>CH<sub>2</sub>), 1.66 – 1.61 (m, 4H, cyclododecyl-CH<sub>2</sub>), 1.42 (s, 9H, 3 × CH<sub>3</sub>), 1.36 (bs, 18H, cyclododecyl-CH<sub>2</sub>). <sup>13</sup>**C{<sup>1</sup>H}** **NMR** (126 MHz, CDCl<sub>3</sub>) δ 214.6, 156.1, 81.4, 79.5, 37.9, 35.7, 32.3, 28.6, 26.5, 26.0, 22.8, 22.4, 19.6. **IR** (film)/cm<sup>-1</sup> 3466, 2917, 2849, 1688, 1515, 1471, 1365, 1248, 1166, 1080, 968. **HRMS** calcd for C<sub>20</sub>H<sub>37</sub>NNaO<sub>4</sub> [M+Na]<sup>+</sup> 378.2620; found 378.2639.

#### ***tert*-Butyl (4-hydroxy-3-oxodecyl)carbamate 4p**

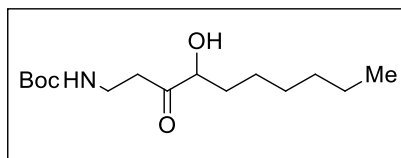

Following **GP2** with *tert*-Butyl 4-(1-Hydroxyheptyl)azete-1(2*H*)-carboxylate **2p** as starting material, compound **4p** was obtained as a pale yellow oil (95%, 68 mg). <sup>1</sup>**H NMR** (500 MHz, CDCl<sub>3</sub>) δ 4.95 (bs, 1H, NH), 4.19 – 4.13 (m, 1H, CHOH), 3.45 – 3.39 (m, 2H, NCH<sub>2</sub>CH<sub>2</sub>), 3.35 (d, *J* = 4.8 Hz, 1H, OH), 2.77 (dt, *J* = 17.9, 5.8 Hz, 1H, NCH<sub>2</sub>CH<sub>2</sub>), 2.65 (dt, *J* = 17.5, 5.6 Hz, 1H, NCH<sub>2</sub>CH<sub>2</sub>), 1.84 – 1.76 (m, 1H, CH<sub>2</sub>), 1.57 – 1.49 (m, 1H, CH<sub>2</sub>), 1.43 (s, 9H, 3 × CH<sub>3</sub>), 1.35 – 1.24 (m, 8H, 4 × CH<sub>2</sub>), 0.90 – 0.85 (m, 3H, CH<sub>2</sub>CH<sub>3</sub>). <sup>13</sup>**C{<sup>1</sup>H}** **NMR** (126 MHz, CDCl<sub>3</sub>) δ 211.8, 155.9, 79.5, 76.6, 38.1, 35.1, 33.6, 31.6, 29.1, 28.3, 24.7, 22.5, 14.0. **IR** (film)/cm<sup>-1</sup> 3391, 2956, 2930, 1712, 1514, 1456, 1366, 1251, 1171, 1085, 962. **HRMS** calcd for C<sub>15</sub>H<sub>29</sub>NNaO<sub>4</sub> [M+Na]<sup>+</sup> 310.1994; found 310.1996.

#### **tert-Butyl (6-chloro-4-(4-fluorophenyl)-4-hydroxy-3-oxohexyl)carbamate 4q**

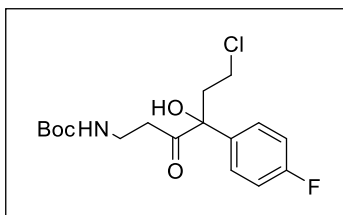

Following **GP2** with *tert*-Butyl 4-(3-Chloro-1-(4-fluorophenyl)-1-hydroxypropyl)-azete-1(2*H*)-carboxylate **2q** as starting material, compound **4q** was obtained as a white waxy solid (96%, 86 mg). <sup>1</sup>H NMR (500 MHz, CDCl<sub>3</sub>) δ 7.42 – 7.39 (m, 2H, Ar-H), 7.09 – 7.02 (m, 2H, Ar-H), 4.78 (bs, 1H, NH), 3.62 – 3.51 (m, 2H, CH<sub>2</sub>CH<sub>2</sub>Cl), 3.31 – 3.25 (m, 2H, NCH<sub>2</sub>CH<sub>2</sub>), 2.73 – 2.59 (m, 4H, 2H NCH<sub>2</sub>CH<sub>2</sub> and 2H CH<sub>2</sub>CH<sub>2</sub>Cl), 1.38 (s, 9H, 3 × CH<sub>3</sub>). <sup>13</sup>C{<sup>1</sup>H} NMR (126

MHz, CDCl<sub>3</sub>) δ 209.7, 162.5 (d, <sup>1</sup>J<sub>CF</sub> = 248.0 Hz), 156.0, 135.3, 127.5 (d, <sup>3</sup>J<sub>CF</sub> = 8.2 Hz), 115.8 (d, <sup>2</sup>J<sub>CF</sub> = 21.6 Hz), 81.3, 79.7, 40.1, 39.4, 36.4, 35.7, 28.3. <sup>19</sup>F NMR (470 MHz, CDCl<sub>3</sub>) δ -113.72 (s). IR (film)/cm<sup>-1</sup> 3411, 2978, 2933, 1710, 1688, 1602, 1507, 1367, 1237, 1162, 836. HRMS calcd for C<sub>17</sub>H<sub>23</sub>ClFNNaO<sub>4</sub> [M+Na]<sup>+</sup> 382.1197; found 382.1192.

#### **tert-Butyl (7-chloro-4-hydroxy-3-oxo-4-phenylheptyl)carbamate 4r**

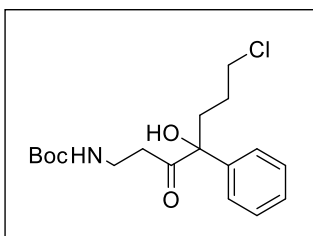

Following **GP2** with *tert*-Butyl 4-(4-chloro-1-hydroxy-1-phenylbutyl)azete-1(2*H*)-carboxylate **2r** as starting material, compound **4r** was obtained as white waxy solid (95%, 84 mg). <sup>1</sup>H NMR (500 MHz, CDCl<sub>3</sub>) δ 7.46 – 7.43 (m, 2H, Ar-H), 7.39 – 7.36 (m, 2H, Ar-H), 7.32 – 7.29 (m, 1H, Ar-H), 4.76 (bs, 1H, NH), 4.47 (s, 1H, OH), 3.60 – 3.56 (m, 2H, CH<sub>2</sub>CH<sub>2</sub>Cl), 3.33 – 3.25 (m, 2H, NCH<sub>2</sub>CH<sub>2</sub>), 2.69 – 2.66 (m, 1H, NCH<sub>2</sub>CH<sub>2</sub>), 2.62 – 2.57 (m, 1H, NCH<sub>2</sub>CH<sub>2</sub>), 2.36 – 2.31 (m, 1H, CH<sub>2</sub>CH<sub>2</sub>CH<sub>2</sub>Cl), 2.29 – 2.21 (m, 1H, CH<sub>2</sub>CH<sub>2</sub>CH<sub>2</sub>Cl), 1.95 – 1.84 (m, 1H, CH<sub>2</sub>CH<sub>2</sub>Cl),

1.75 – 1.66 (m, 1H, CH<sub>2</sub>CH<sub>2</sub>Cl), 1.38 (s, 9H, 3 × CH<sub>3</sub>). <sup>13</sup>C{<sup>1</sup>H} NMR (126 MHz, CDCl<sub>3</sub>) δ 210.9, 156.0, 140.0, 129.0, 128.3, 126.2, 82.4, 79.7, 45.3, 36.5, 35.7, 34.2, 28.5, 26.7. IR (film)/cm<sup>-1</sup> 3413, 2918, 2849, 1694, 1514, 1448, 1366, 1251, 1169, 1073, 756. HRMS calcd for C<sub>18</sub>H<sub>26</sub>ClNNaO<sub>4</sub> [M+Na]<sup>+</sup> 378.1448; found 378.1419.

#### **tert-Butyl (3-(2-(4-fluorophenyl)oxetan-2-yl)-3-oxopropyl)carbamate 4s**

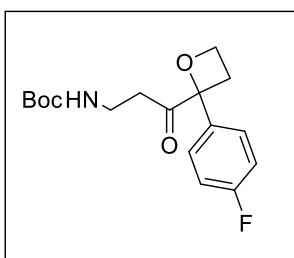

Following **GP2** with *tert*-Butyl 4-(2-(4-fluorophenyl)oxetan-2-yl)azete-1(2*H*)-carboxylate **2s** as starting material, compound **4s** was obtained as white waxy solid (95%, 77mg). <sup>1</sup>H NMR (500 MHz, CDCl<sub>3</sub>) δ 7.40 – 7.36 (m, 2H, Ar-H), 7.09 – 7.06 (m, 2H, Ar-H), 4.81 (bs, 1H, NH), 4.61 – 4.54 (m, 2H, OCH<sub>2</sub>), 3.32 – 3.31 (m, 3H, 2H NCH<sub>2</sub> and 1H OCH<sub>2</sub>CH<sub>2</sub>), 2.95 (dt, *J* = 18.3, 5.8 Hz, 1H, NCH<sub>2</sub>CH<sub>2</sub>), 2.73 – 2.65 (m, 1H, OCH<sub>2</sub>CH<sub>2</sub>), 2.56 – 2.47 (m, 1H, NCH<sub>2</sub>CH<sub>2</sub>), 1.38 (s, 9H, 3 × CH<sub>3</sub>). <sup>13</sup>C{<sup>1</sup>H} NMR (126 MHz, CDCl<sub>3</sub>) δ 210.7, 162.6 (d, <sup>1</sup>J<sub>CF</sub> = 247.4 Hz), 155.8, 136.2 (d, <sup>4</sup>J<sub>CF</sub>, *J* = 3.0 Hz), 126.2 (d, <sup>3</sup>J<sub>CF</sub> = 8.4 Hz), 115.8 (d, <sup>2</sup>J<sub>CF</sub>, *J* = 21.7 Hz), 90.8, 79.4, 66.2, 35.9,

32.4, 29.9, 28.5. <sup>19</sup>F NMR (470 MHz, CDCl<sub>3</sub>) δ -114.17 (s). IR (film)/cm<sup>-1</sup> 3398, 2918, 2850, 1713, 1646, 1506, 1366, 1236, 1169. HRMS calcd for C<sub>17</sub>H<sub>22</sub>FNNaO<sub>4</sub> [M+Na]<sup>+</sup> 346.1431; 346.1434 found.

#### **tert-Butyl (3-oxo-3-(2-phenyltetrahydrofuran-2-yl)propyl)carbamate 4t**

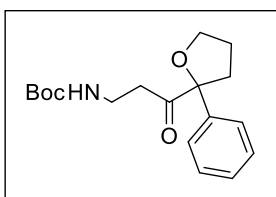

Following **GP2** with *tert*-Butyl 4-(2-phenyltetrahydrofuran-2-yl)azete-1(2*H*)-carboxylate **2t** as starting material, compound **4t** was obtained as white waxy solid (96%, 77 mg). Compound **4t** was obtained in 98% yield (31 mg) following **GP3**. <sup>1</sup>H NMR (500 MHz, CDCl<sub>3</sub>) δ 7.43 – 7.40 (m, 2H, Ar-H), 7.35 – 7.31 (m, 2H, Ar-H), 7.28 – 7.24 (m, 1H, Ar-H overlapping CHCl<sub>3</sub> signal), 4.78 (bs, 1H, NH), 4.07 – 3.96 (m, 2H, OCH<sub>2</sub>), 3.27 – 3.19 (m, 2H, NCH<sub>2</sub>), 2.91 – 2.79 (m, 2H, 1H NCH<sub>2</sub>CH<sub>2</sub> and 1H

OCH<sub>2</sub>CH<sub>2</sub>CH<sub>2</sub>), 2.64 – 2.55 (m, 1H, NCH<sub>2</sub>CH<sub>2</sub>), 2.02 – 1.94 (m, 1H, OCH<sub>2</sub>CH<sub>2</sub>CH<sub>2</sub>), 1.91 – 1.82 (m, 2H OCH<sub>2</sub>CH<sub>2</sub>), 1.37 (s, 9H, 3 × CH<sub>3</sub>). <sup>13</sup>C{<sup>1</sup>H} NMR (126 MHz, CDCl<sub>3</sub>) δ 211.0, 155.7, 140.8, 128.5, 127.6, 125.0, 92.4, 79.2,

79.0, 68.8, 36.9, 35.6, 35.4, 28.5, 25.9. IR (film)/cm<sup>-1</sup> 3400, 2917, 2849, 1714, 1505, 1447, 1365, 1249, 1170, 1060, 700. HRMS calcd for C<sub>18</sub>H<sub>25</sub>NNaO<sub>4</sub> [M+Na]<sup>+</sup> 342.1681; found 342.1678.

***tert*-Butyl 3-(3-((*tert*-butoxycarbonyl)amino)propanoyl)-3-hydroxyazetidine-1-carboxylate **4u****

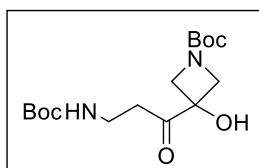

Following **GP2** with *tert*-Butyl 4-(1-(*tert*-Butoxycarbonyl)-3-hydroxyazetidin-3-yl)-azete-1(2*H*)-carboxylate **2u** as starting material, compound **4u** was obtained as a pale yellow oil (95%, 82 mg). Compound **4u** was obtained in 93% yield (32 mg) following **GP3**. <sup>1</sup>H NMR (500 MHz, CDCl<sub>3</sub>) δ 4.99 (bs, 1H, NH), 4.12 and 4.01 (2 × d, AB system, *J* = 9.5 Hz, 4H, azetidine-CH<sub>2</sub>), 3.52 – 3.45 (m, 2H, NHCH<sub>2</sub>), 2.99 (t, *J* = 5.6

Hz, 2H, NCH<sub>2</sub>CH<sub>2</sub>), 1.45 (s, 9H, 3 × CH<sub>3</sub>), 1.42 (s, 9H, 3 × CH<sub>3</sub>). <sup>13</sup>C{<sup>1</sup>H} NMR (126 MHz, CDCl<sub>3</sub>) δ 208.7, 156.4, 156.0, 80.6, 79.9, 73.7, 59.7, 35.9, 35.5, 28.3, 28.3. IR (film)/cm<sup>-1</sup> 3366, 2979, 2935, 1691, 1516, 1506, 1478, 1368, 1252, 1167, 914. HRMS calcd for C<sub>16</sub>H<sub>28</sub>N<sub>2</sub>NaO<sub>6</sub> [M+Na]<sup>+</sup> 367.1845; found 367.1846.

***tert*-Butyl (3-(1-hydroxycycloheptyl)-3-oxo-2-phenylpropyl)carbamate **4v****

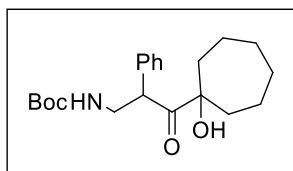

Following **GP2** with *tert*-Butyl 4-(1-hydroxycycloheptyl)-3-phenylazete-1(2*H*)-carboxylate **2v** as starting material, compound **4v** was obtained as a white waxy solid (96%, 87 mg). <sup>1</sup>H NMR (500 MHz, CDCl<sub>3</sub>) δ 7.34 – 7.29 (m, 2H, Ar-H), 7.29 – 7.24 (m, 3H, Ar-H overlapping CHCl<sub>3</sub> signal), 4.76 (bs, 1H, NH), 4.67 – 4.61 (m, 1H, NCH<sub>2</sub>CH), 3.51 – 3.40 (m, 2H, NCH<sub>2</sub>), 3.11 (bs, 1H, OH), 1.99 – 1.93 (m, 1H,

cycloheptyl-CH<sub>2</sub>), 1.69 – 1.45 (m, 10H, cycloheptyl-CH<sub>2</sub> overlapping H<sub>2</sub>O signal), 1.42 (s, 9H, 3 × CH<sub>3</sub>), 1.33 – 1.28 (m, 1H, cycloheptyl-CH<sub>2</sub>). <sup>13</sup>C{<sup>1</sup>H} NMR (126 MHz, CDCl<sub>3</sub>) δ 214.4, 156.0, 136.1, 129.2, 128.4, 127.9, 82.2, 79.8, 52.1, 44.9, 37.9, 37.2, 29.2, 29.1, 28.5, 23.0, 22.9. IR (film)/cm<sup>-1</sup> 3401, 2976, 2927, 1698, 1506, 1455, 1366, 1278, 1251, 1170, 945. HRMS calcd for C<sub>21</sub>H<sub>31</sub>NNaO<sub>4</sub> [M+Na]<sup>+</sup> 384.2151; found 384.2141.

***tert*-Butyl (3-((5*R*)-1-hydroxy-2-methyl-5-(prop-1-en-2-yl)cyclohex-2-en-1-yl)-3-oxopropyl)carbamate **4w****

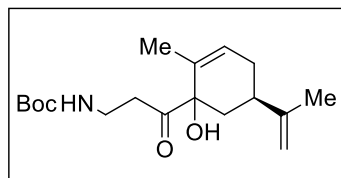

Following **GP2** with *tert*-Butyl 4-((5*R*)-1-hydroxy-2-methyl-5-(prop-1-en-2-yl)cyclohex-2-en-1-yl)azete-1(2*H*)-carboxylate **2w** as starting material, the title compound **4w** was obtained as white waxy solid (95%, 77 mg, dr = 95:5, absolute stereochemistry not assigned, [α]<sub>D</sub><sup>20</sup> = -123.0° (c = 1, CHCl<sub>3</sub>).

Compound **4w** was obtained in 98% yield (32 mg) following **GP3**. <sup>1</sup>H NMR (500

MHz, CDCl<sub>3</sub>) δ 5.83 – 5.80 (m, 1H, C=CH), 4.97 (bs, 1H, NH), 4.77 – 4.72 (m, 2H, C=CH<sub>2</sub>), 3.92 (s, 1H, OH), 3.43 – 3.37 (m, 2H, NCH<sub>2</sub>), 2.91 (dt, *J* = 18.5, 5.9 Hz, 1H, NCH<sub>2</sub>CH<sub>2</sub>), 2.74 (dt, *J* = 18.6, 5.3 Hz, 1H, NCH<sub>2</sub>CH<sub>2</sub>), 2.58 – 2.50 (m, 1H, CH), 2.27 – 2.20 (m, 1H, C=CHCH<sub>2</sub>), 2.10 – 2.02 (m, 1H, C=CHCH<sub>2</sub>), 1.93 – 1.88 (m, 1H, OHCH<sub>2</sub>), 1.83 (d, *J* = 12.9 Hz, 1H, OHCH<sub>2</sub>), 1.72 (s, 3H, CH<sub>3</sub>C=CH<sub>2</sub>), 1.52 – 1.50 (m, 3H, CH<sub>3</sub>C=CH), 1.41 (s, 9H, 3 × CH<sub>3</sub>). <sup>13</sup>C{<sup>1</sup>H} NMR (126 MHz, CDCl<sub>3</sub>) δ 213.2, 156.0, 147.8, 133.2, 128.7, 110.1, 80.3, 79.6, 39.7, 39.3, 38.1, 35.4, 30.2, 28.5, 20.7, 17.5. IR (film)/cm<sup>-1</sup> 3407, 2976, 2920, 1694, 1506, 1451, 1366, 1282, 1251, 1172, 890. HRMS calcd for C<sub>18</sub>H<sub>29</sub>NNaO<sub>4</sub> [M+Na]<sup>+</sup> 346.1994; found 346.2001.

***tert*-Butyl (3-((8*R*,9*S*,13*S*,14*S*,17*S*)-17-hydroxy-3-methoxy-13-methyl-7,8,9,11,12,13,14,15,16,17-decahydro-6*H*-cyclopenta[*a*]phenanthren-17-yl)-3-oxopropyl)carbamate **4z****

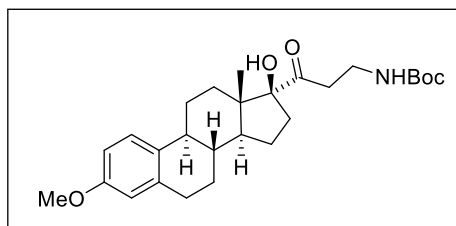

Following **GP2** with *tert*-Butyl 4-((8*R*,9*S*,13*S*,14*S*,17*S*)-17-hydroxy-3-methoxy-13-methyl-7,8,9,11,12,13,14,15,16,17-decahydro-6*H*-cyclopenta[*a*]phenanthren-17-yl)azete-1(2*H*)-carboxylate **2z** as starting material, compound **4z** was obtained as a white waxy solid (95%, 109 mg) [ $\alpha$ ]<sub>D</sub><sup>20</sup> = +6,6° (c = 0.4, CHCl<sub>3</sub>). Compound **4z** was obtained in 96% yield (44 mg) following **GP3**. **<sup>1</sup>H NMR** (500 MHz, CDCl<sub>3</sub>)  $\delta$  7.13 (d, *J* = 8.6 Hz, 1H, Ar-H), 6.69 (dd, *J* = 8.6, 2.7 Hz, 1H, Ar-H), 6.62 (d, *J* = 2.6 Hz, 1H, Ar-H), 5.03 (bs, 1H, NH), 3.77 (s, 3H, OCH<sub>3</sub>), 3.50 – 3.33 (m, 2H, NCH<sub>2</sub>), 2.98 – 2.90 (m, 1H, NCH<sub>2</sub>CH<sub>2</sub>), 2.87 – 2.78 (m, 3H, 1H NCH<sub>2</sub>CH<sub>2</sub> and 2H CH<sub>2</sub>), 2.69 (bs, 1H, OH), 2.37 – 2.29 (m, 1H, CH<sub>2</sub>), 2.29 – 2.23 (m, 1H, CH<sub>2</sub>), 2.16 – 2.09 (m, 1H, CH), 1.93 – 1.87 (m, 1H, CH<sub>2</sub>), 1.86 – 1.74 (m, 2H, CH<sub>2</sub>), 1.71 – 1.65 (m, 1H, CH), 1.64 – 1.61 (m, 1H, CH<sub>2</sub>), 1.52 – 1.35 (m, 13H, 1H CH, 3H CH<sub>2</sub> and 9H C(CH<sub>3</sub>)<sub>3</sub>), 1.13 – 1.06 (m, 1H, CH<sub>2</sub>), 0.96 (s, 3H, CH<sub>3</sub>). **<sup>13</sup>C{<sup>1</sup>H} NMR** (126 MHz, CDCl<sub>3</sub>)  $\delta$  216.0, 157.7, 156.2, 138.1, 132.4, 126.3, 114.0, 111.7, 91.1, 79.5, 55.4, 48.7, 48.5, 43.5, 40.9, 39.5, 36.1, 36.0, 33.5, 28.6, 27.5, 26.5, 24.5, 14.3. **IR** (film)/cm<sup>-1</sup> 3401, 2918, 1692, 1609, 1501, 1392, 1366, 1254, 1170, 1047, 730. **HRMS** calcd for C<sub>27</sub>H<sub>39</sub>NNaO<sub>5</sub> [M+Na]<sup>+</sup> 480.2726; found 480.2734.

## 7. Copy of NMR spectra

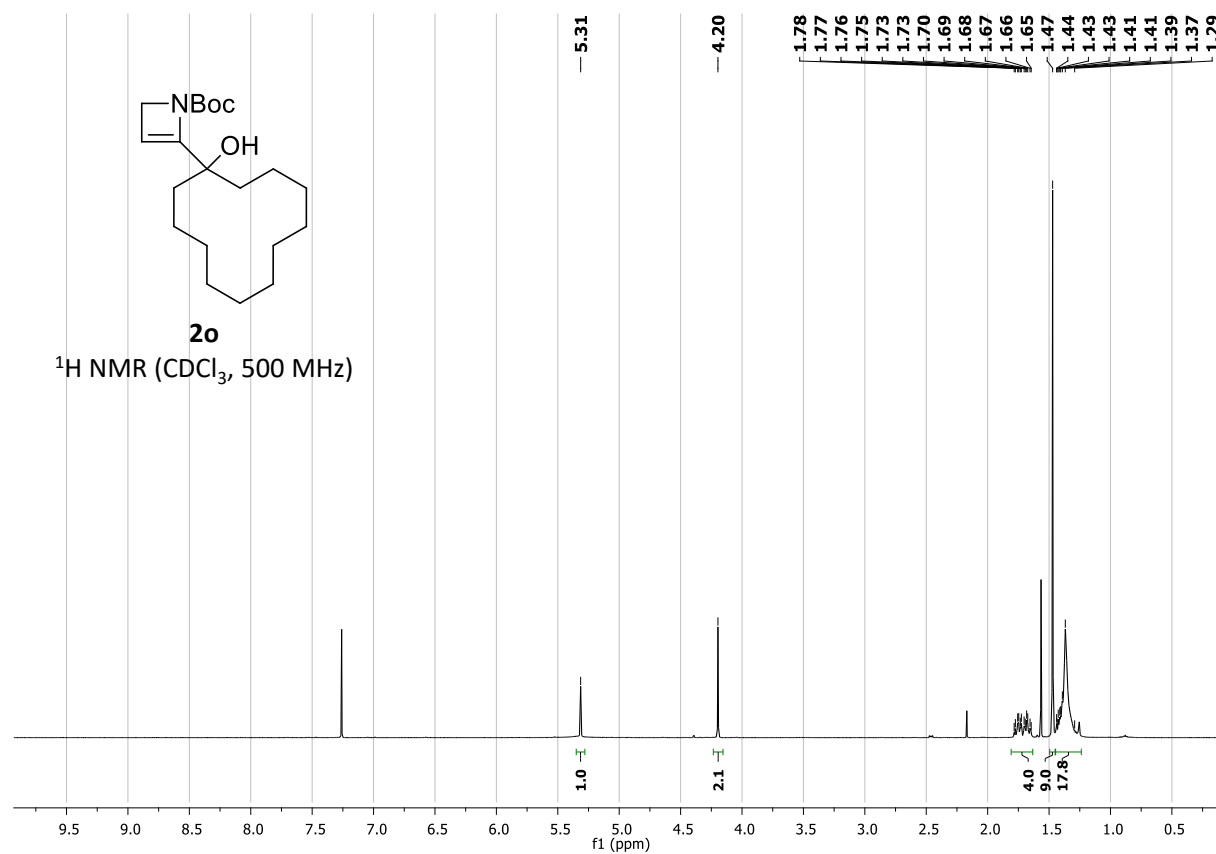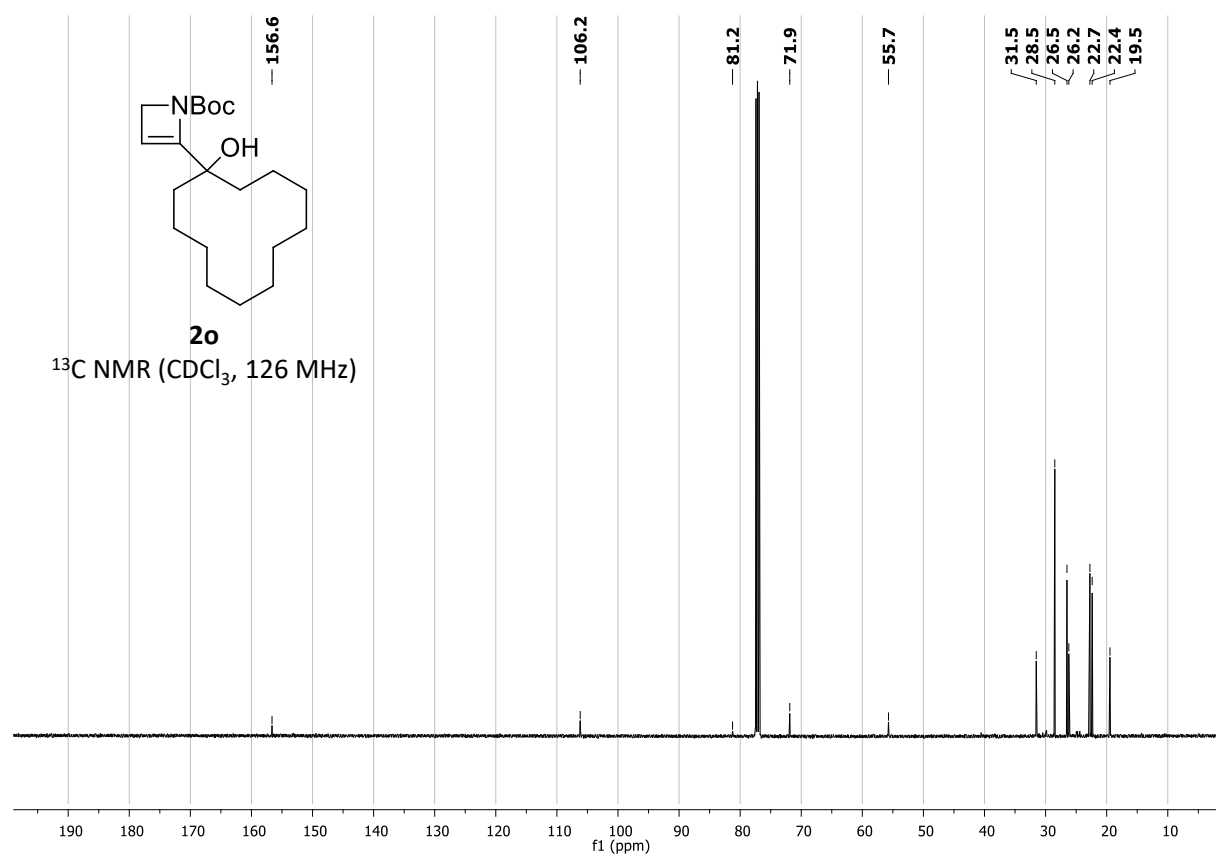

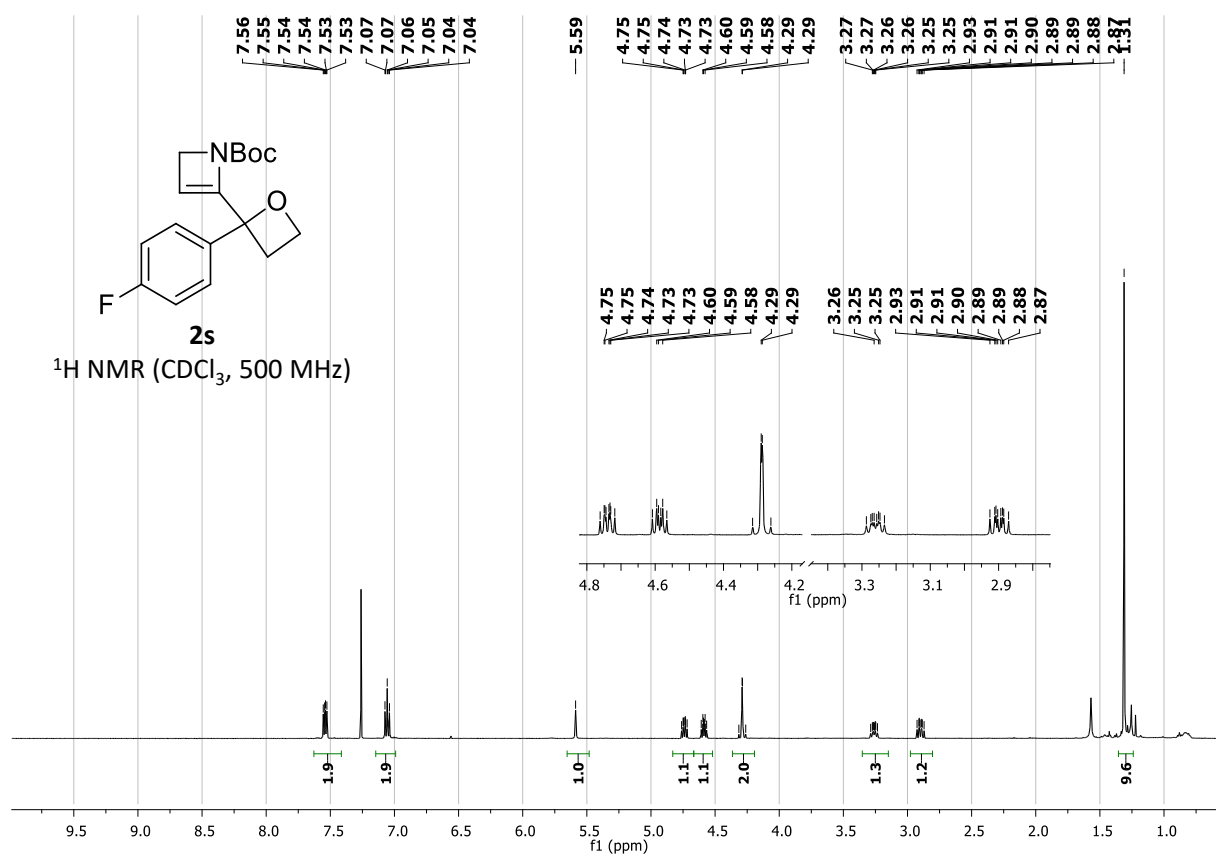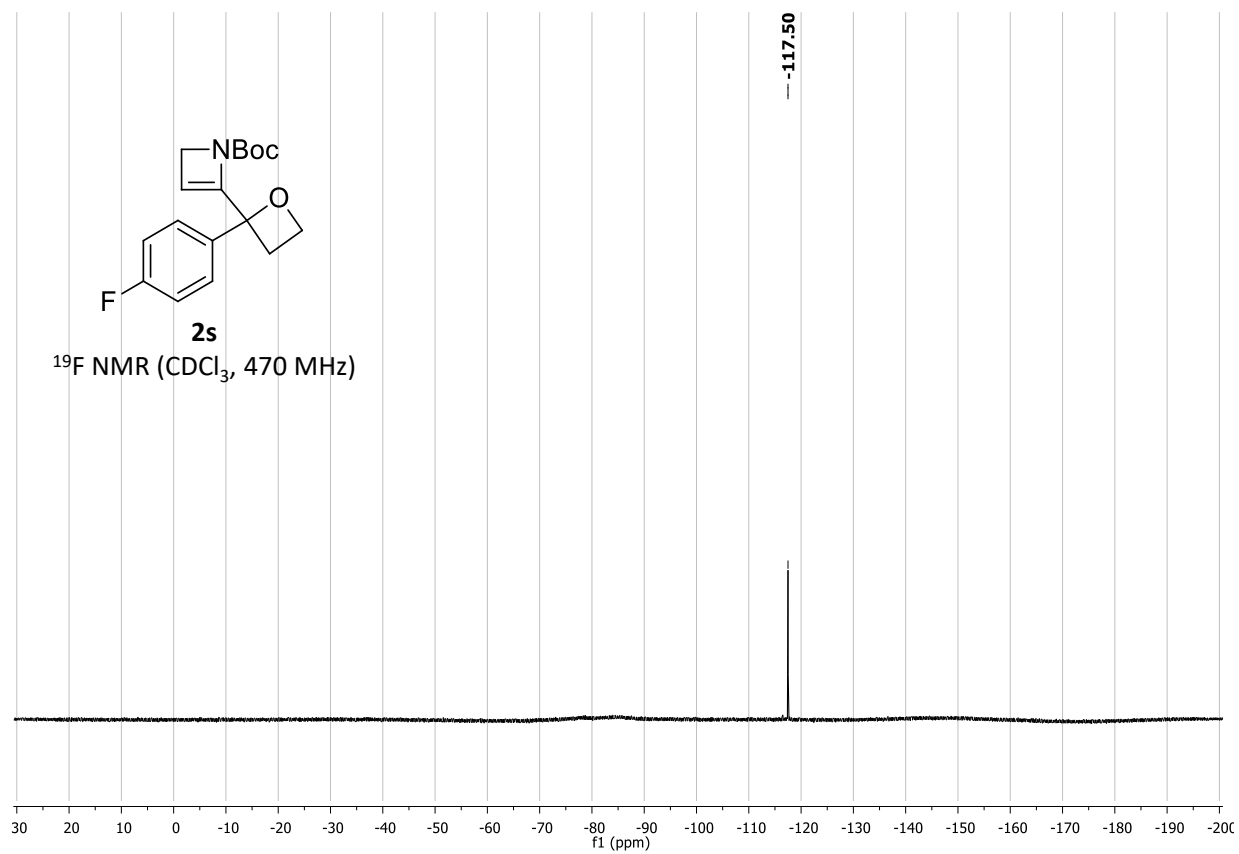



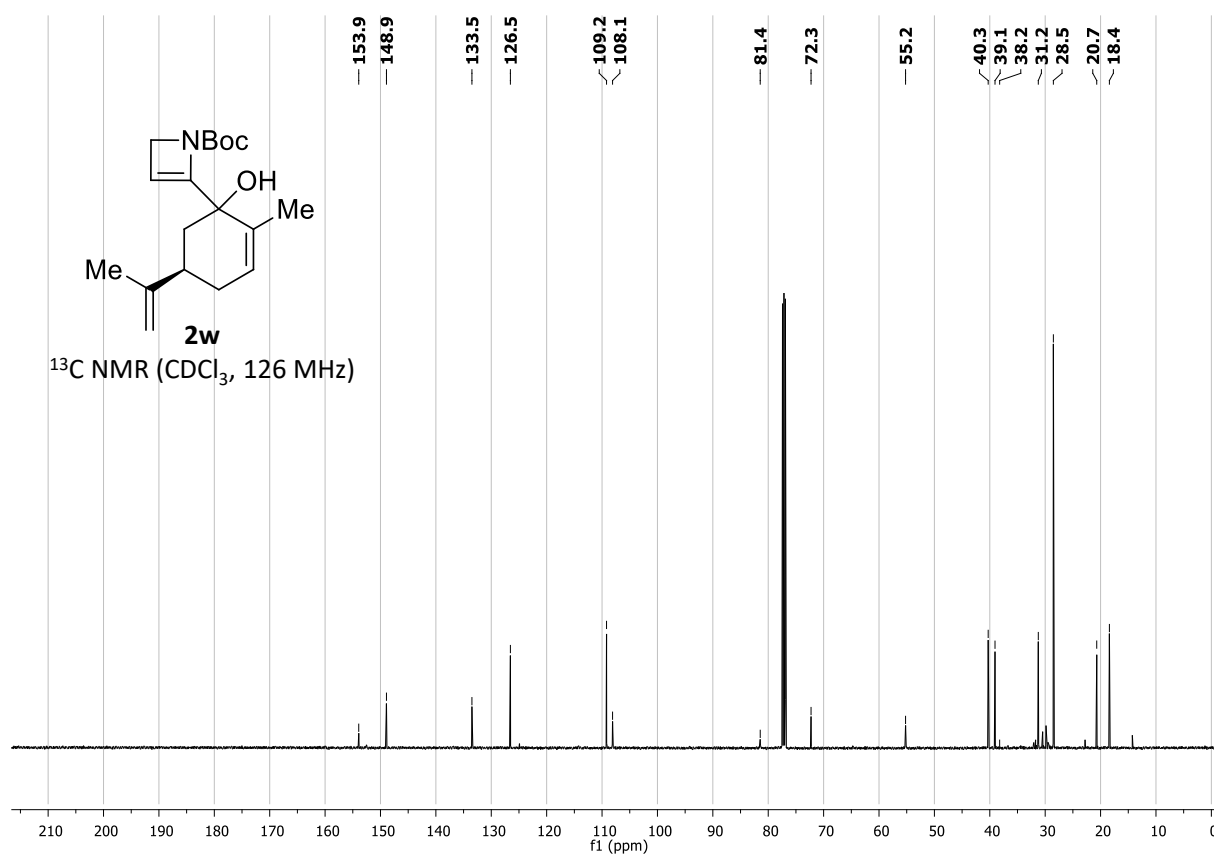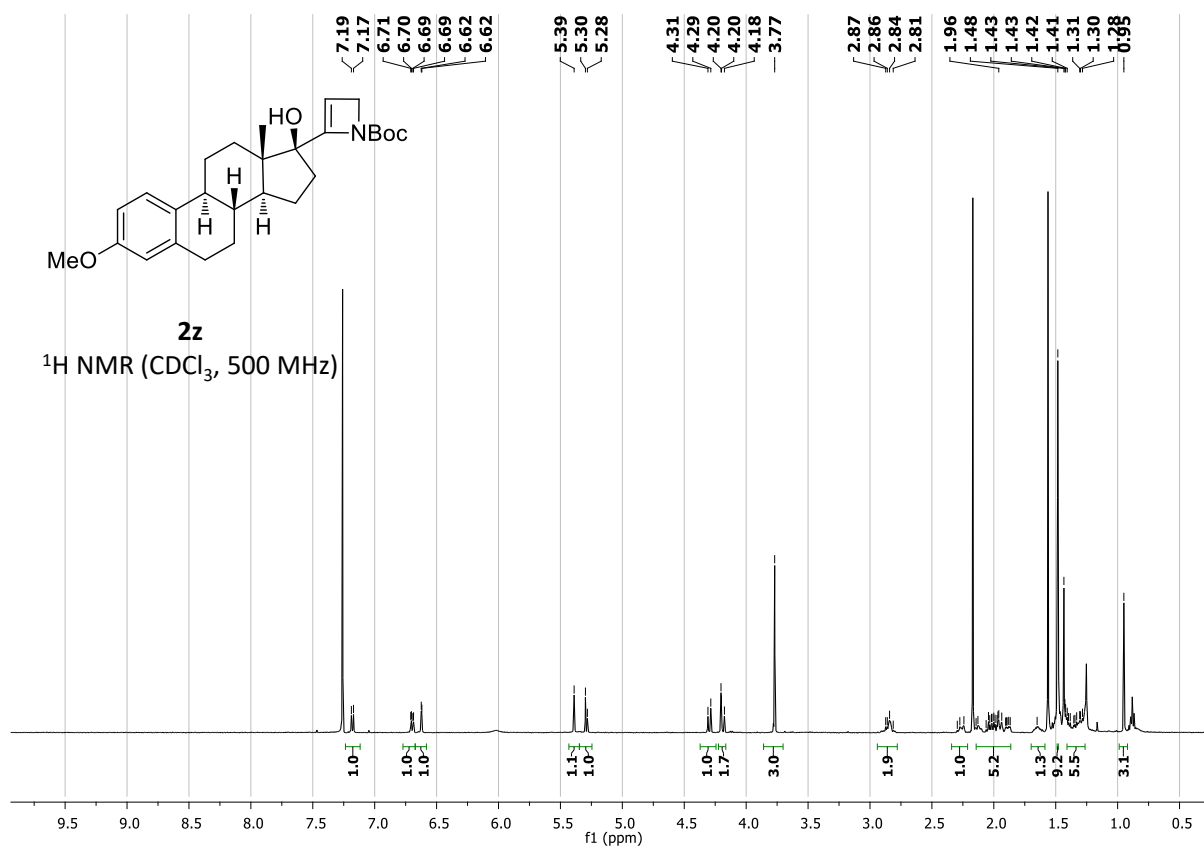



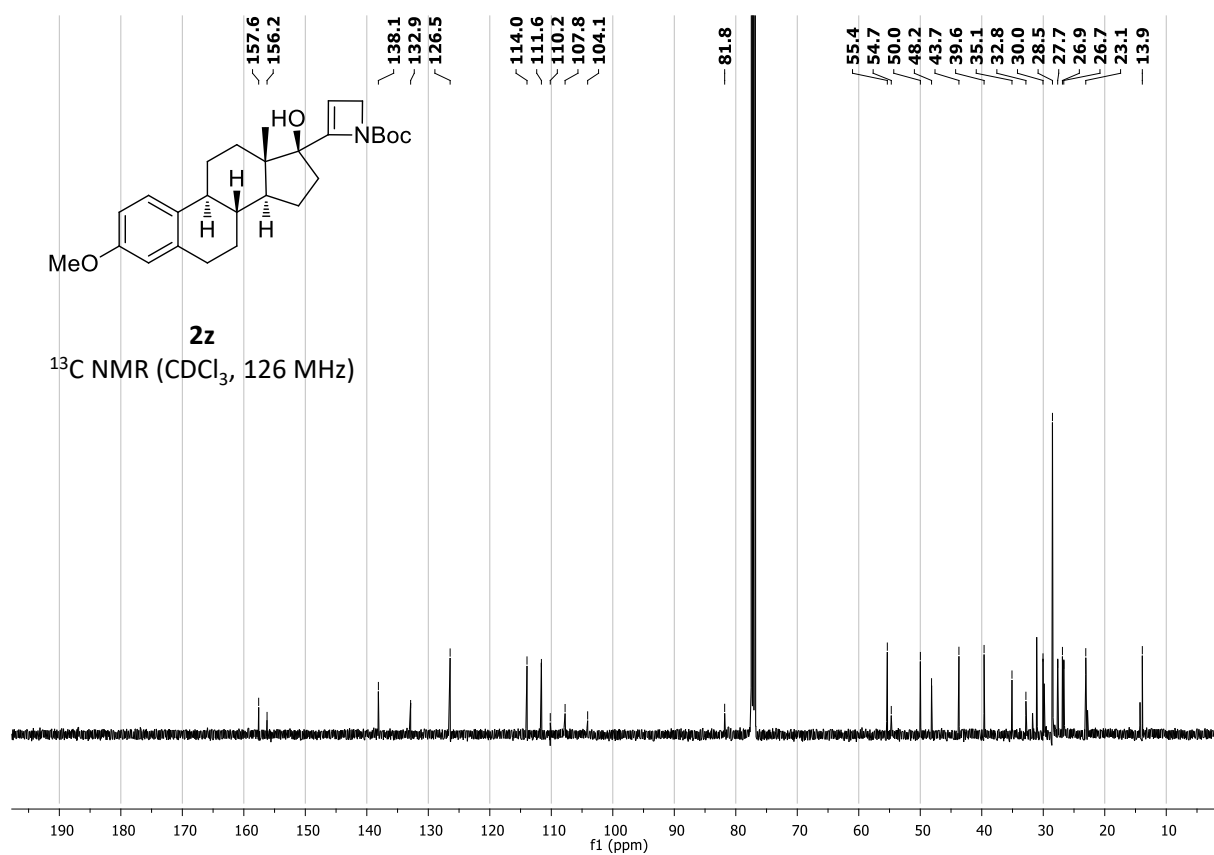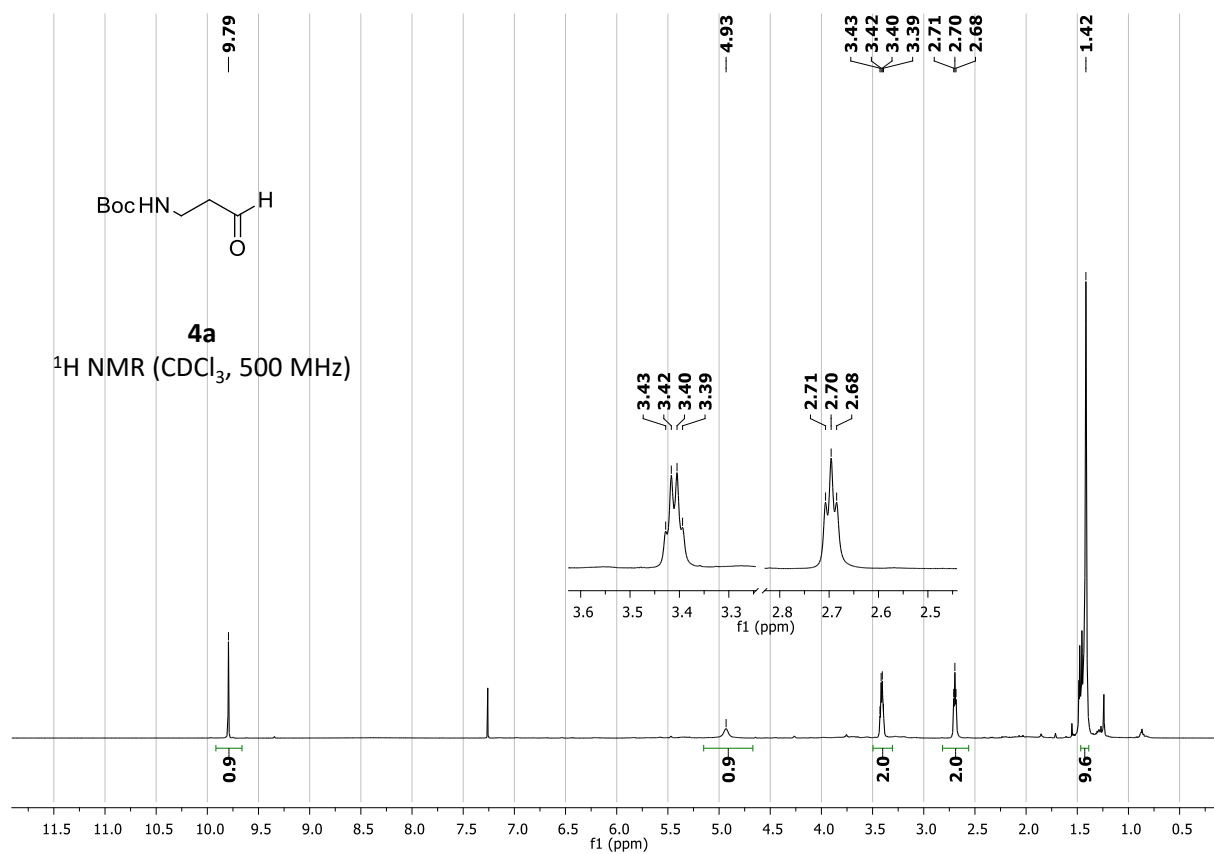

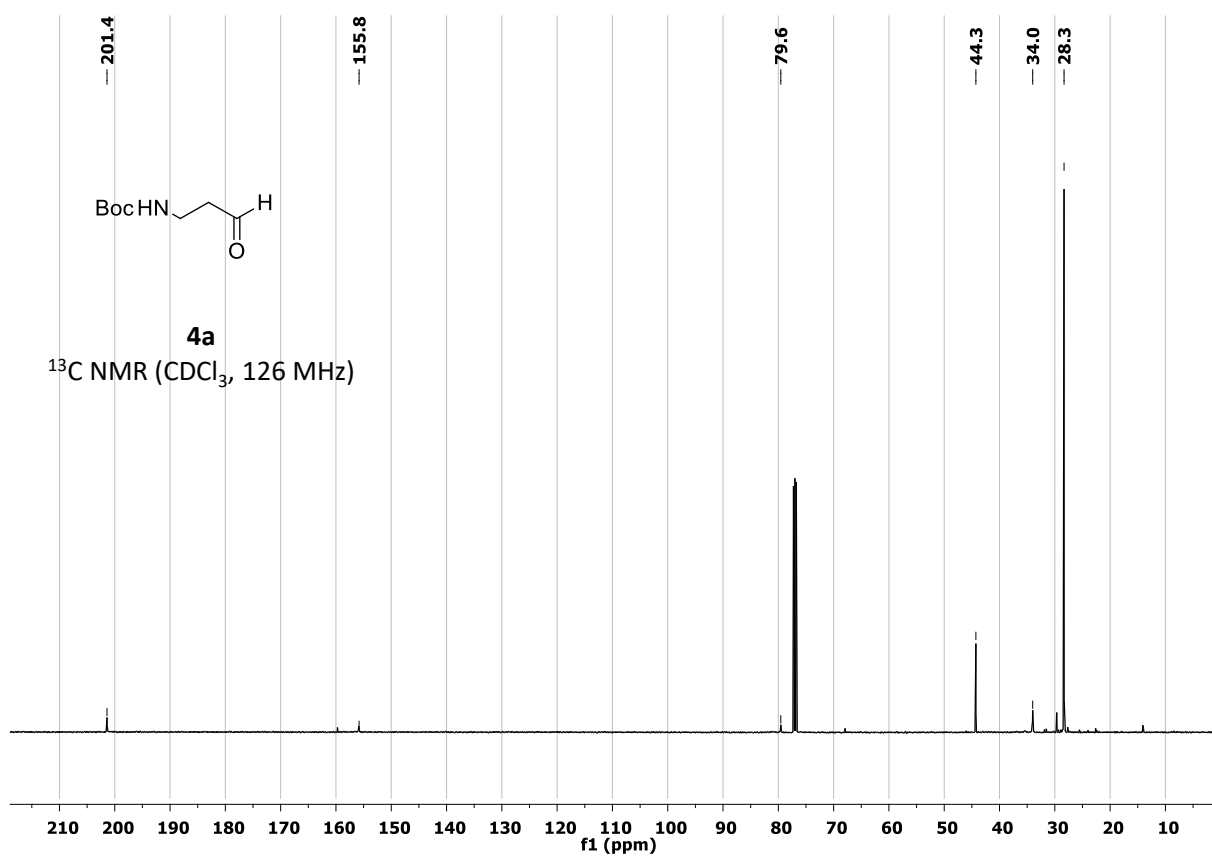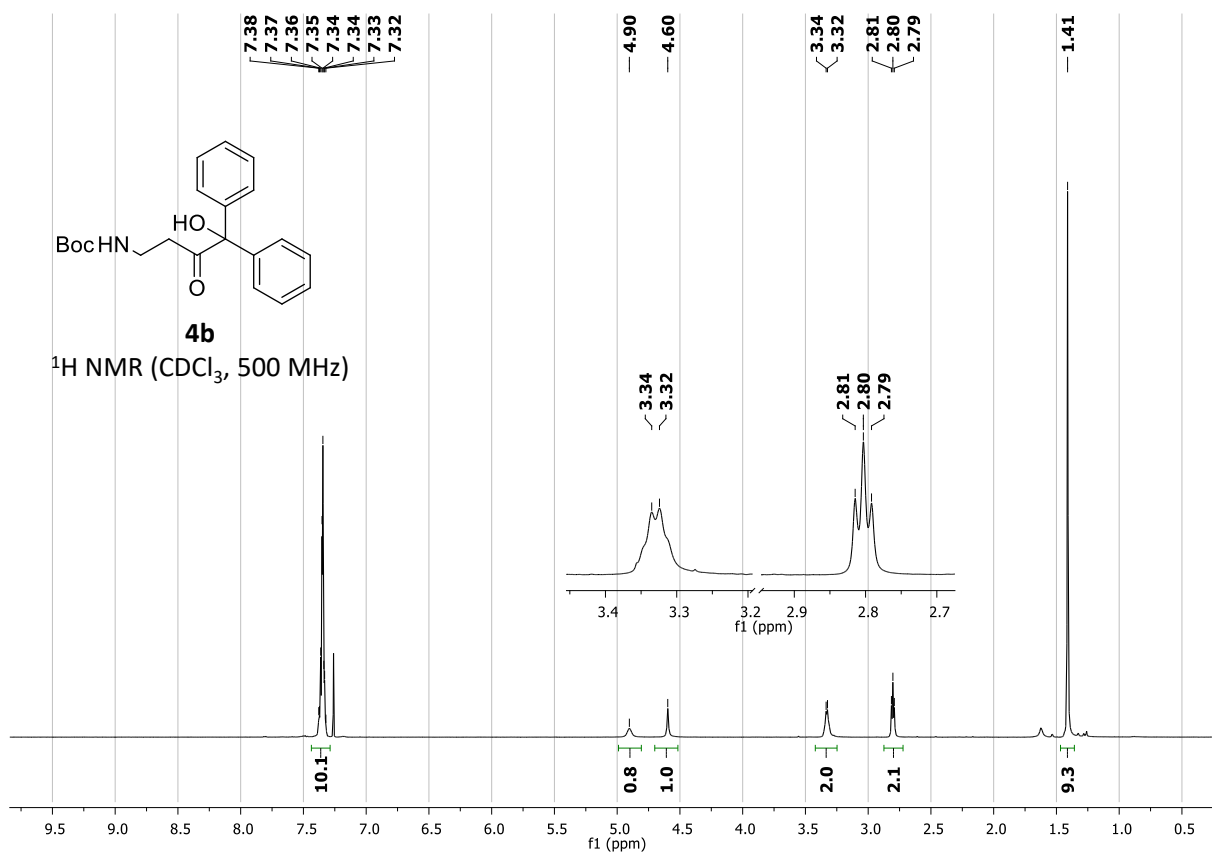

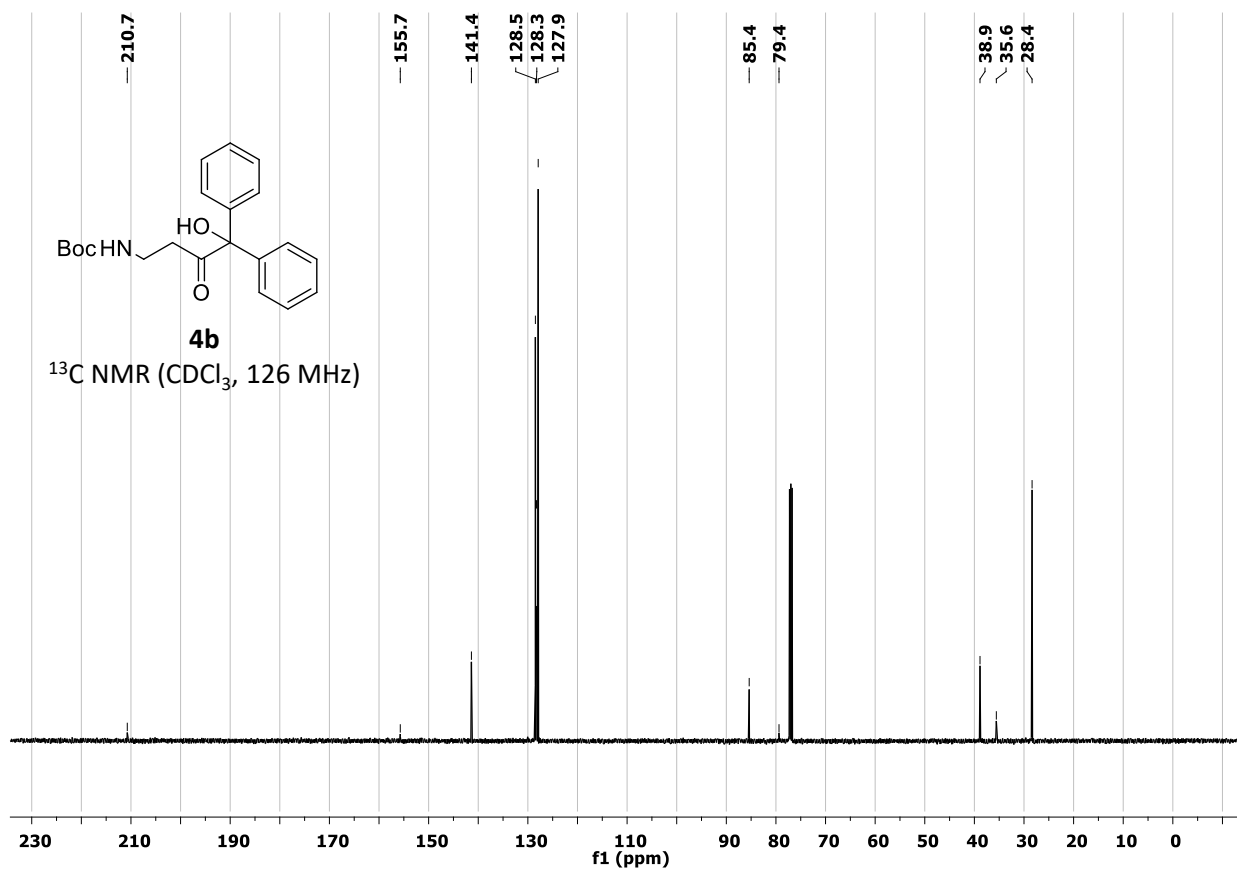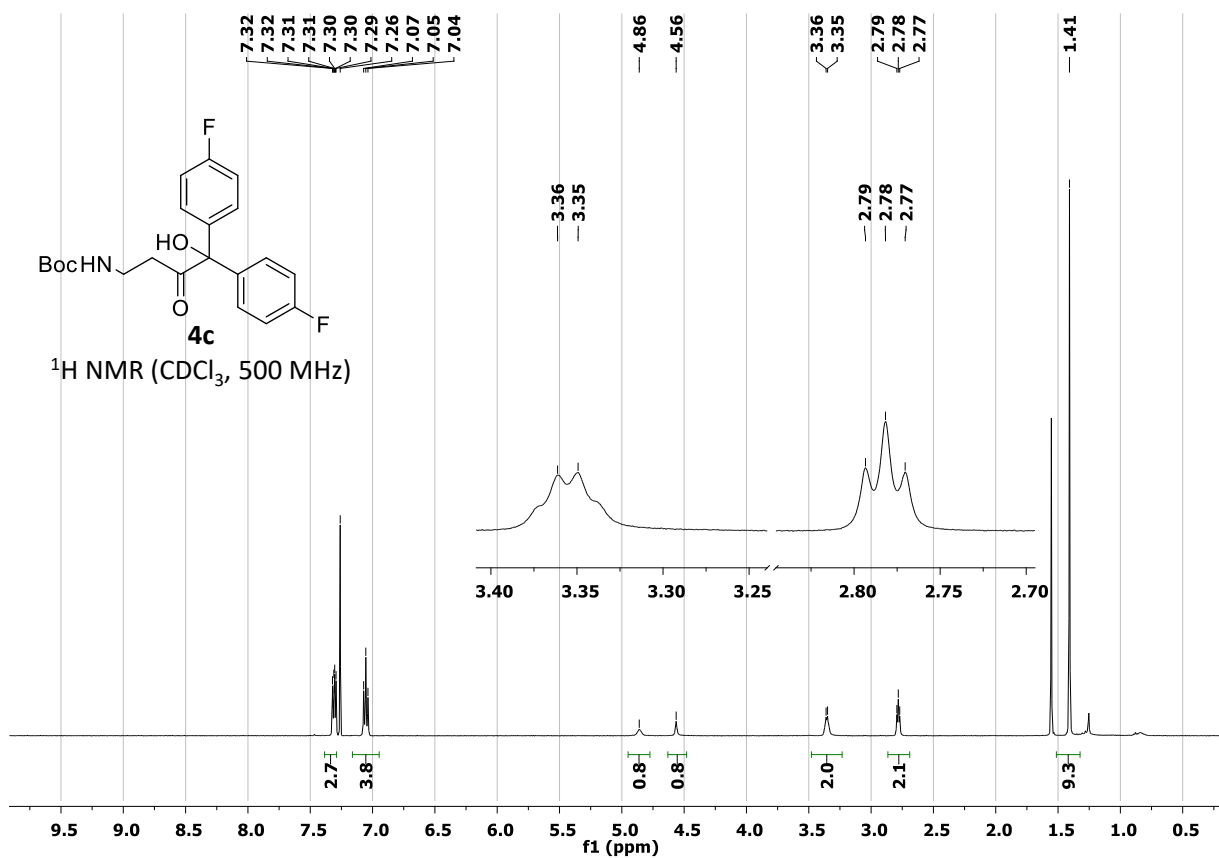

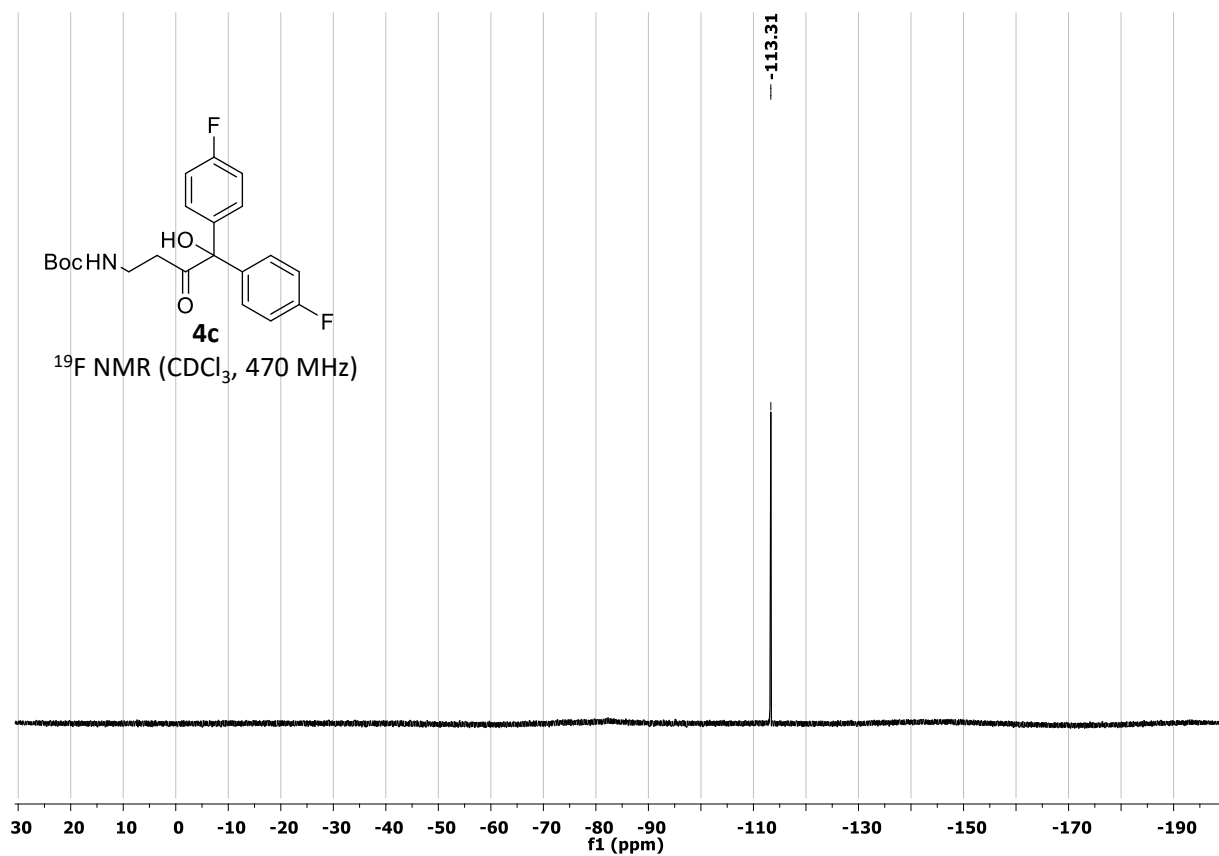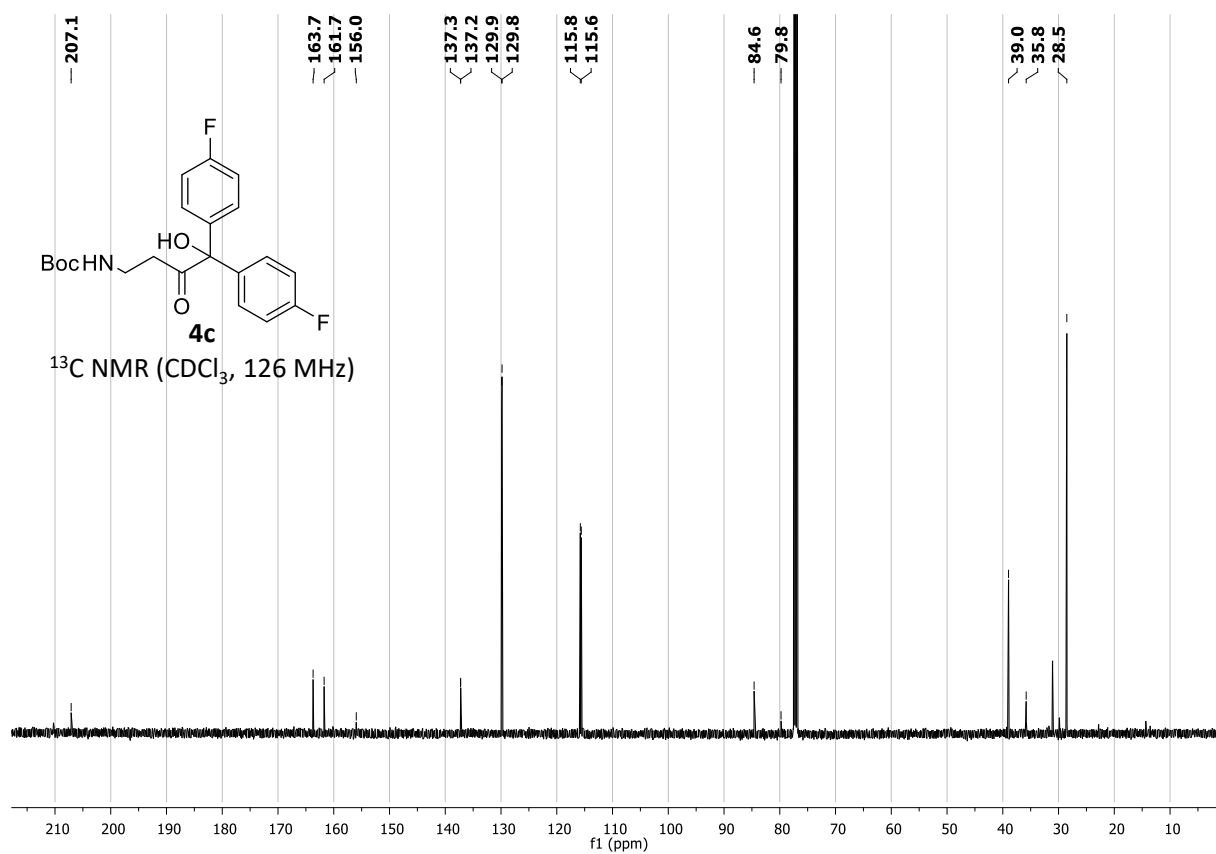

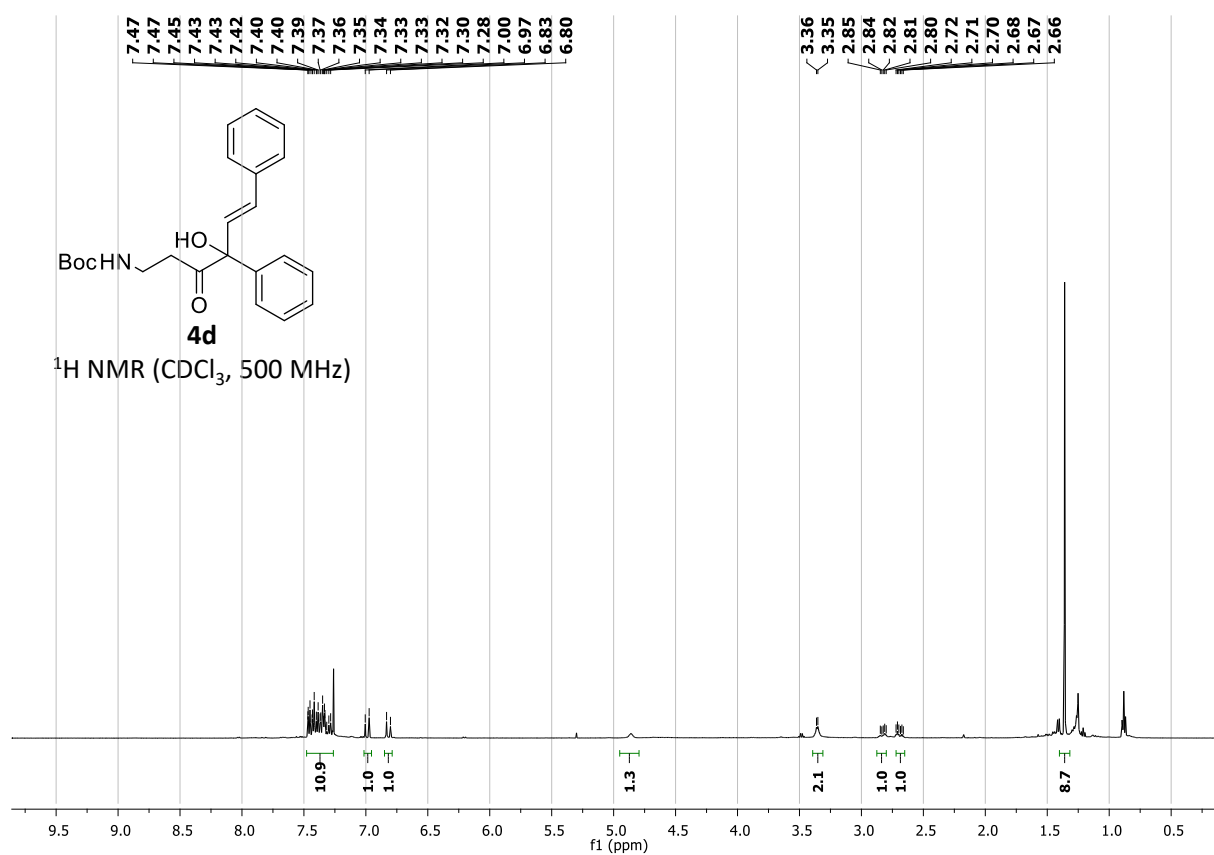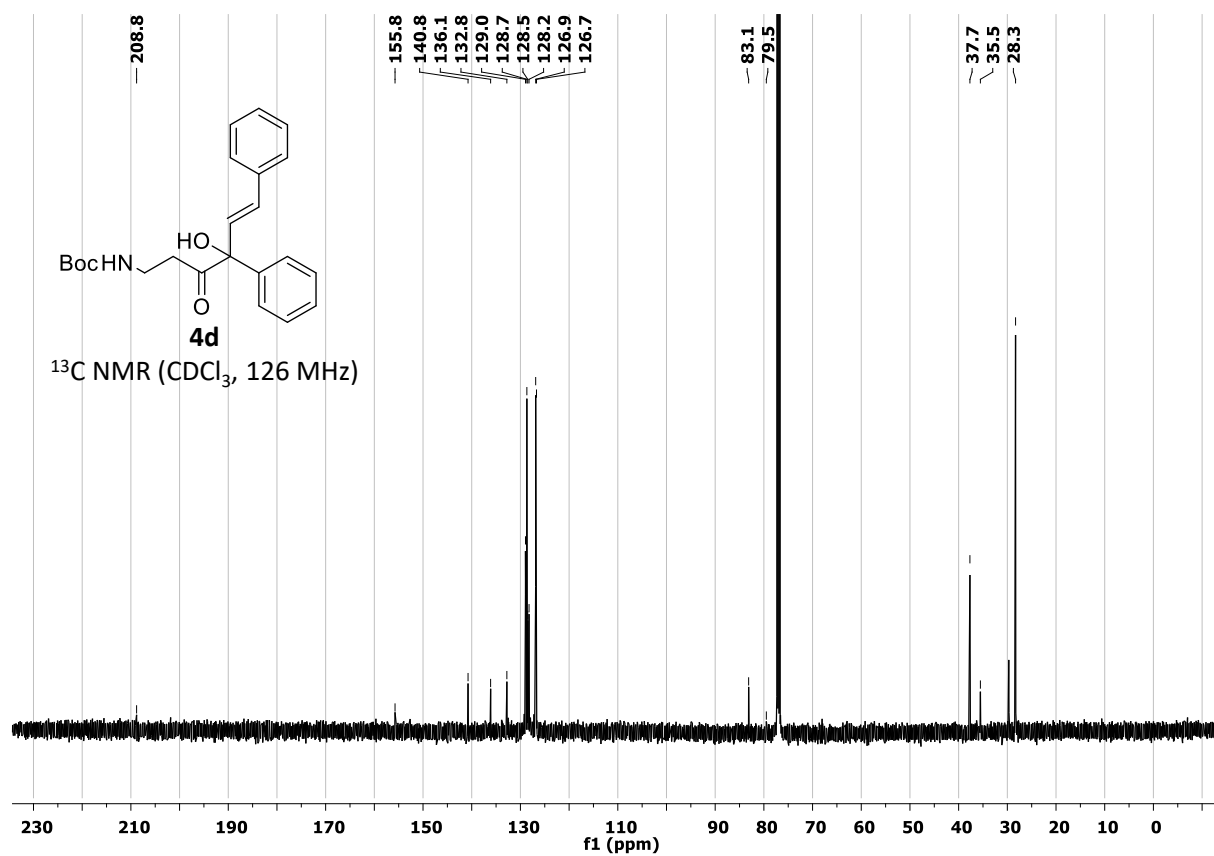

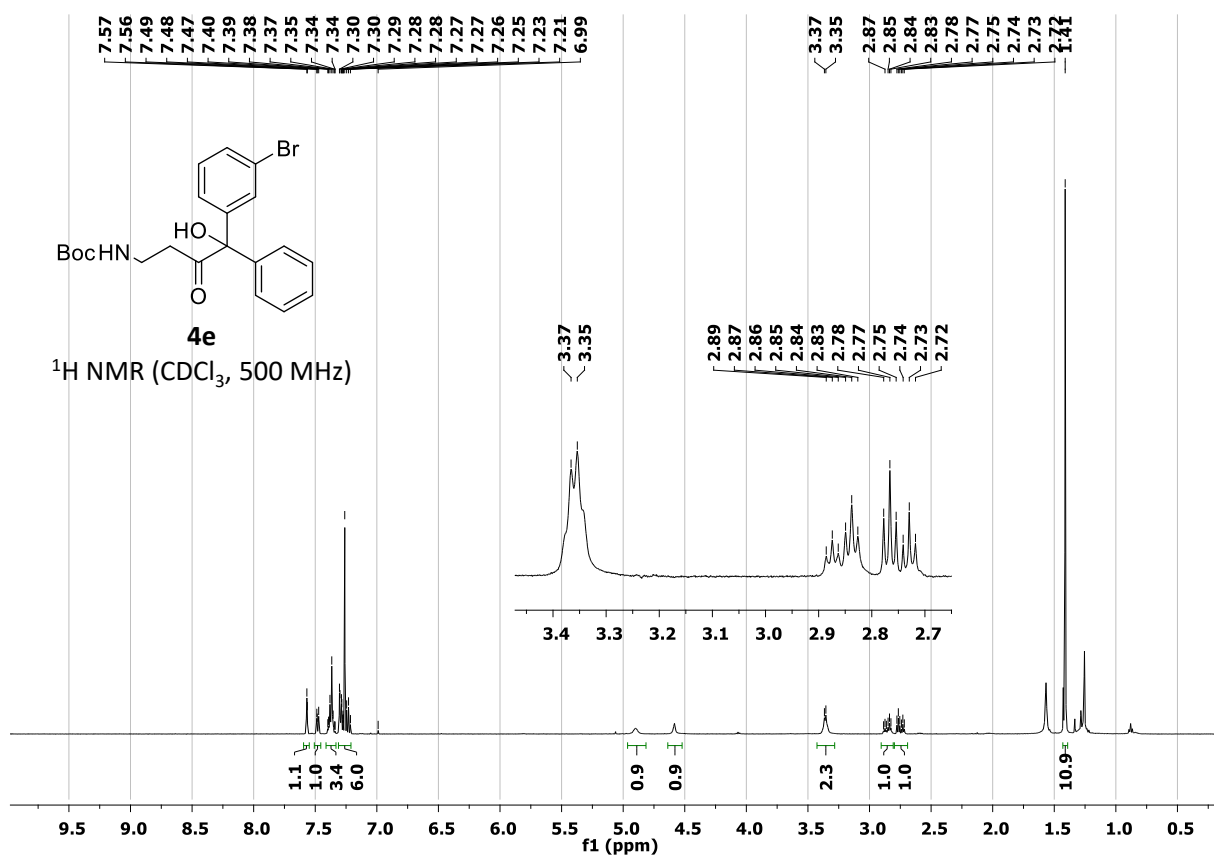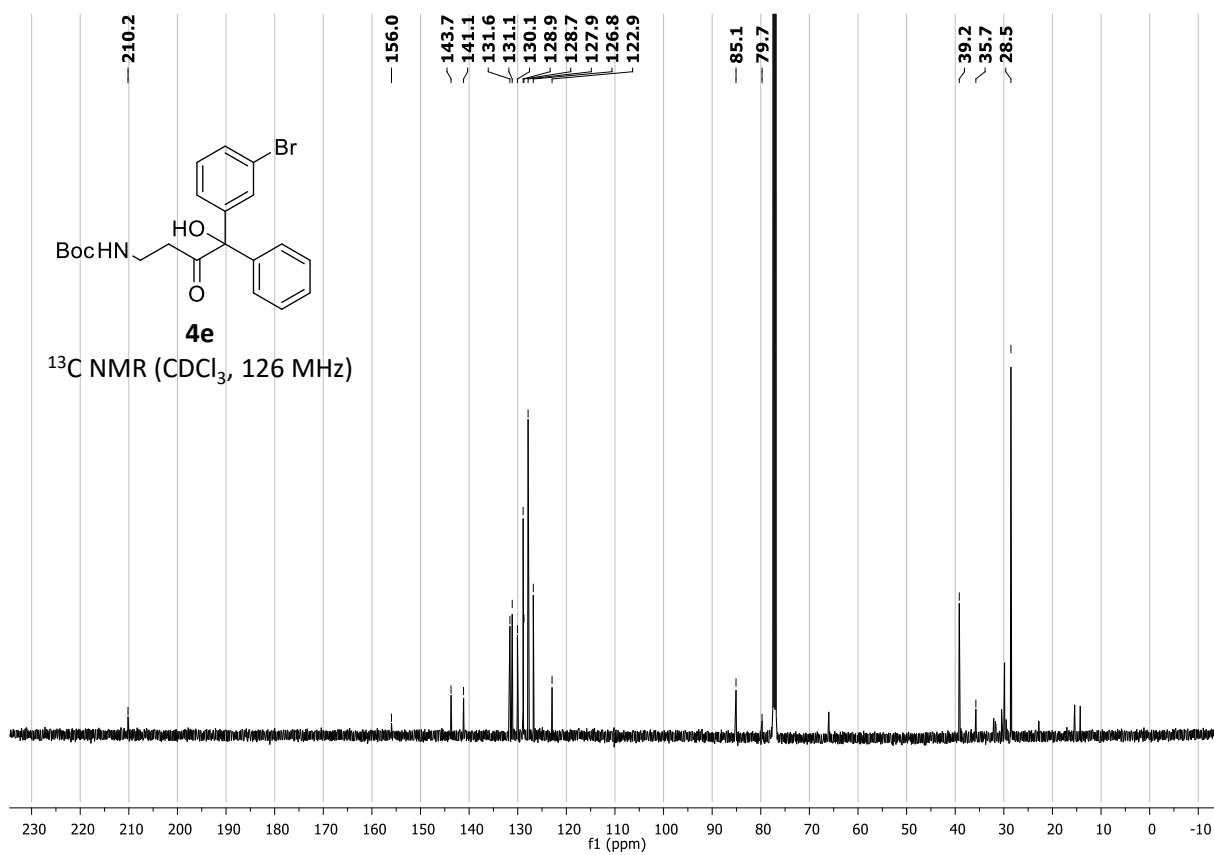

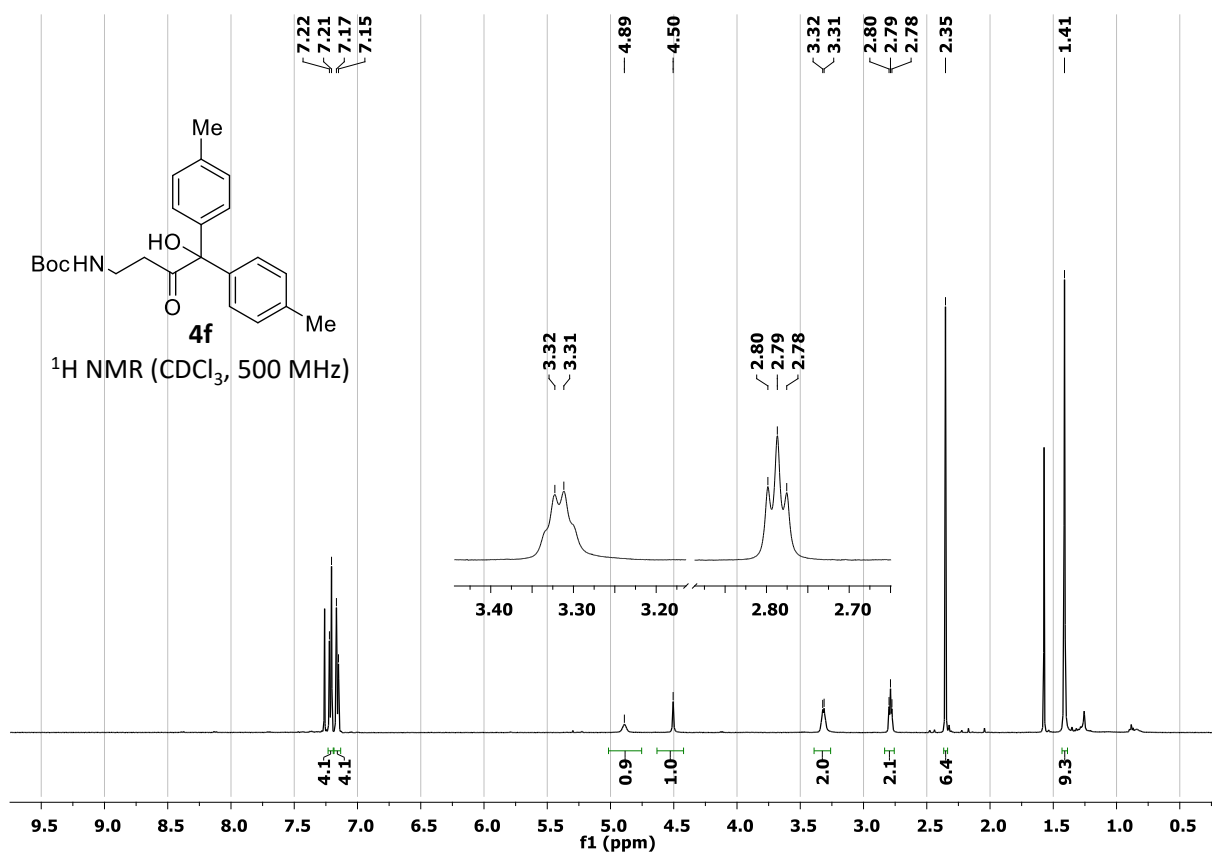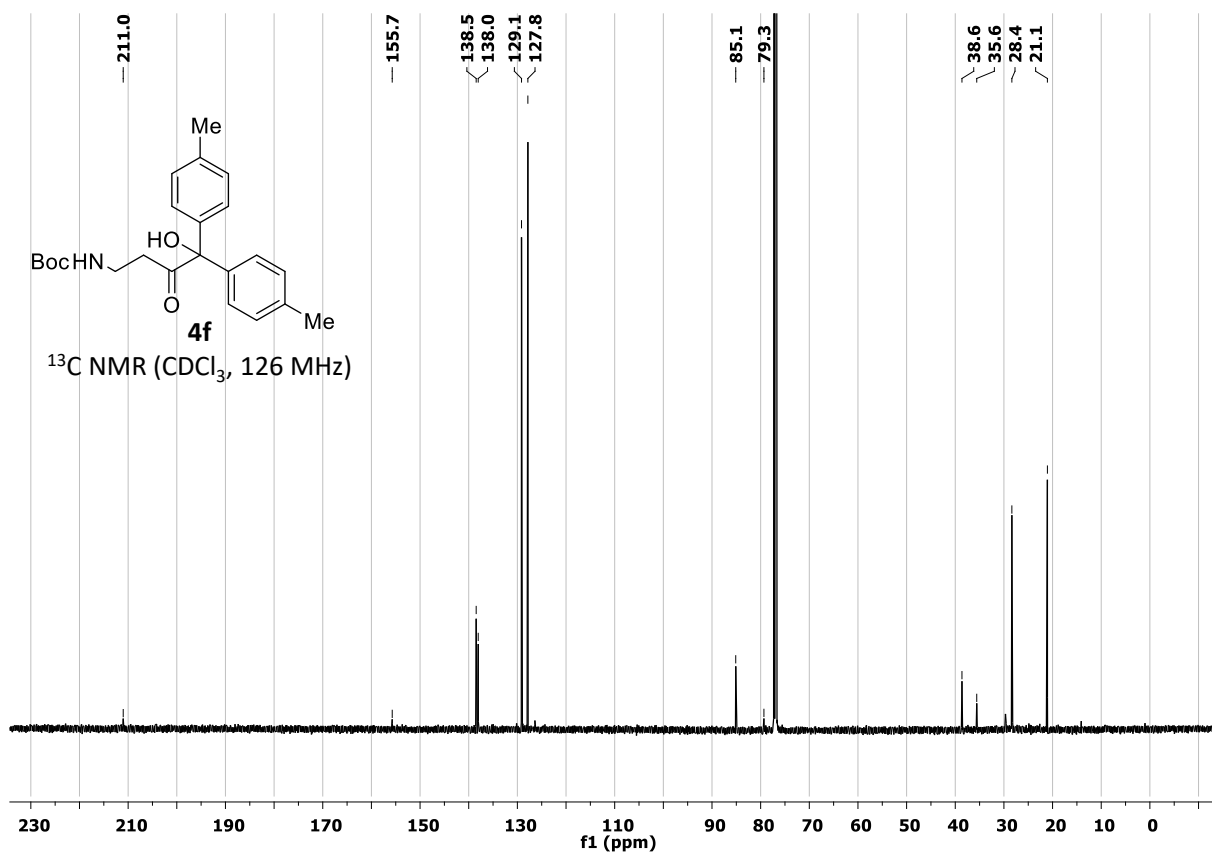

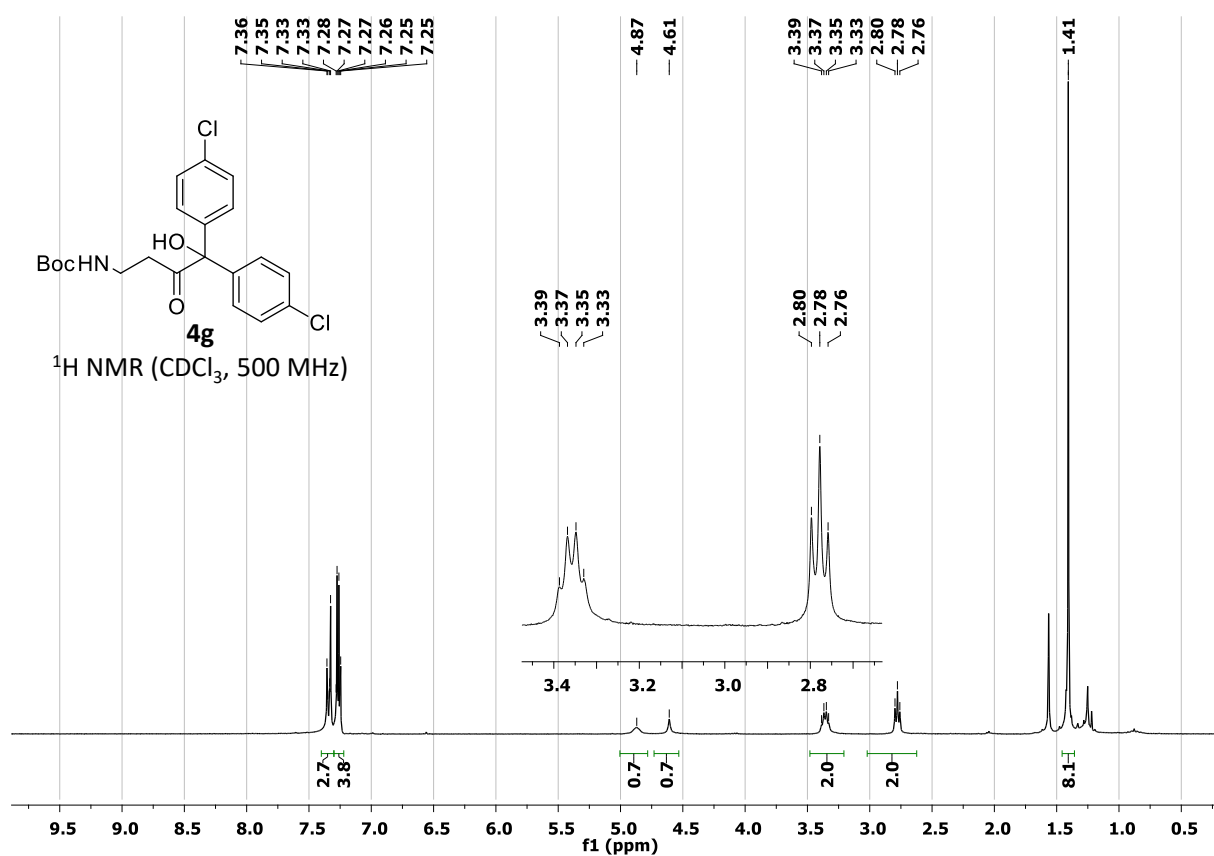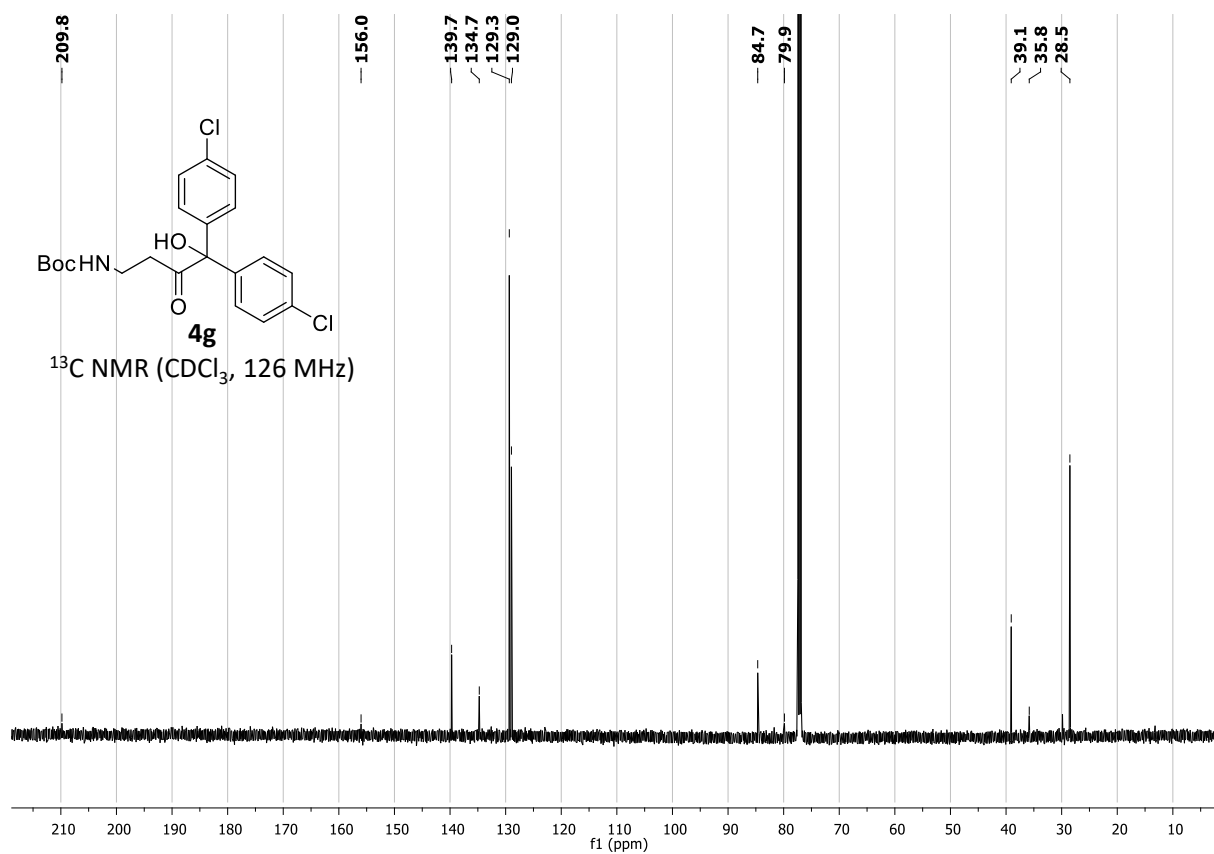



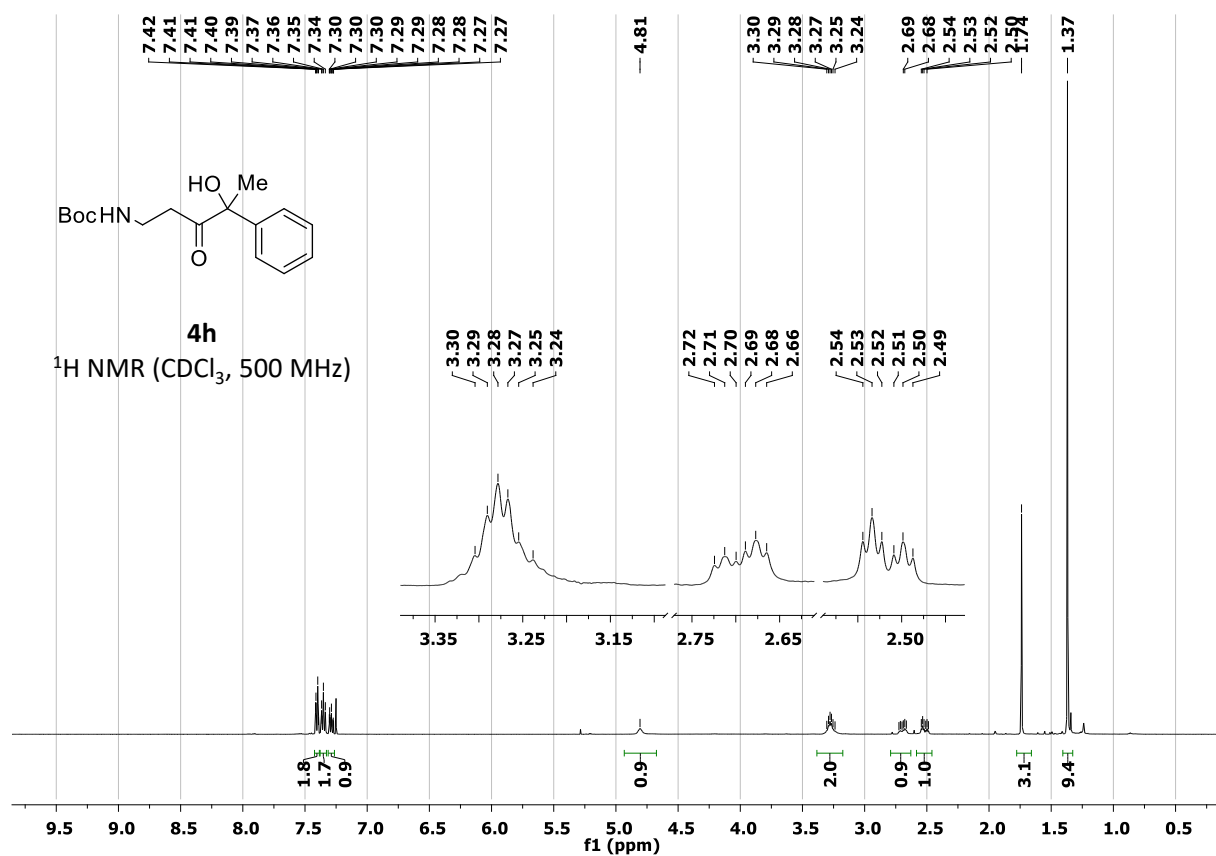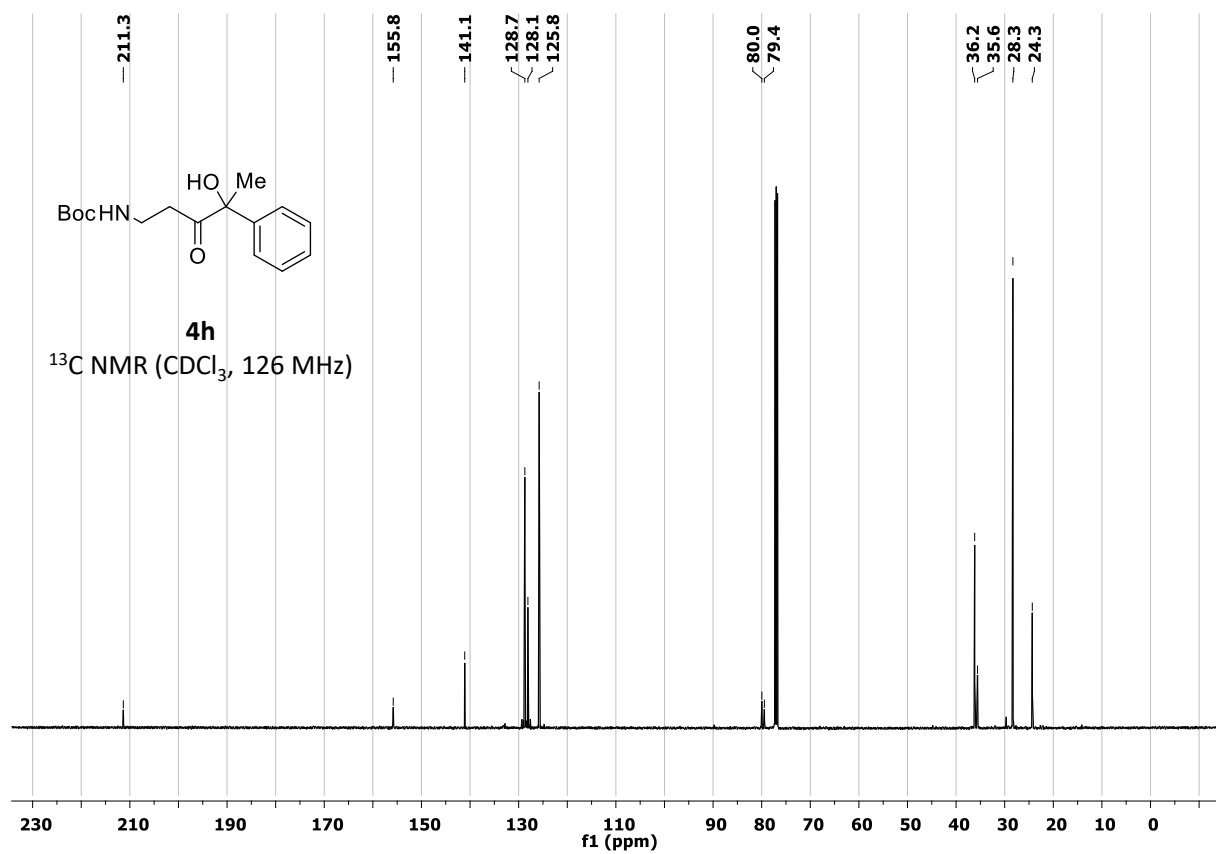

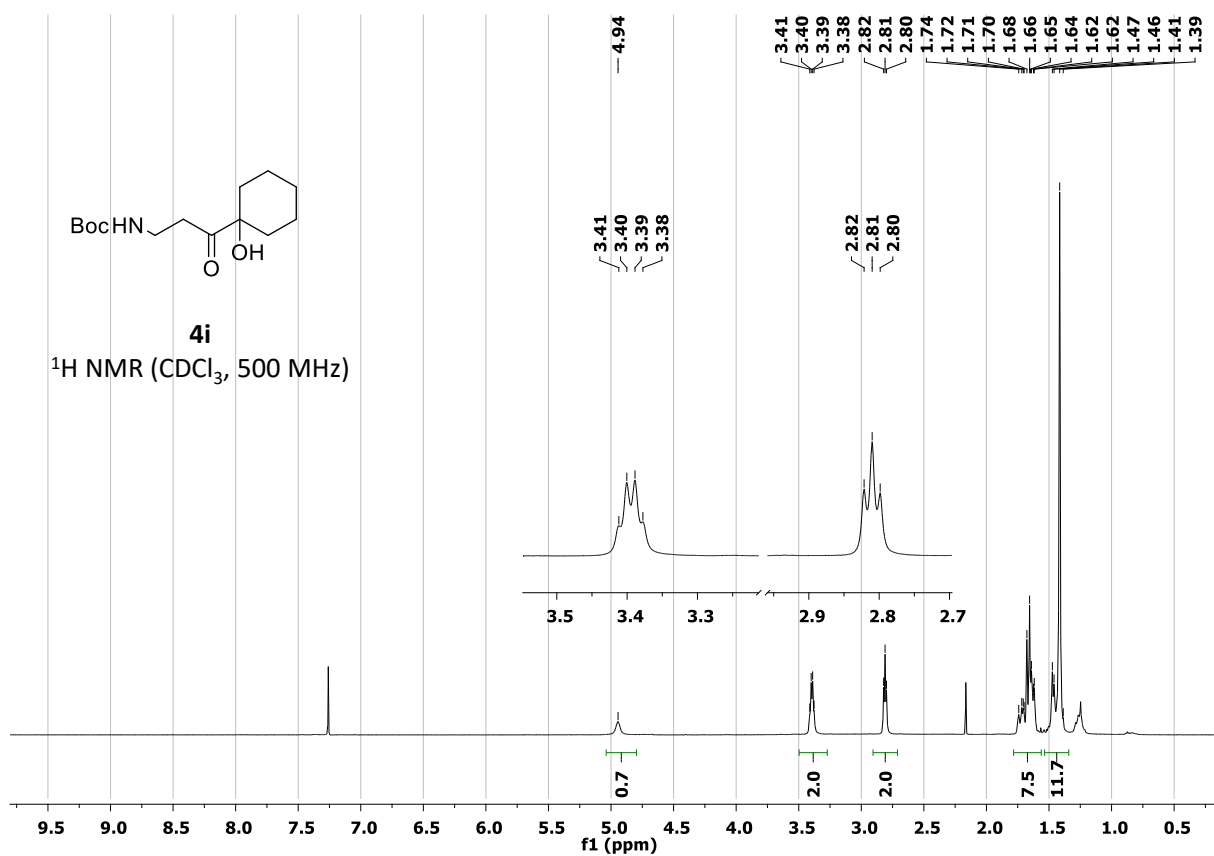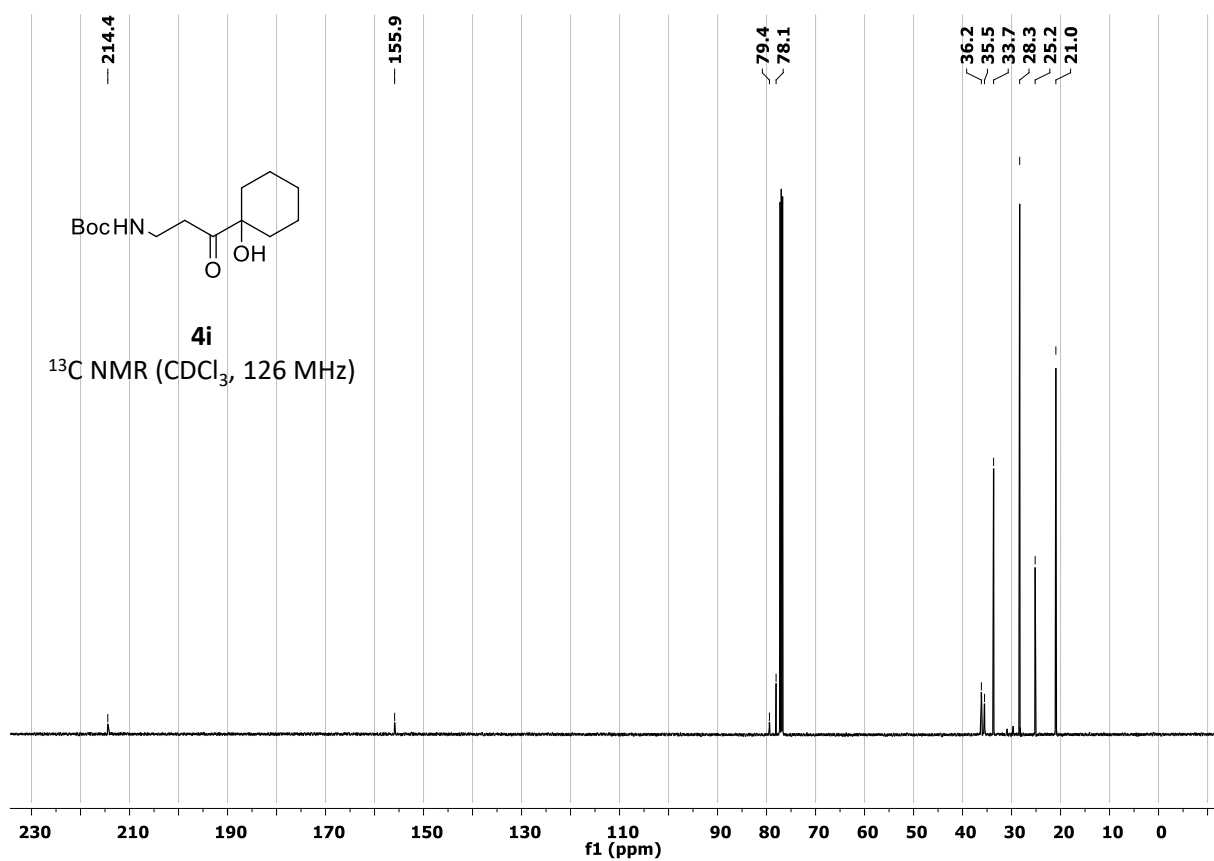

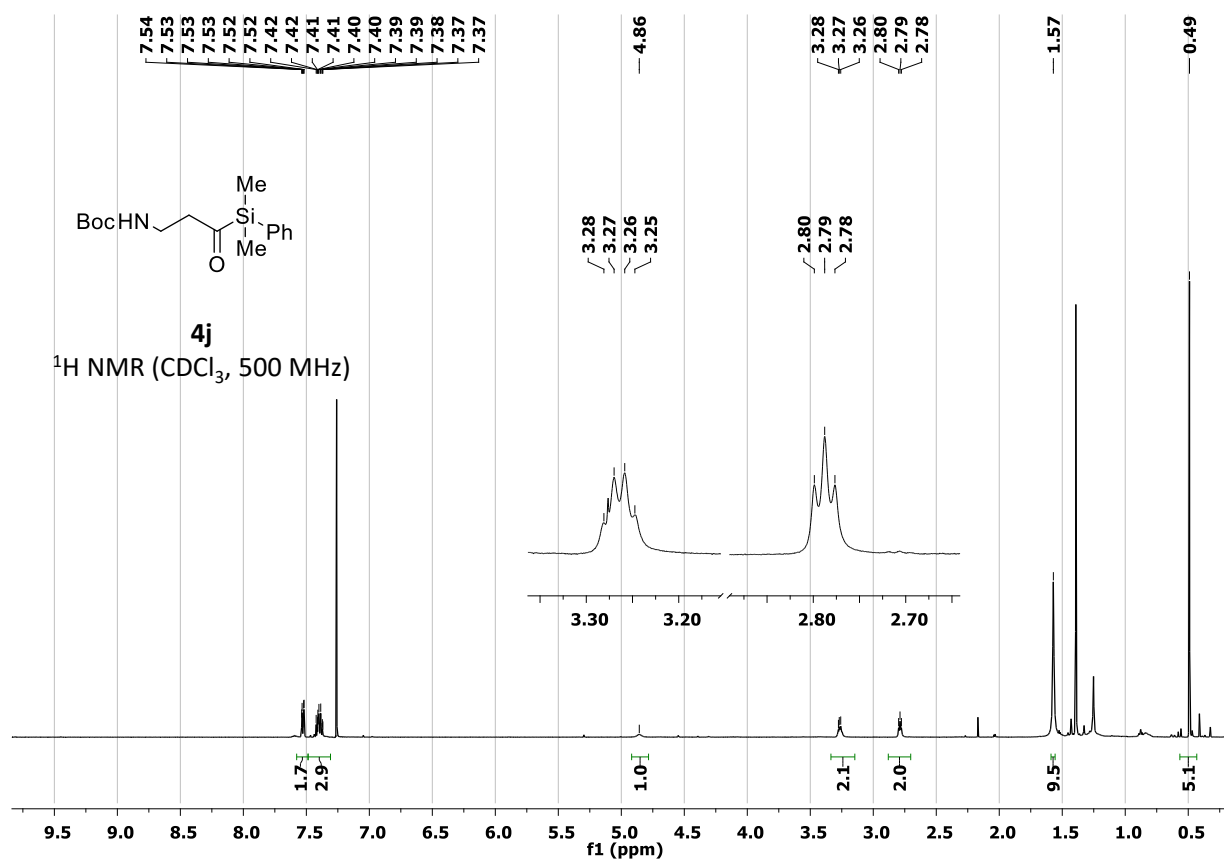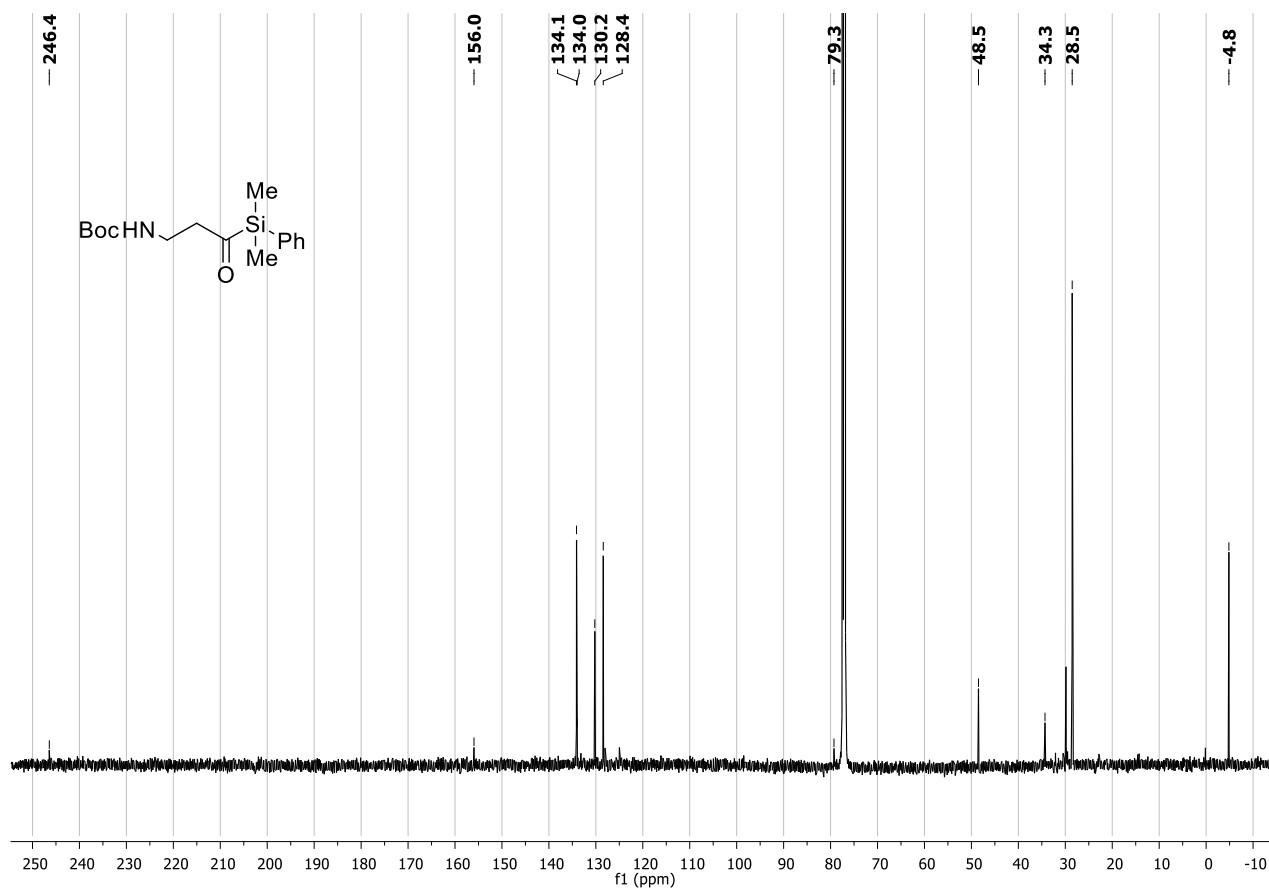

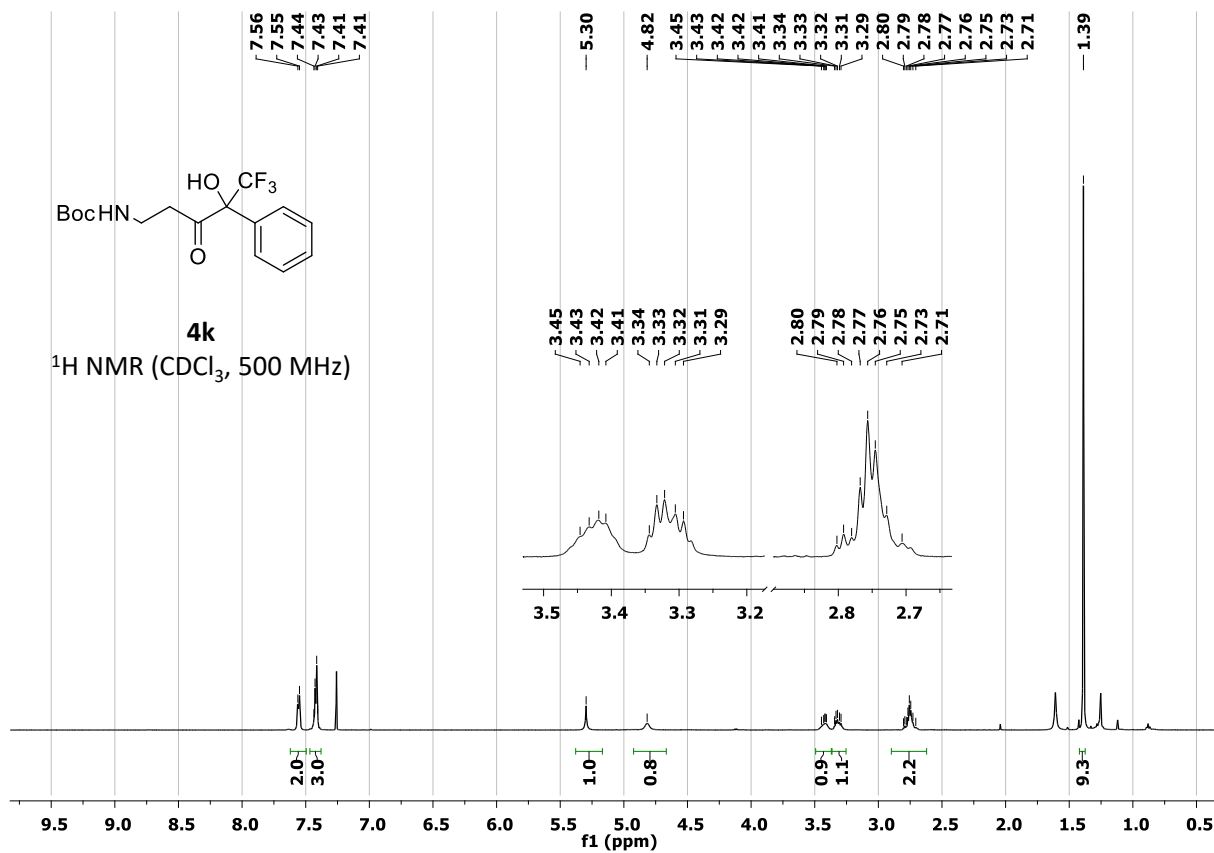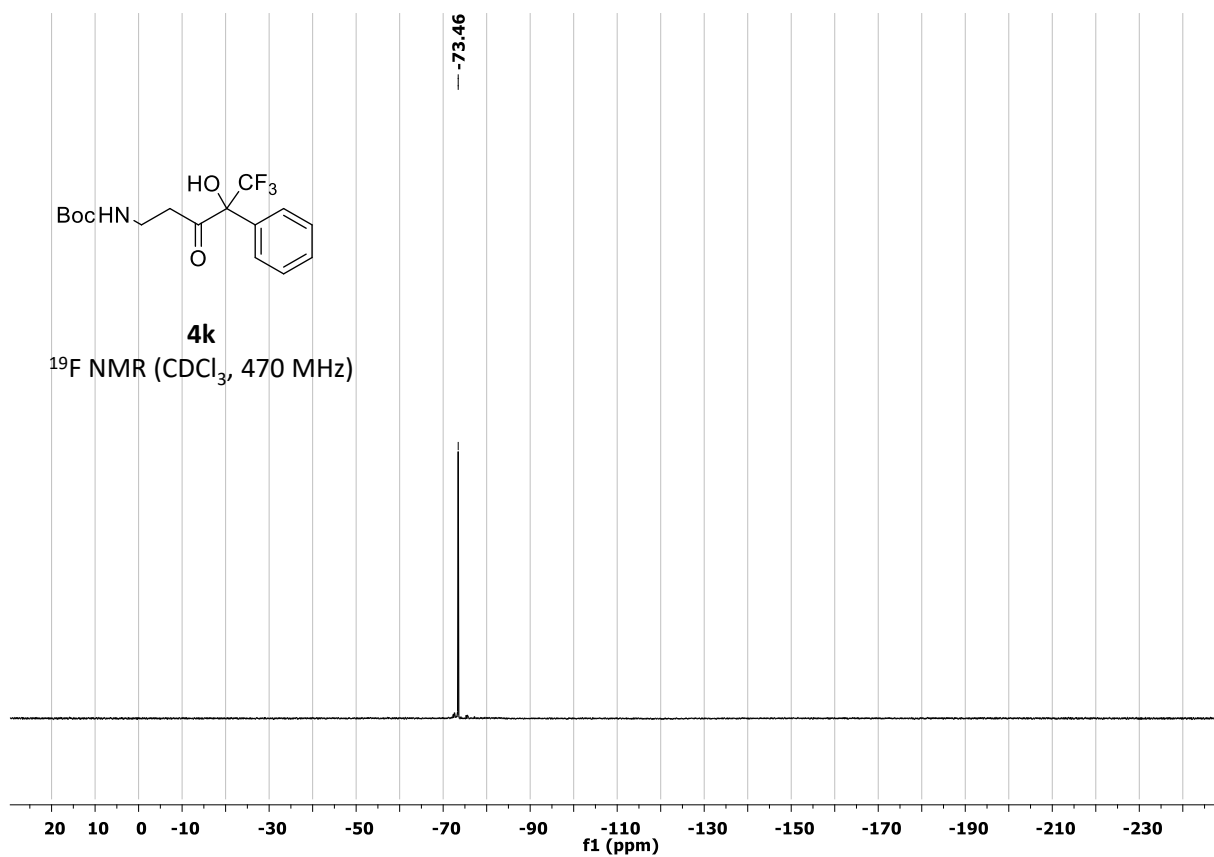

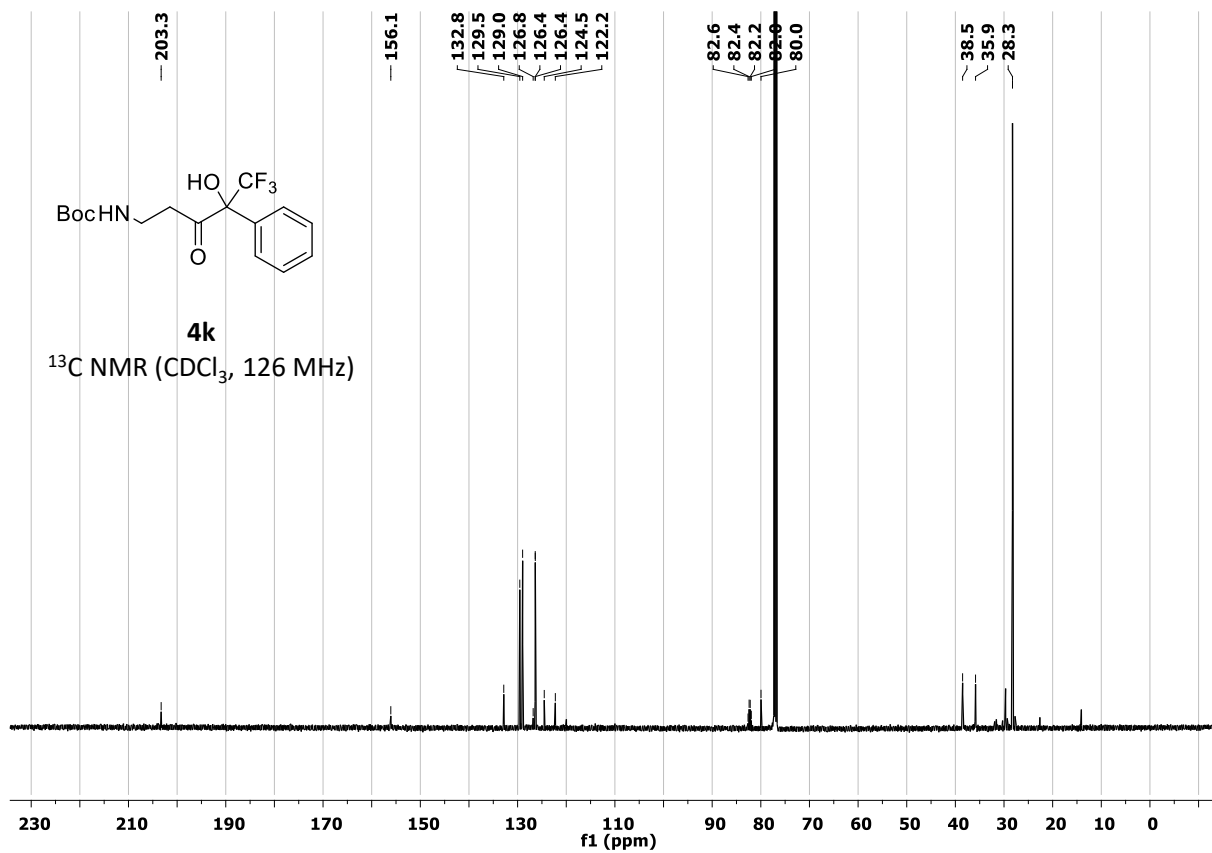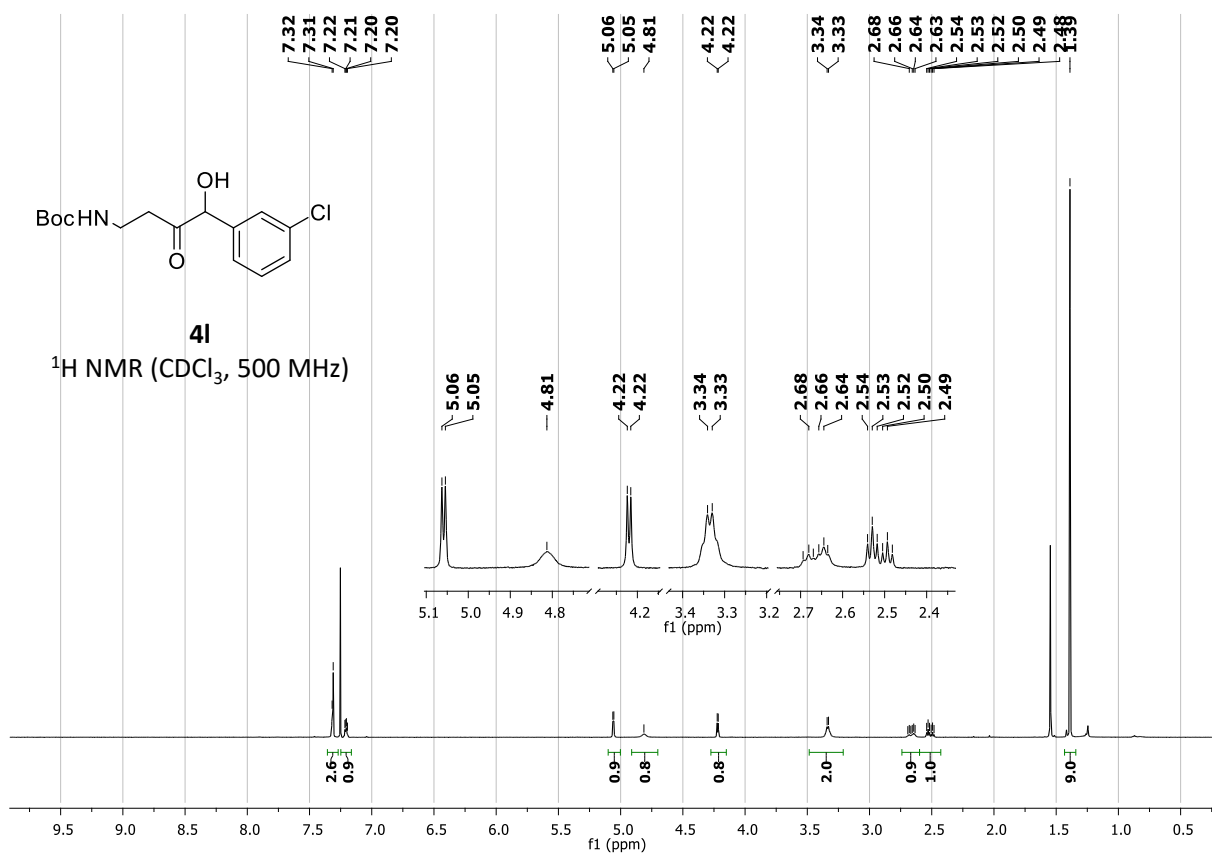

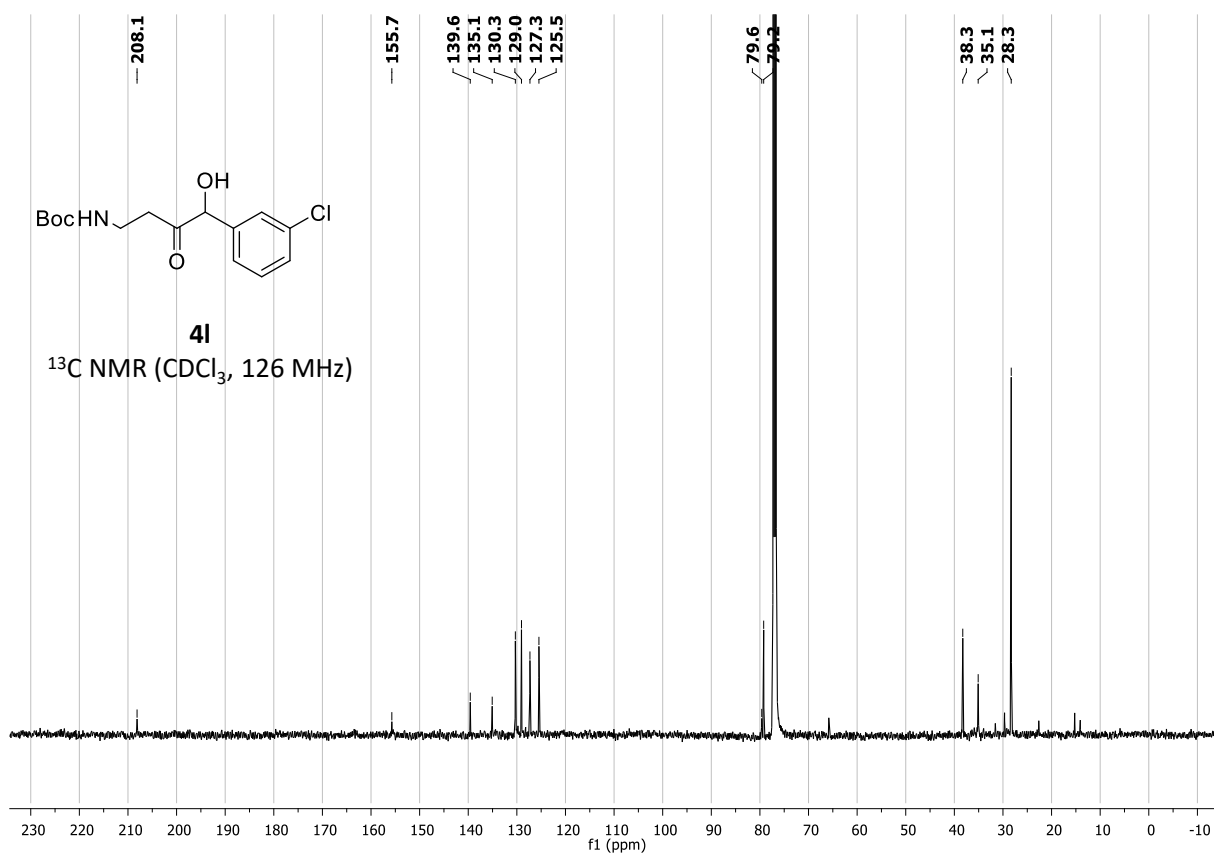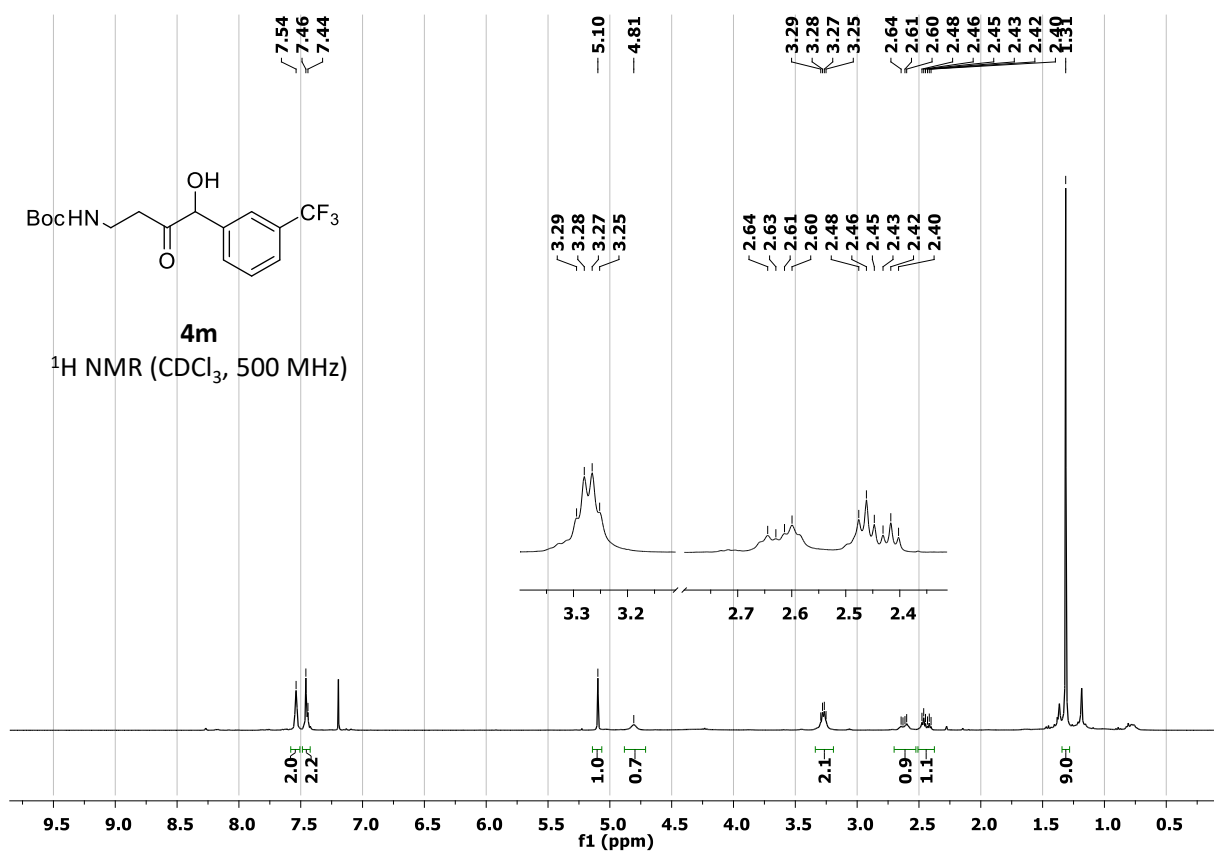

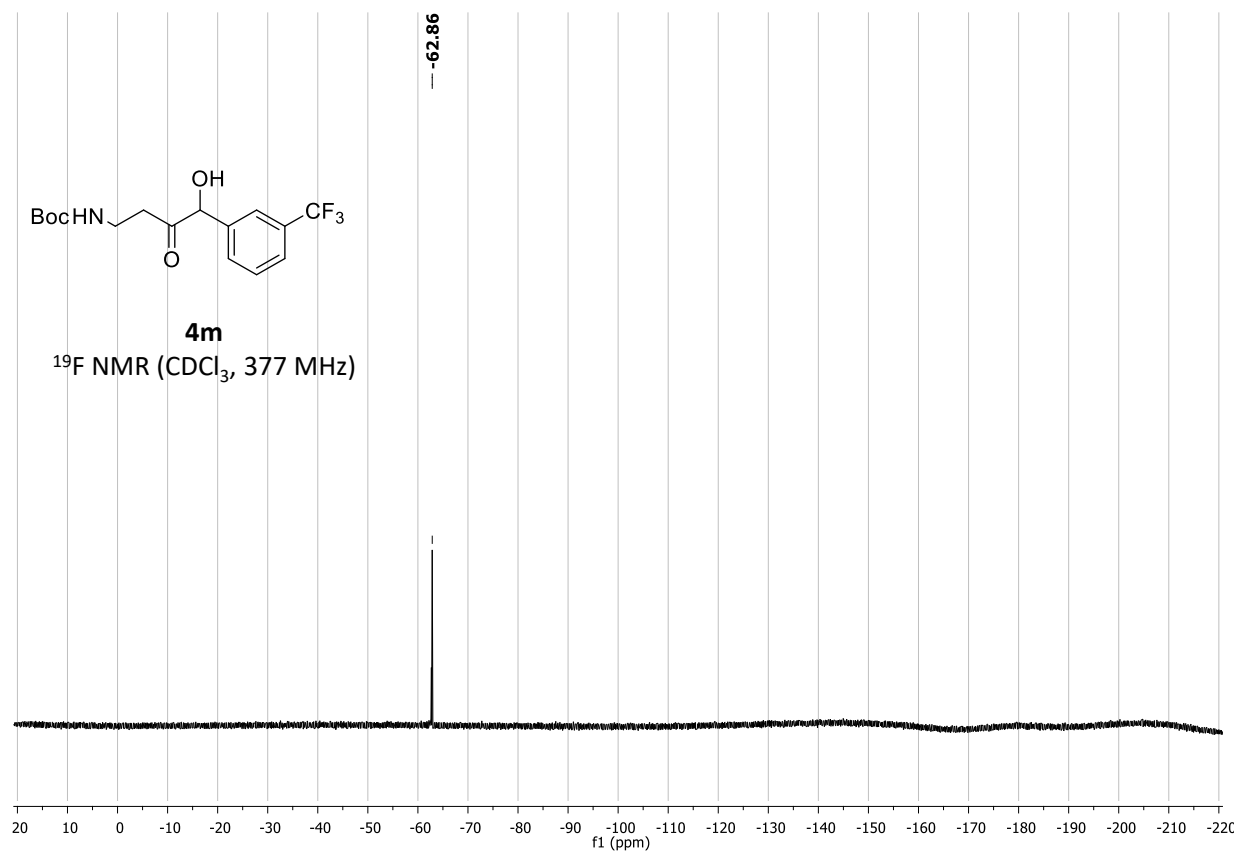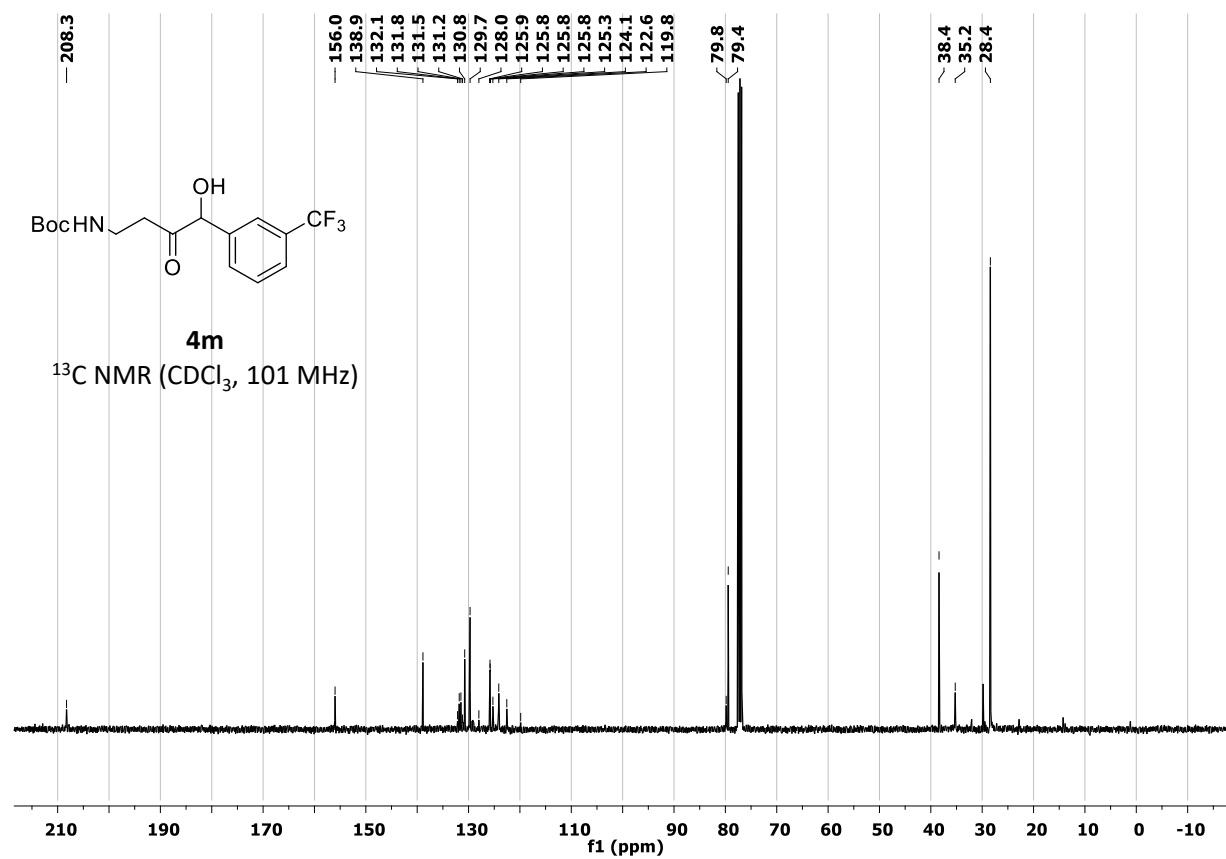

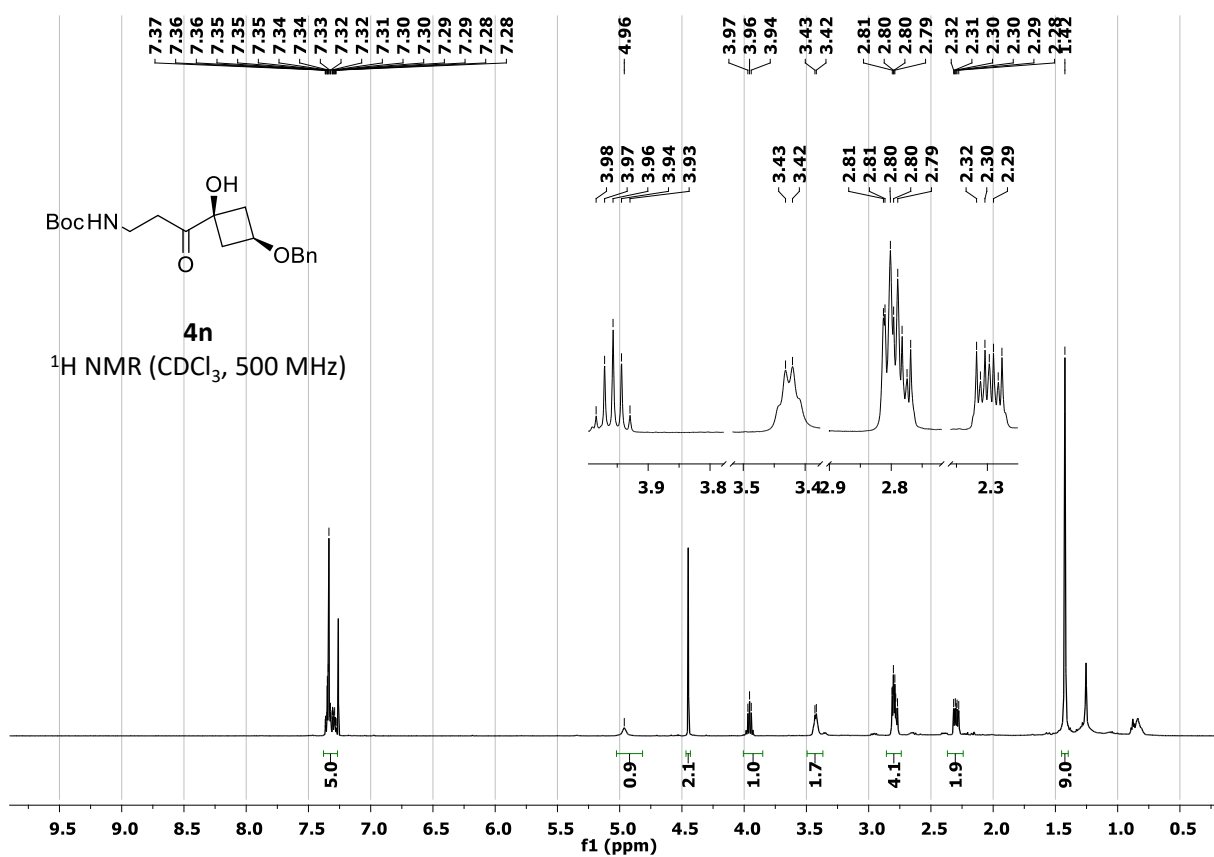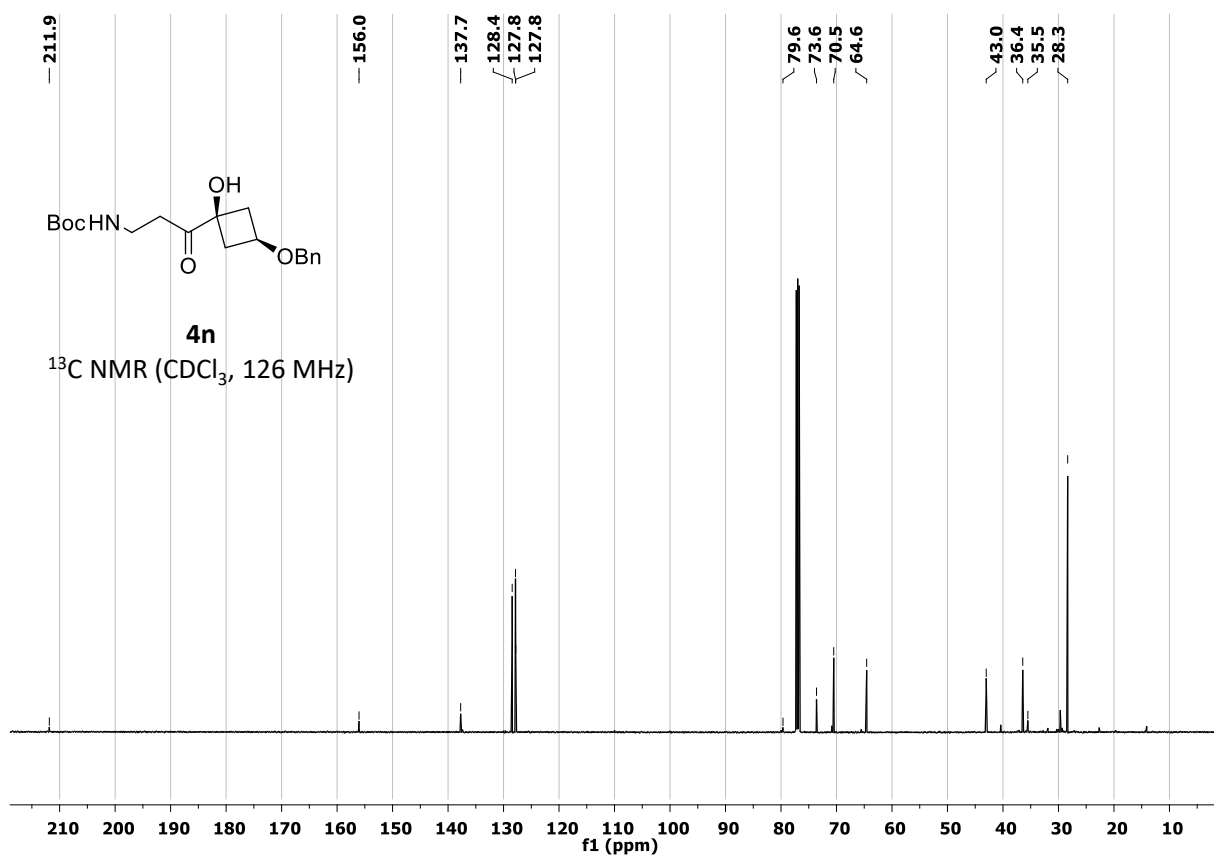



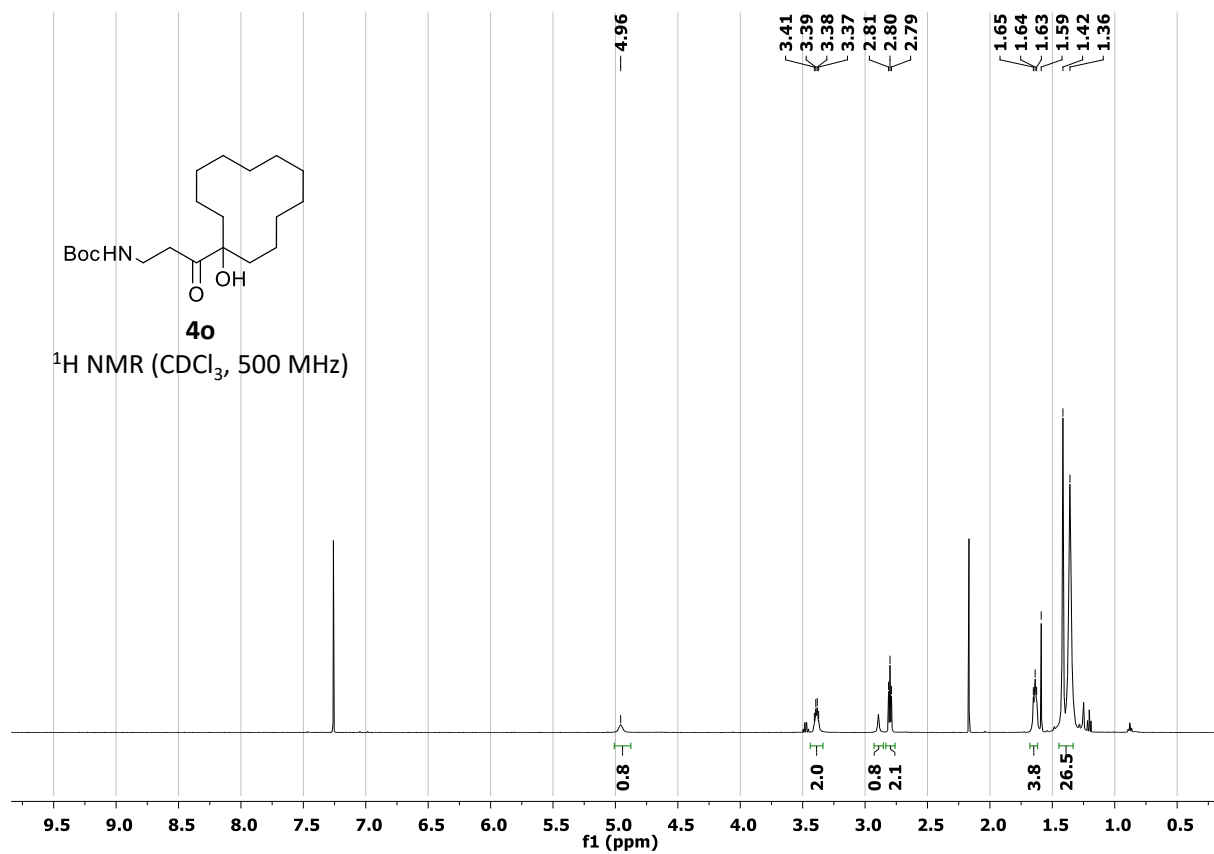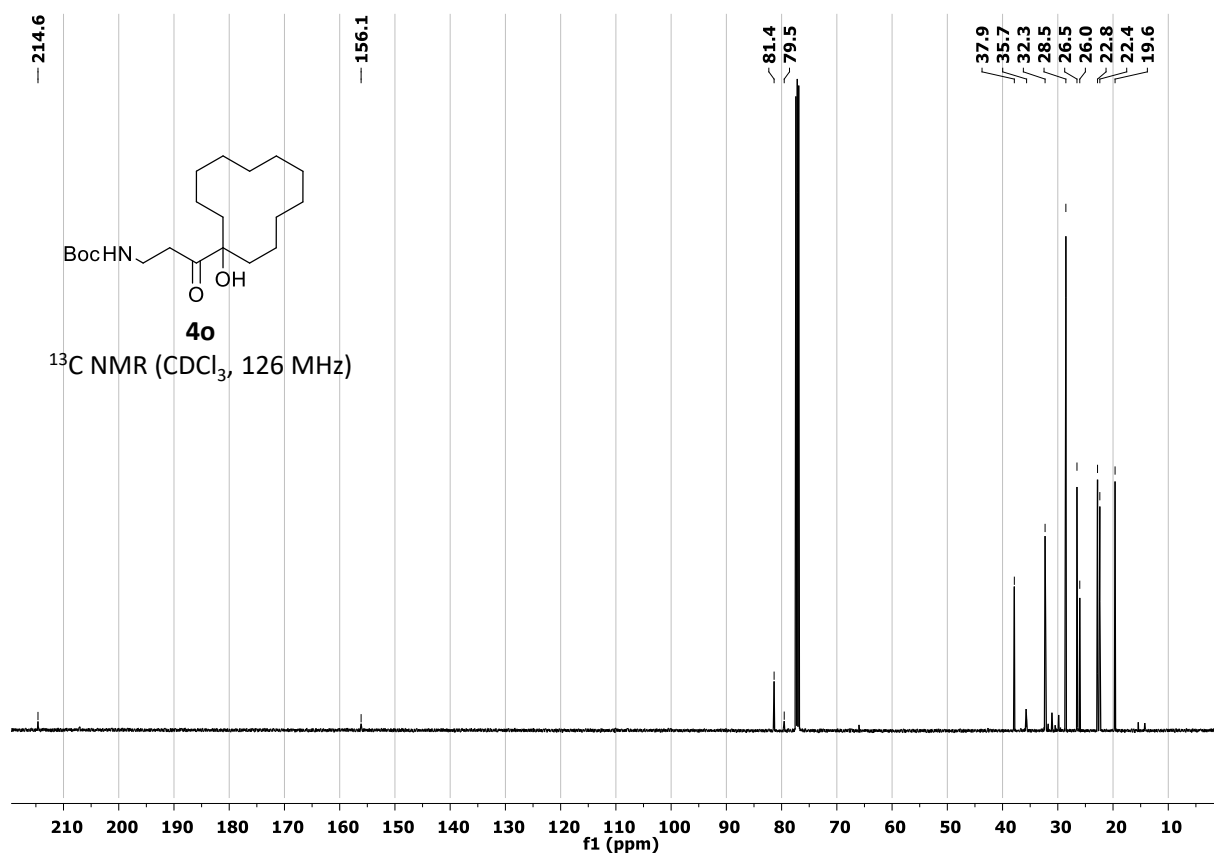

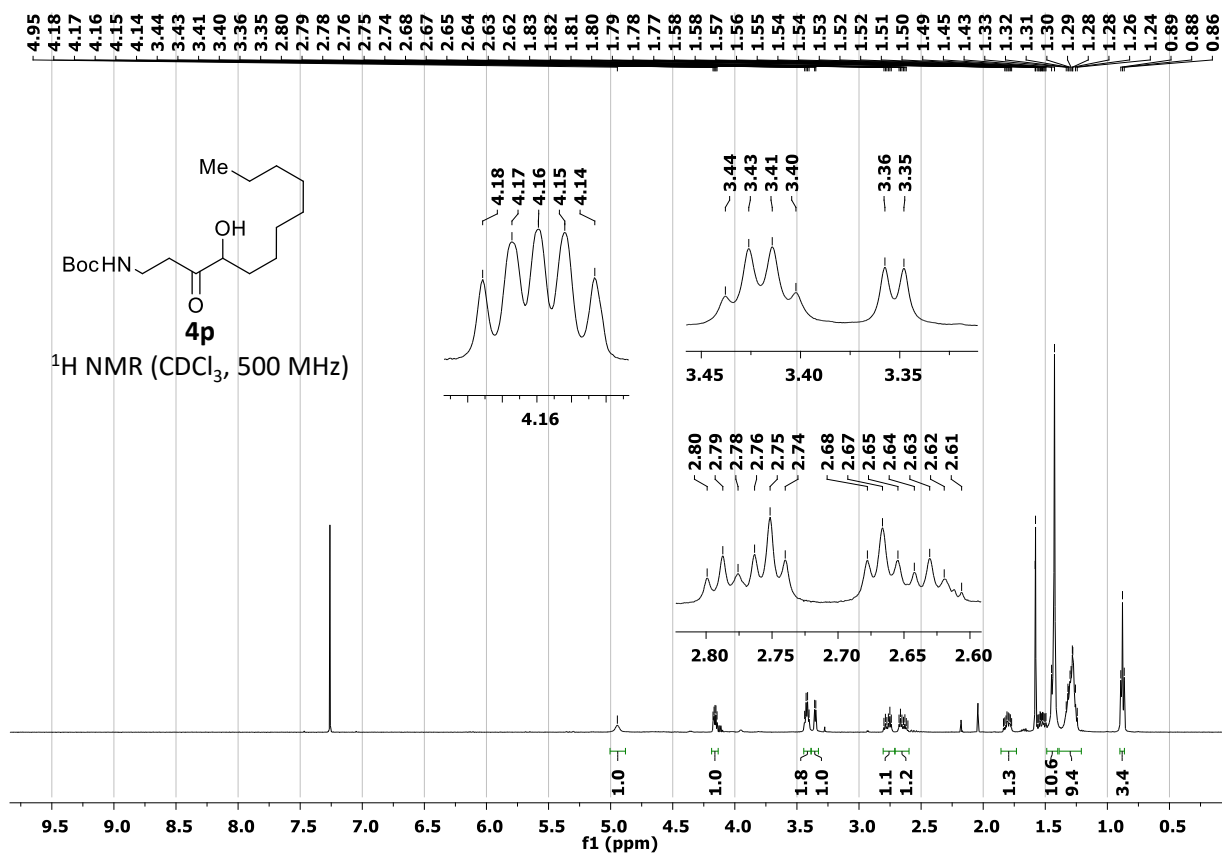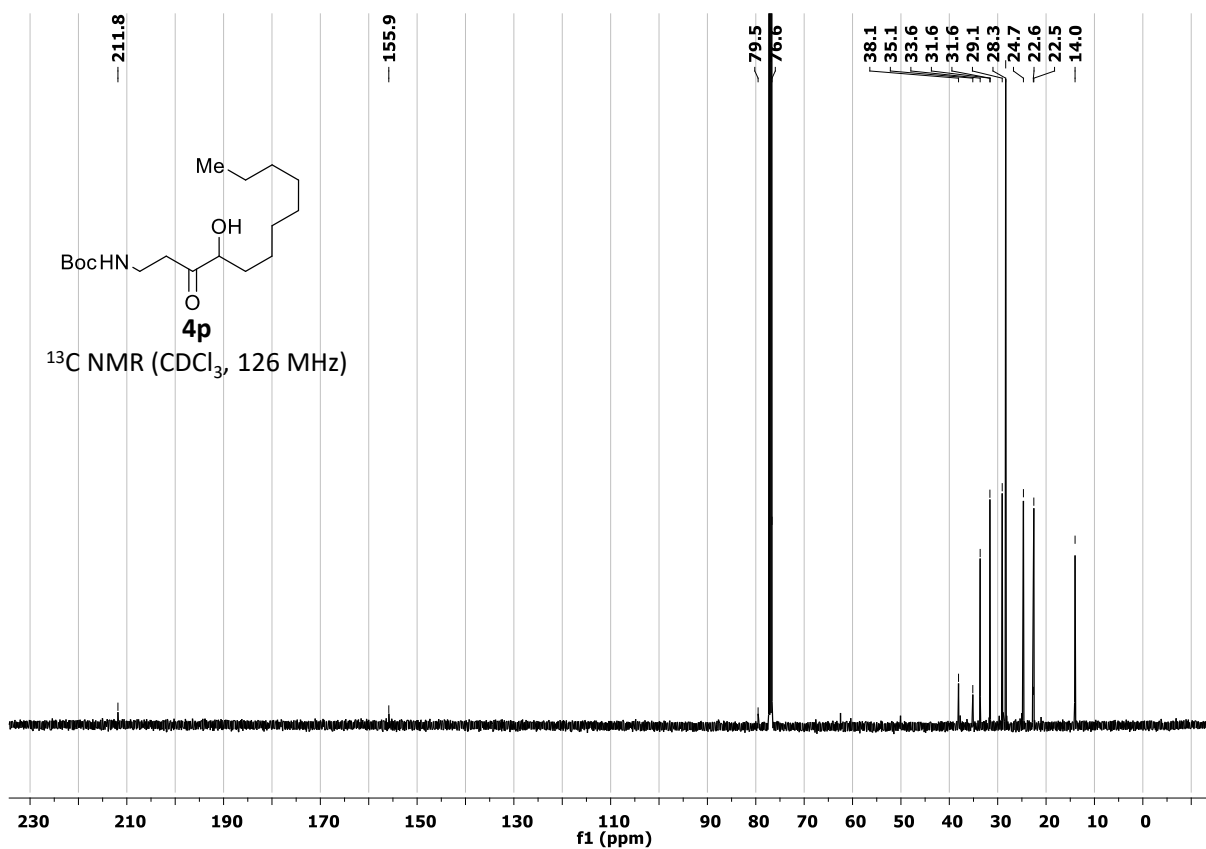

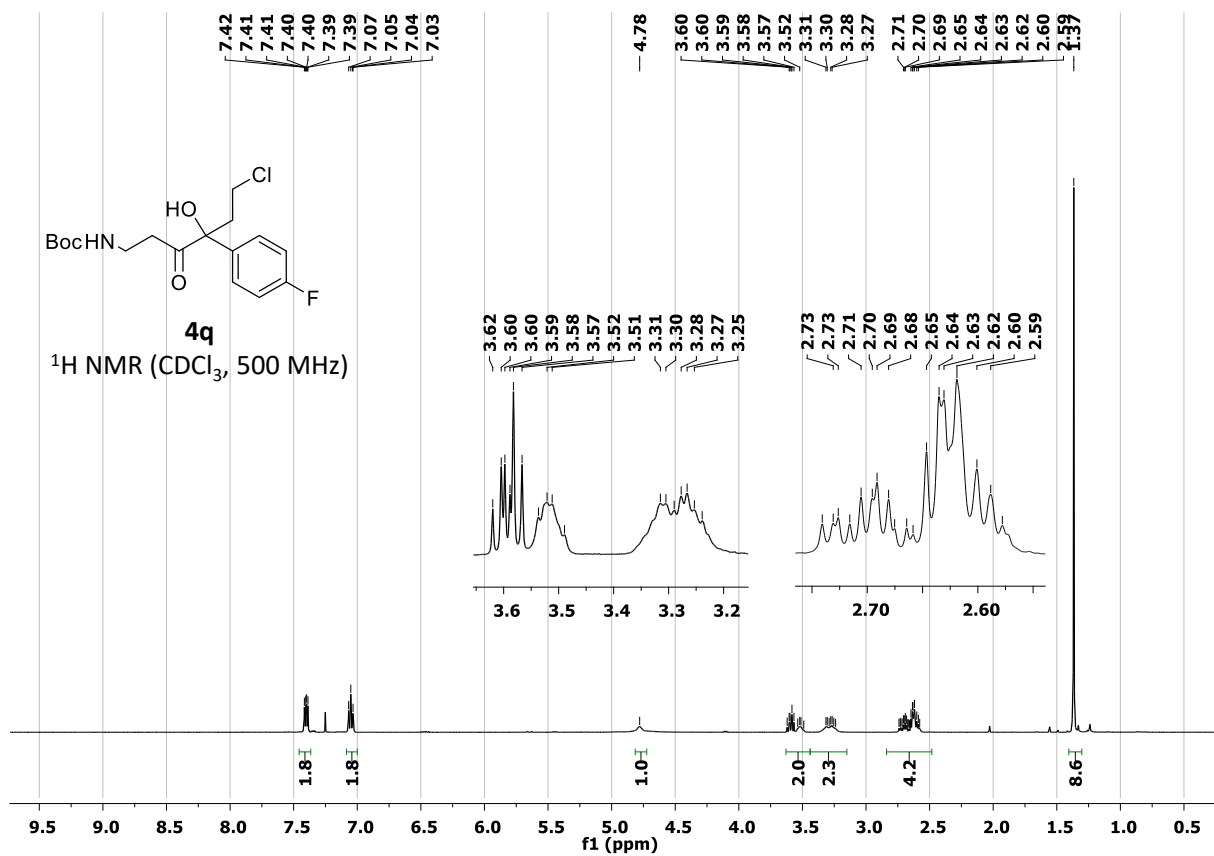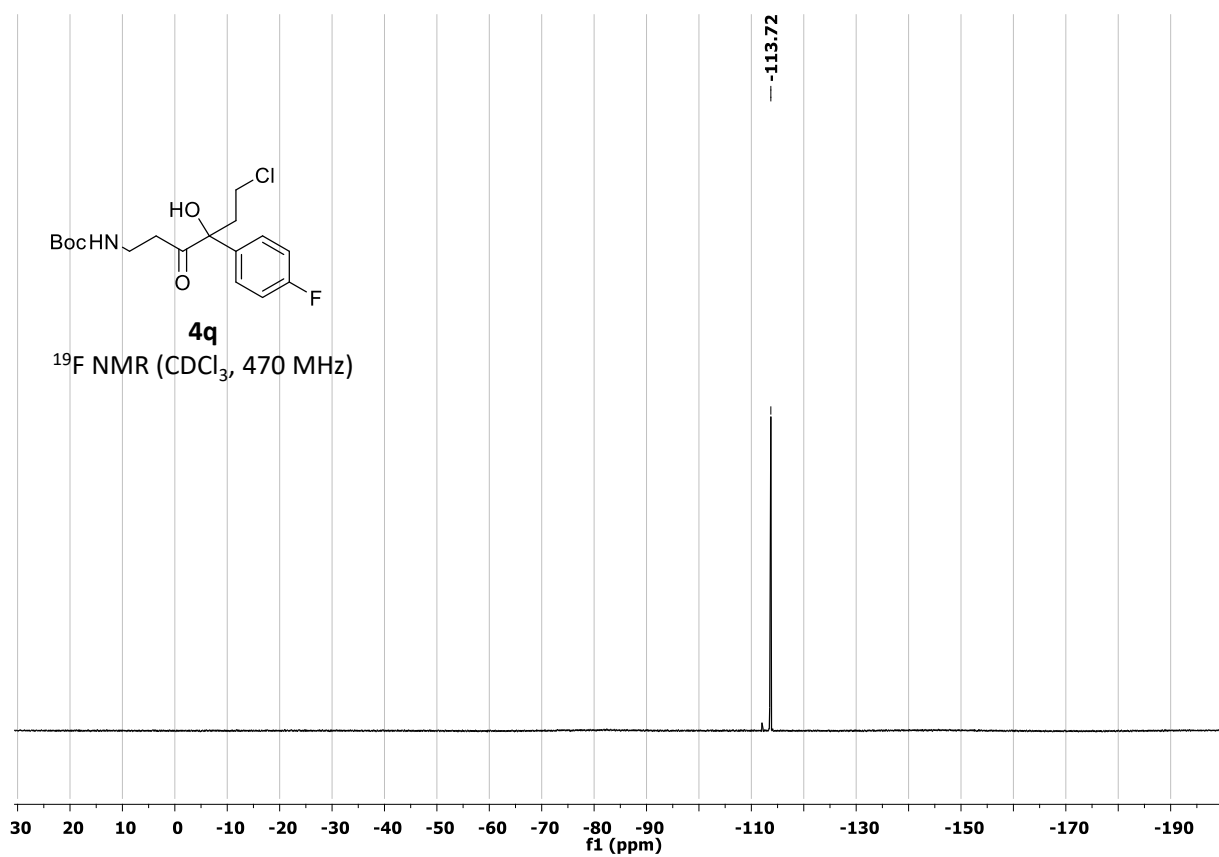

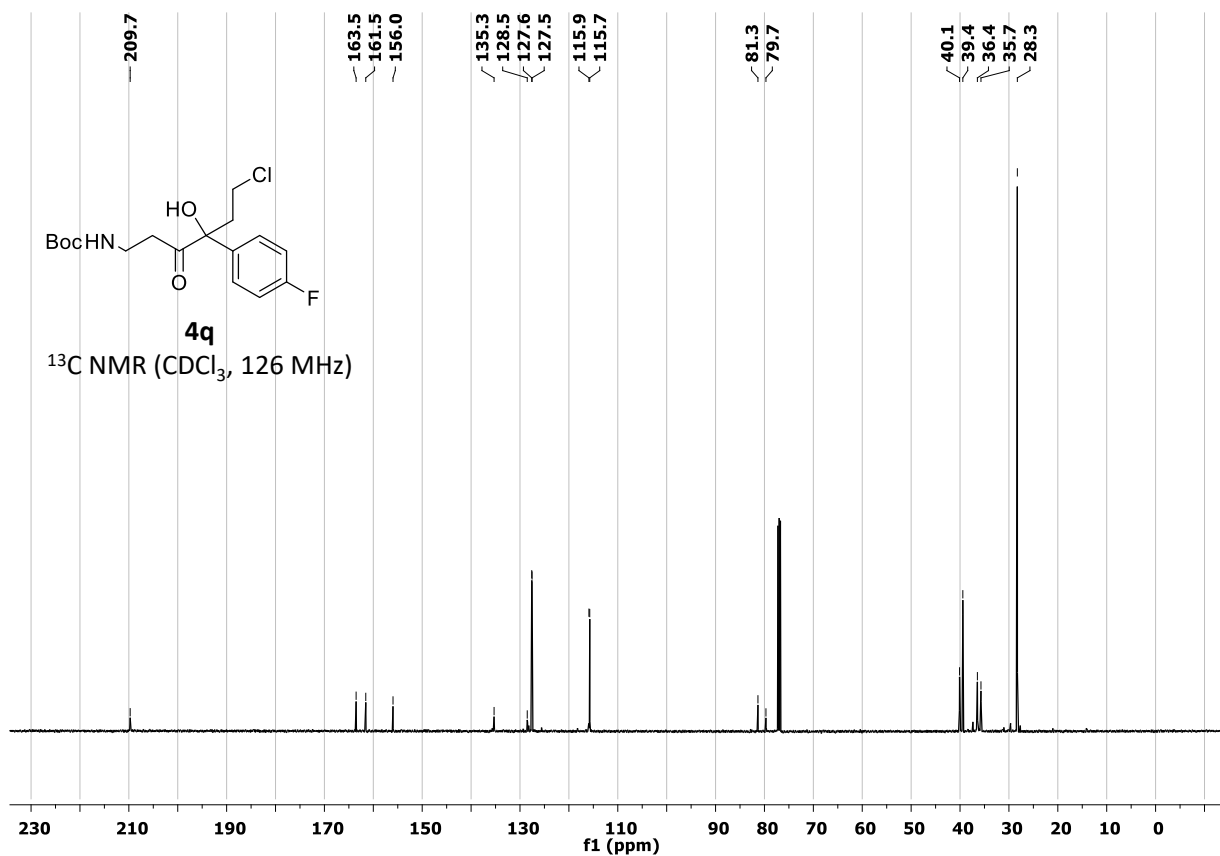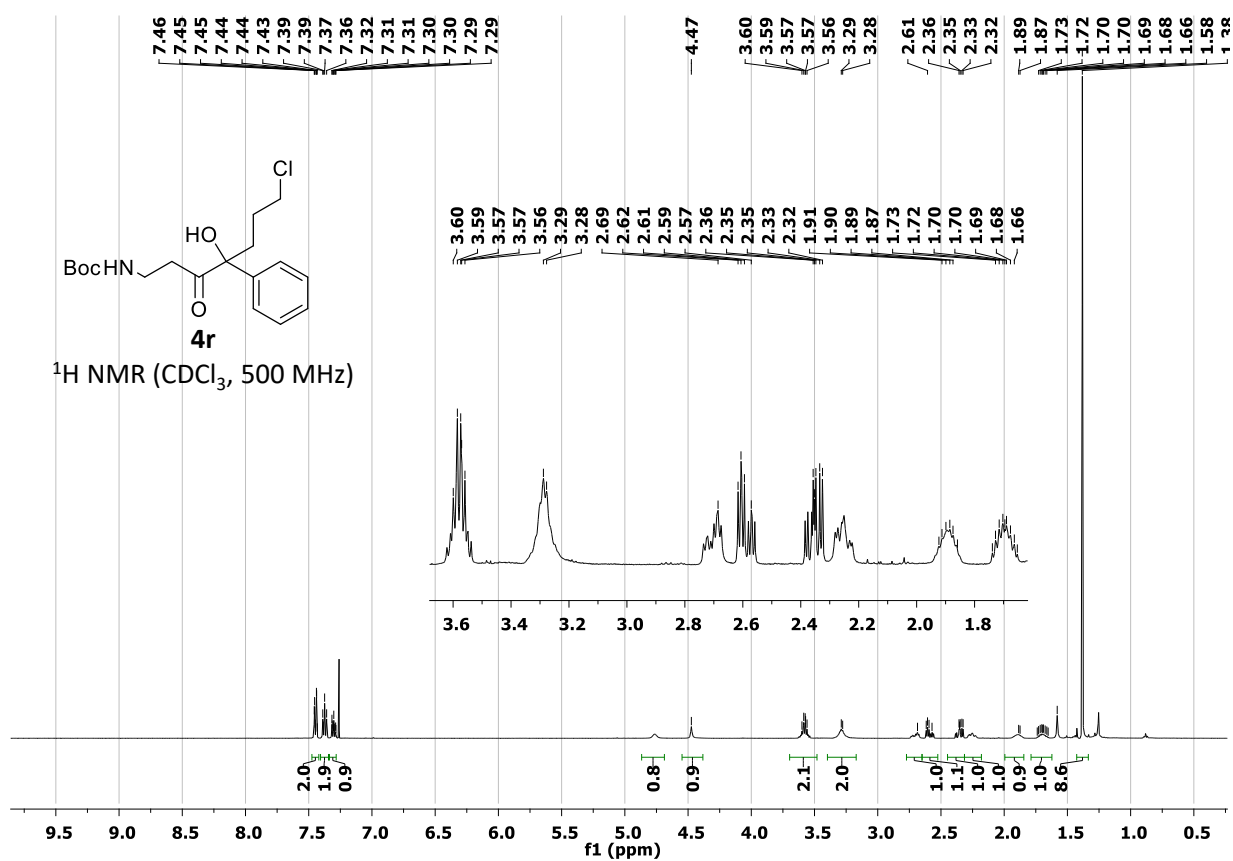

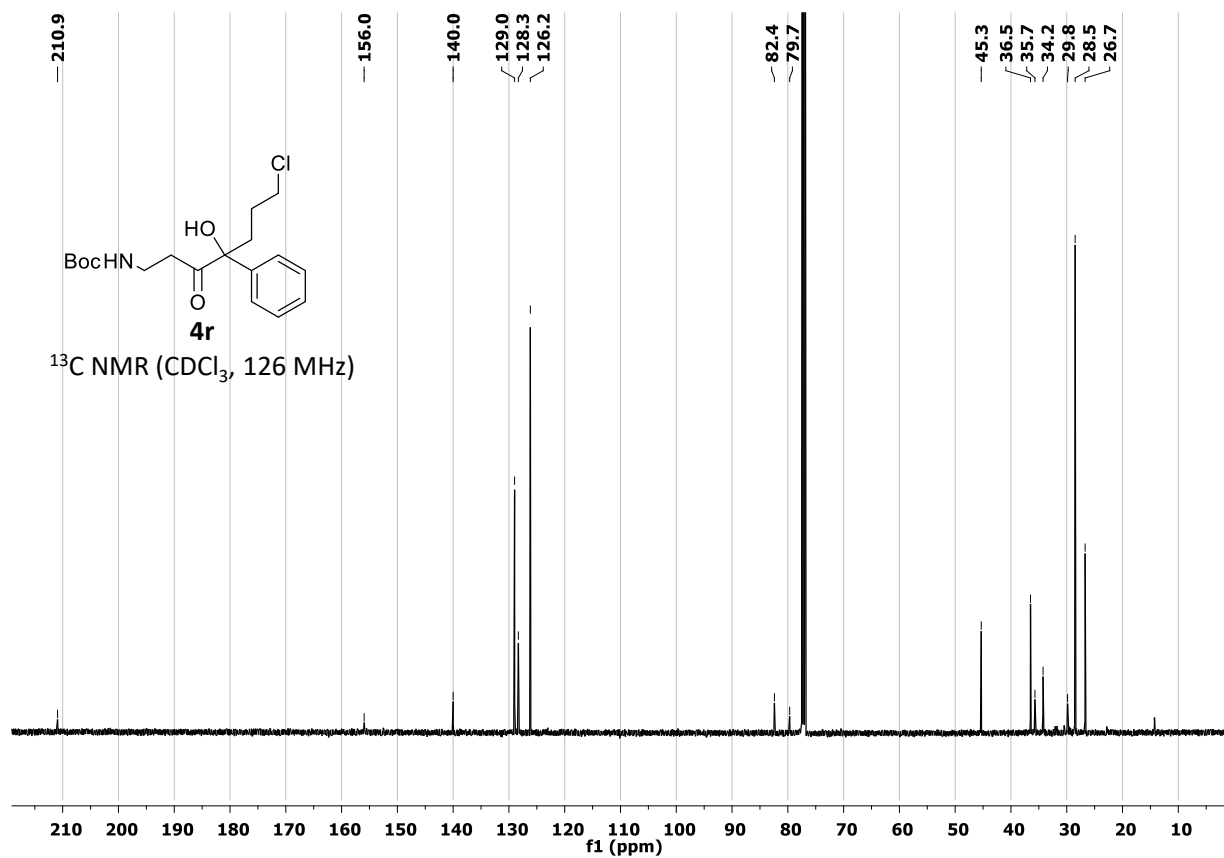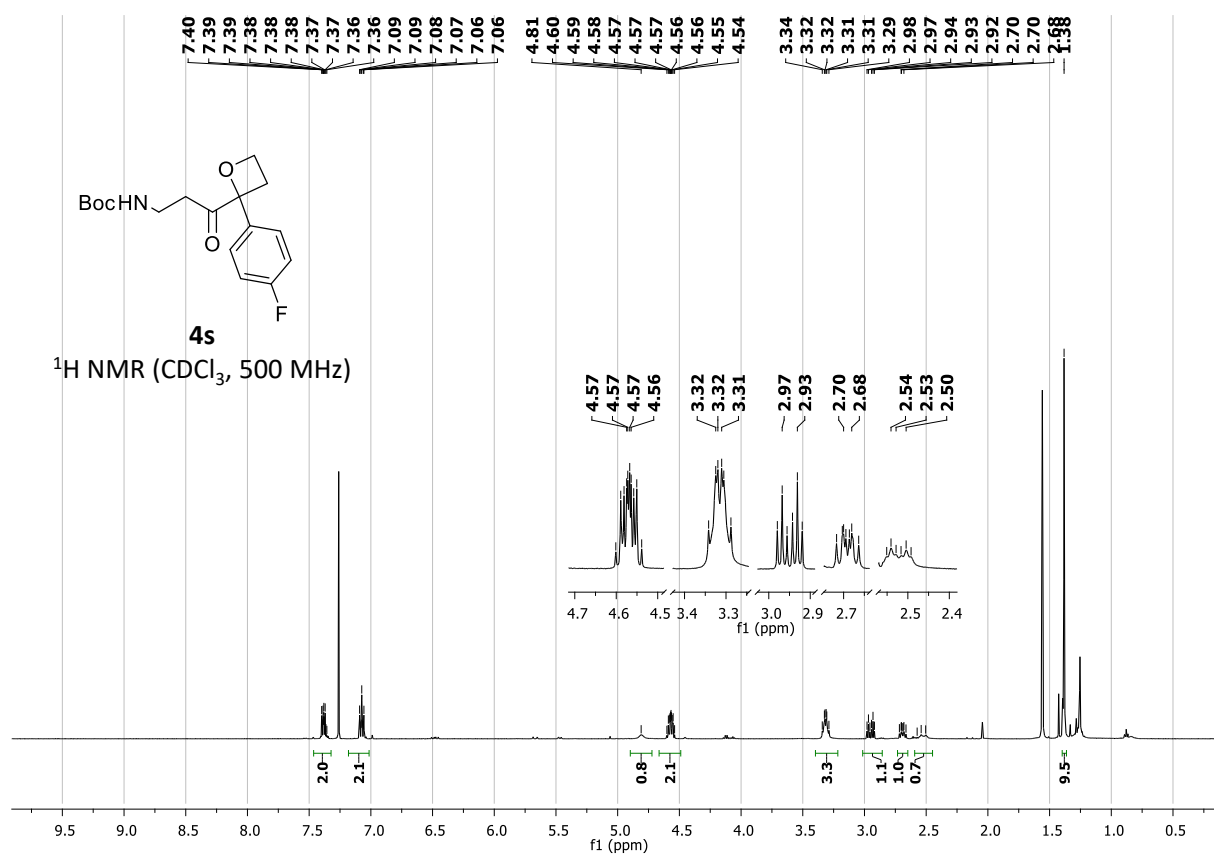

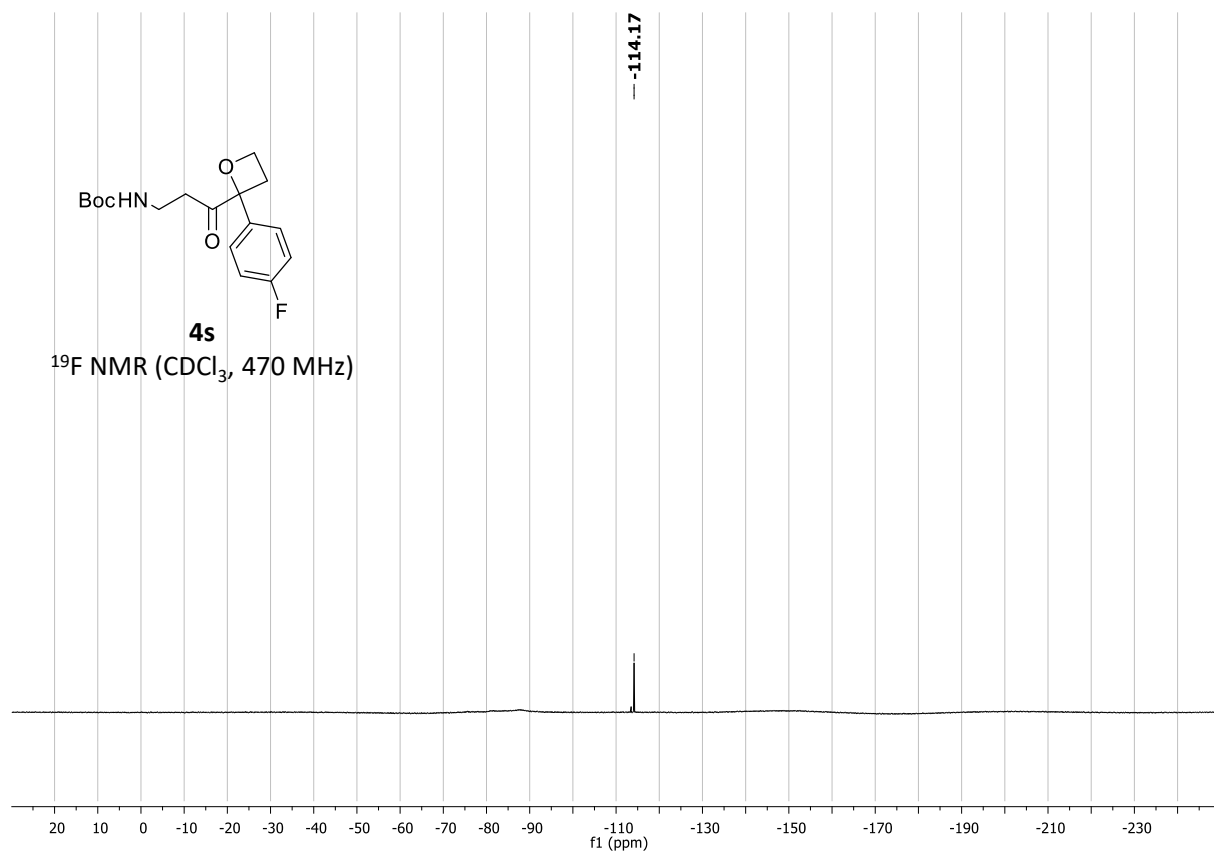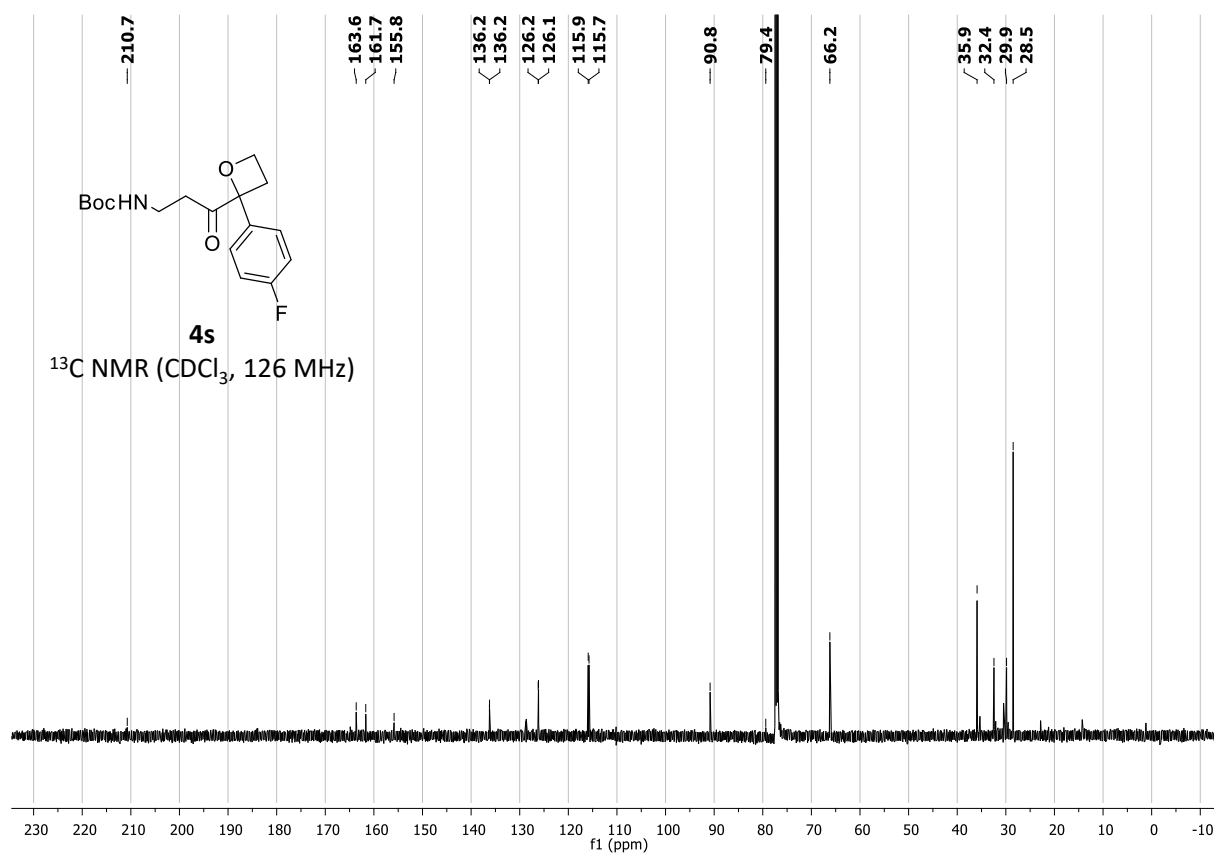

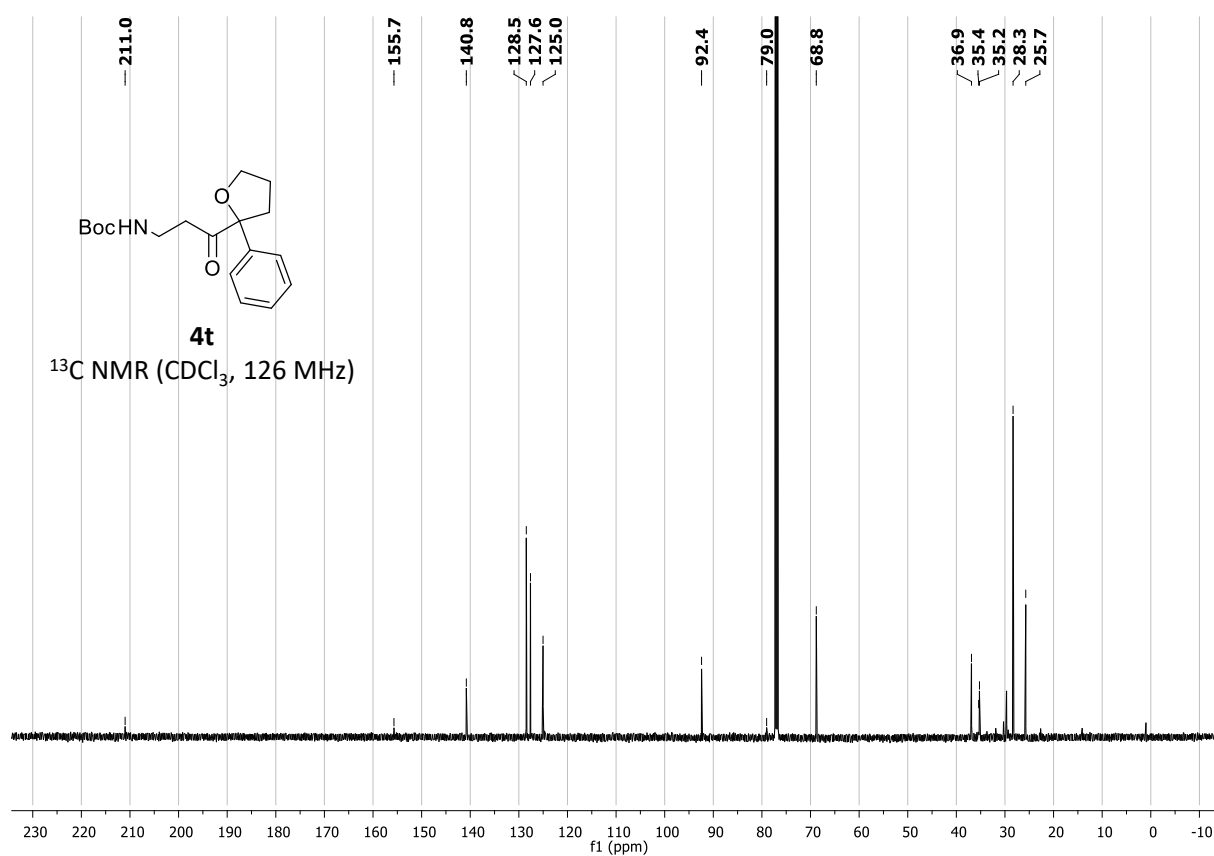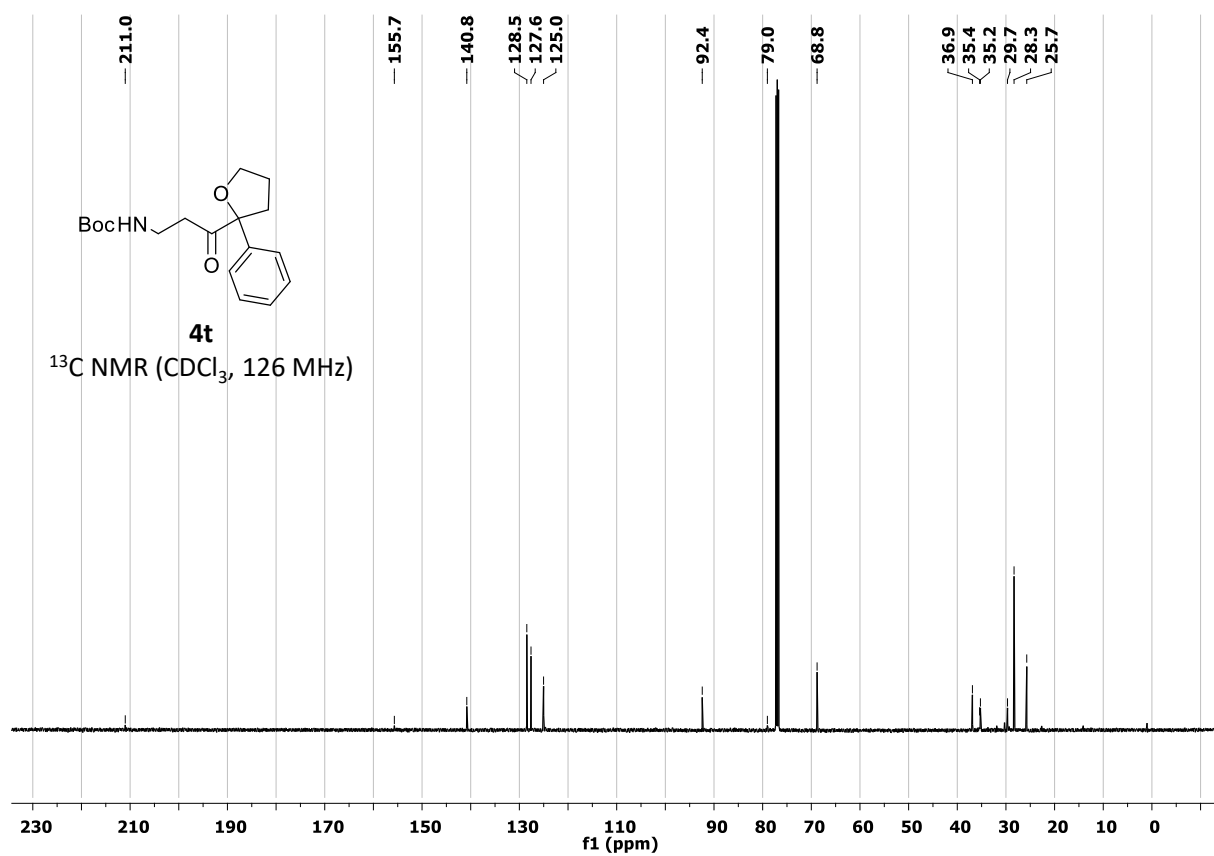

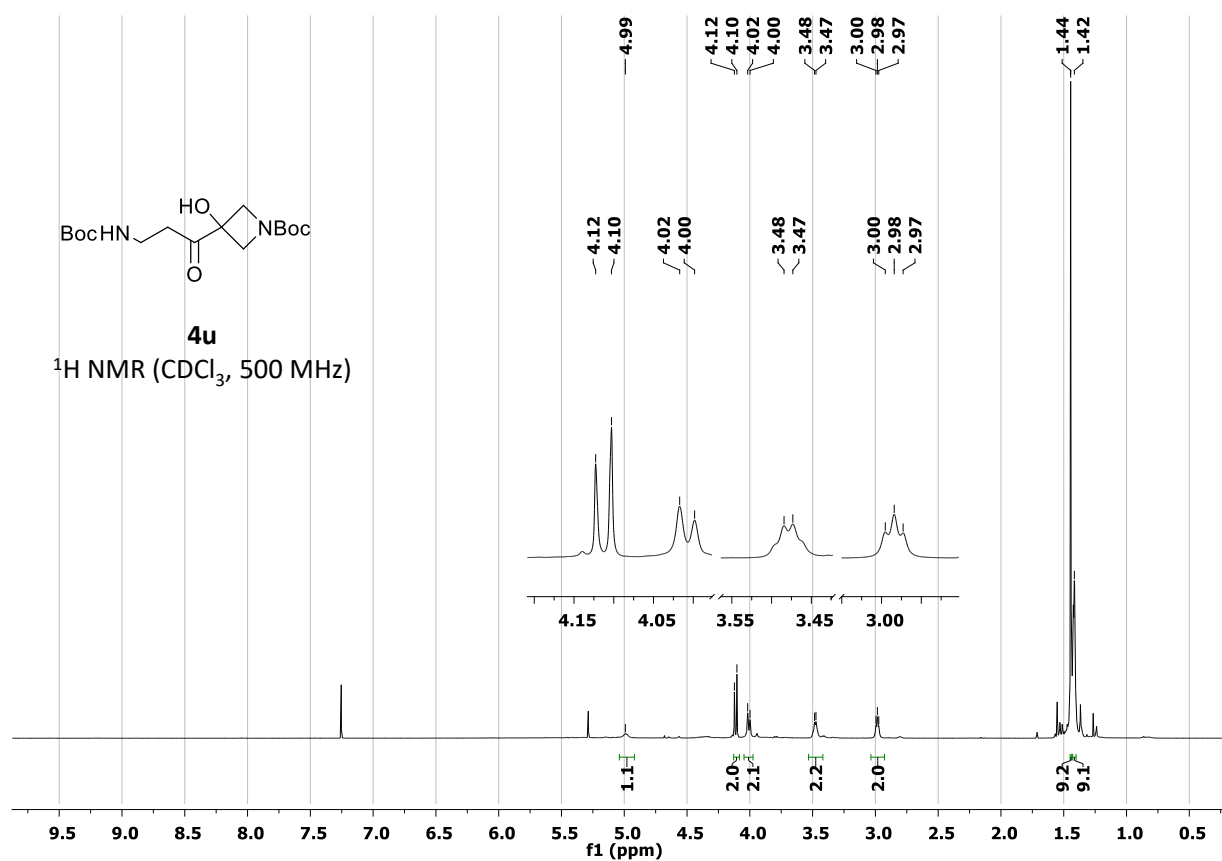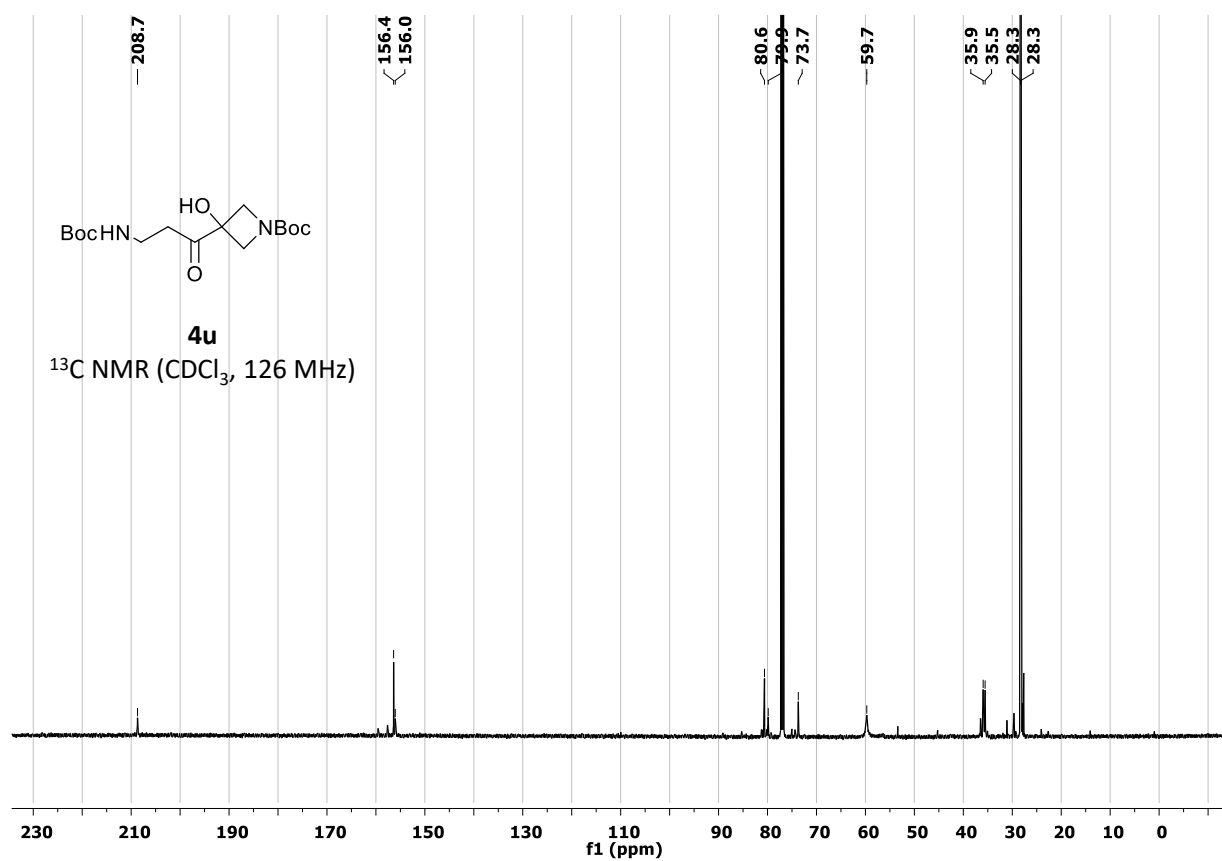



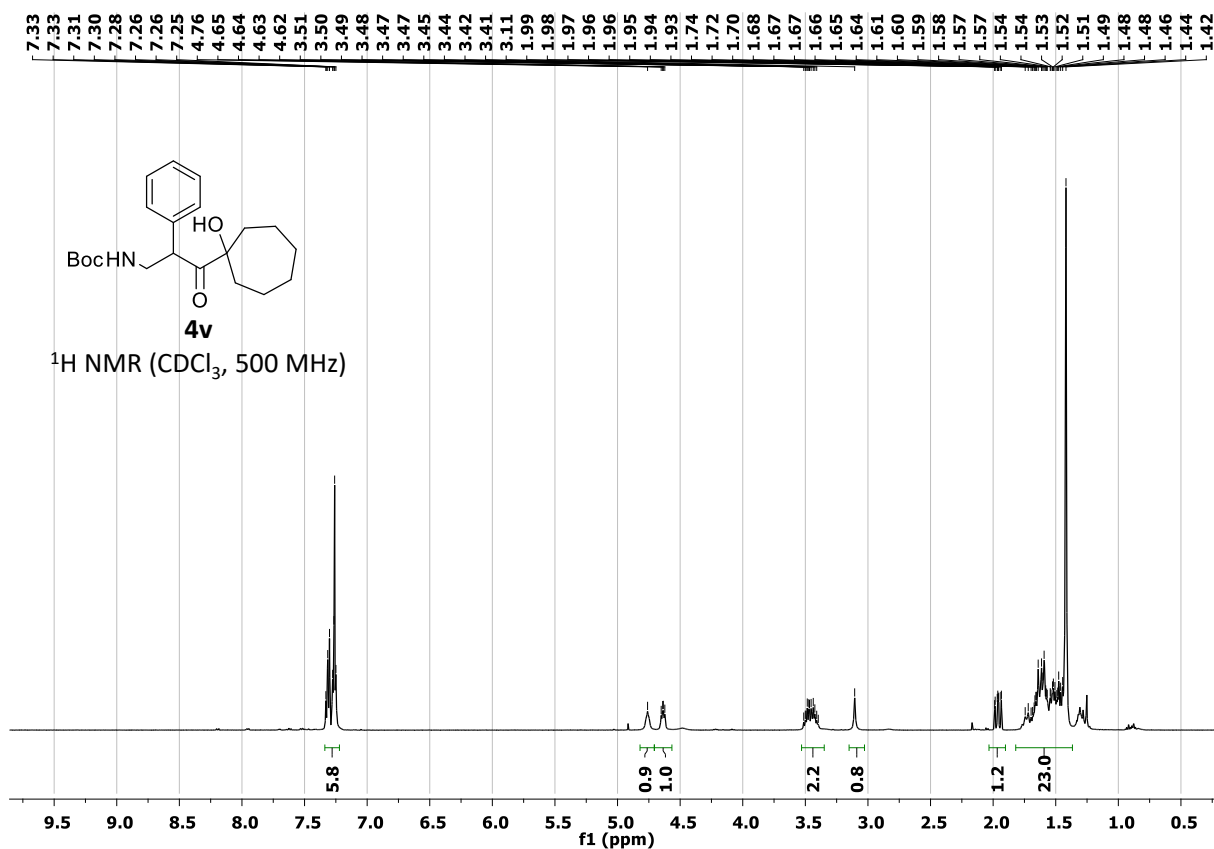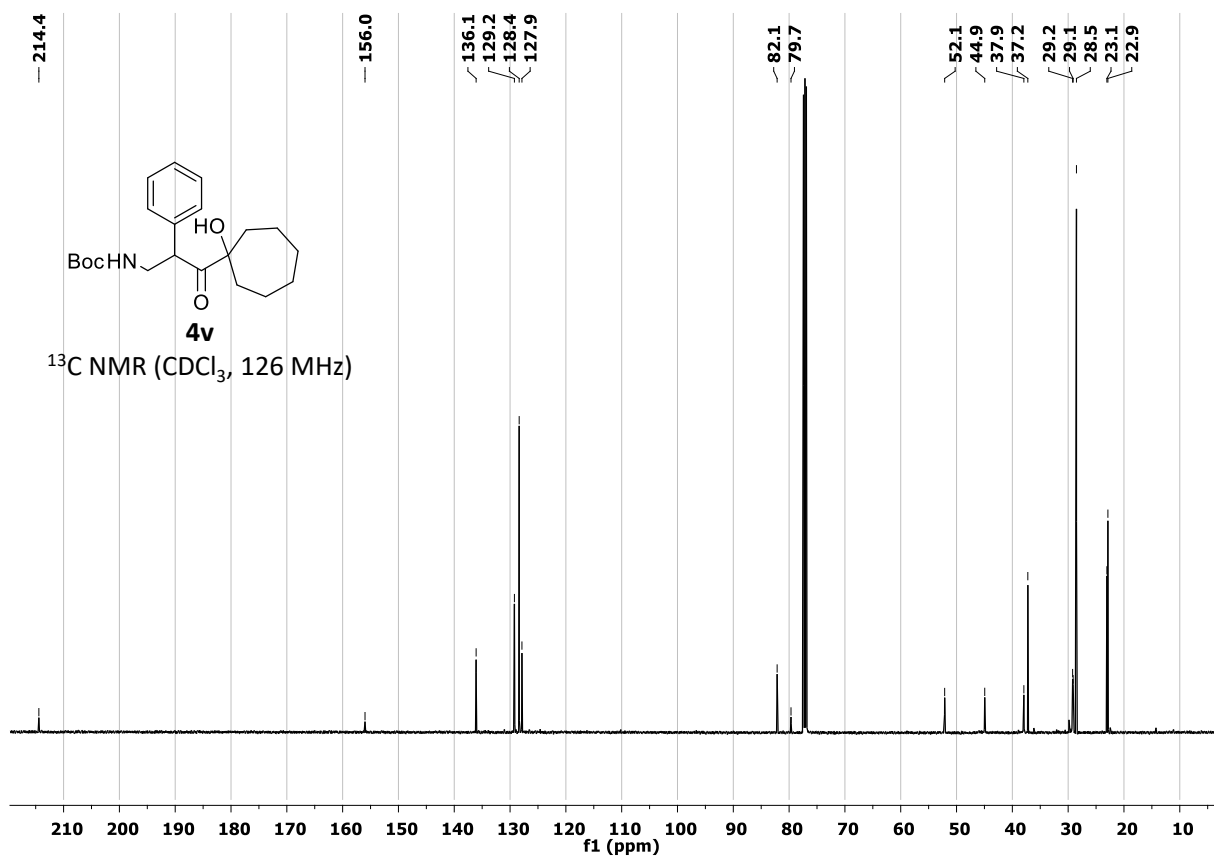

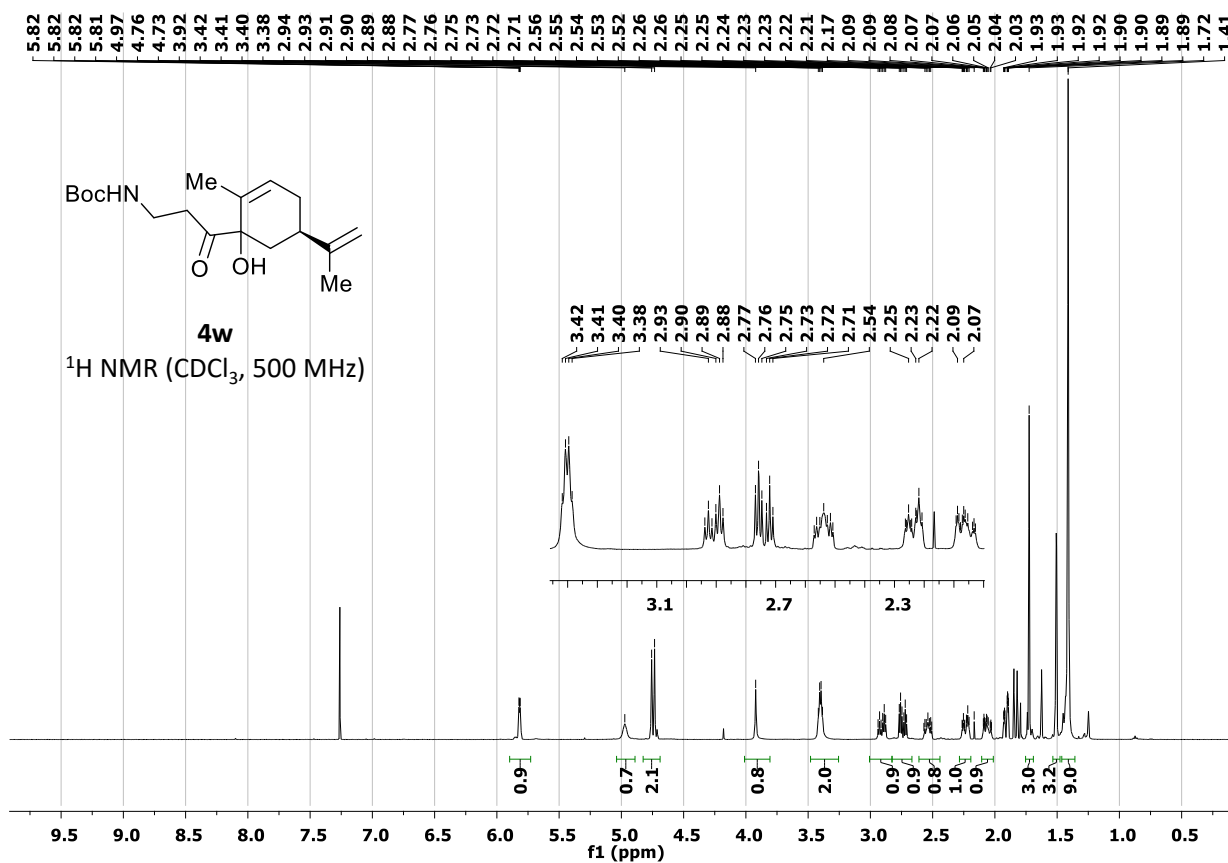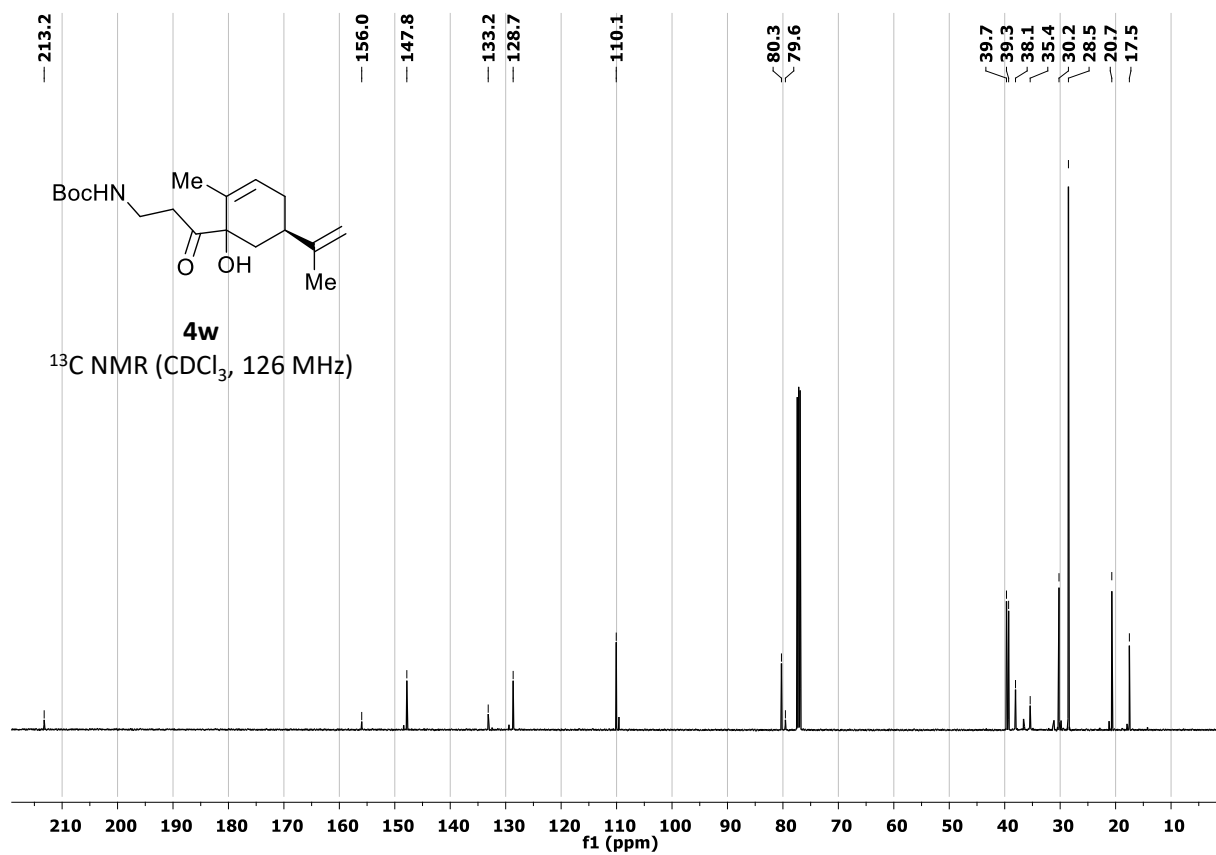

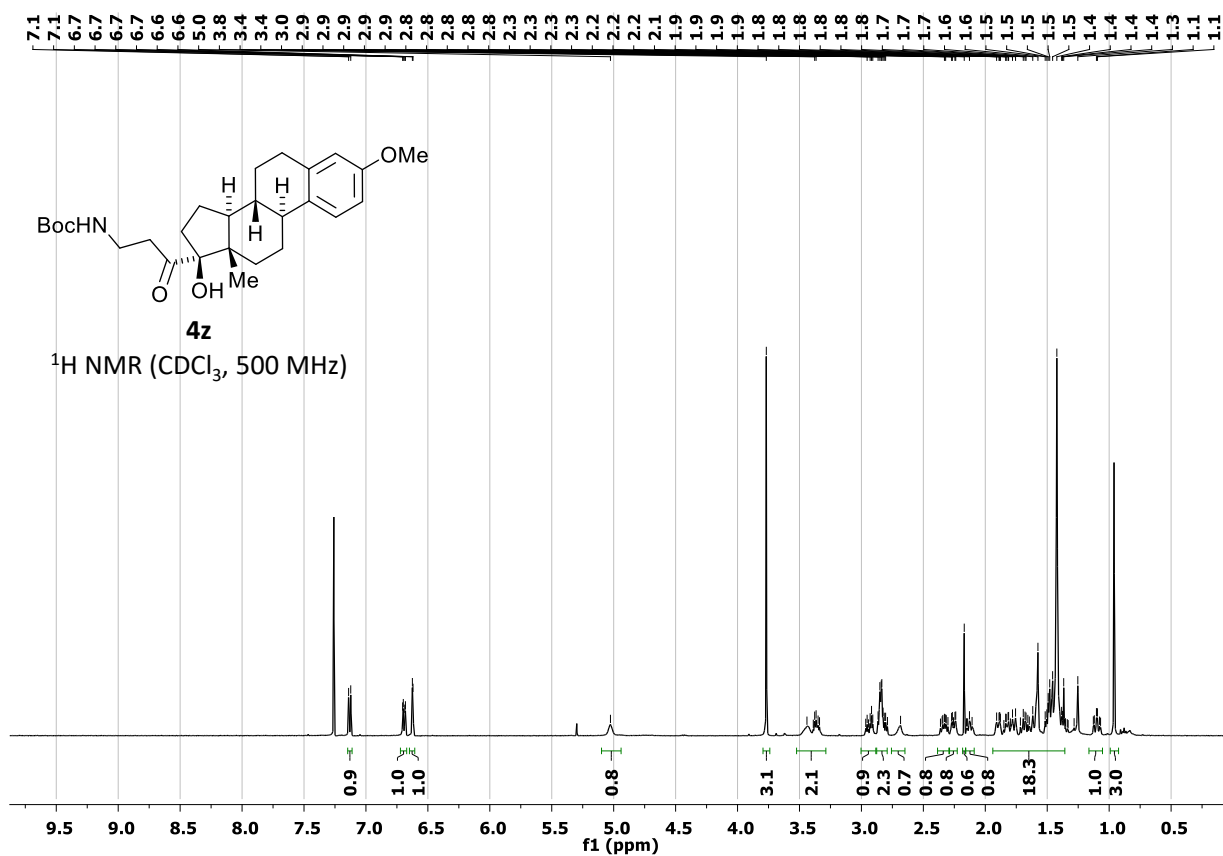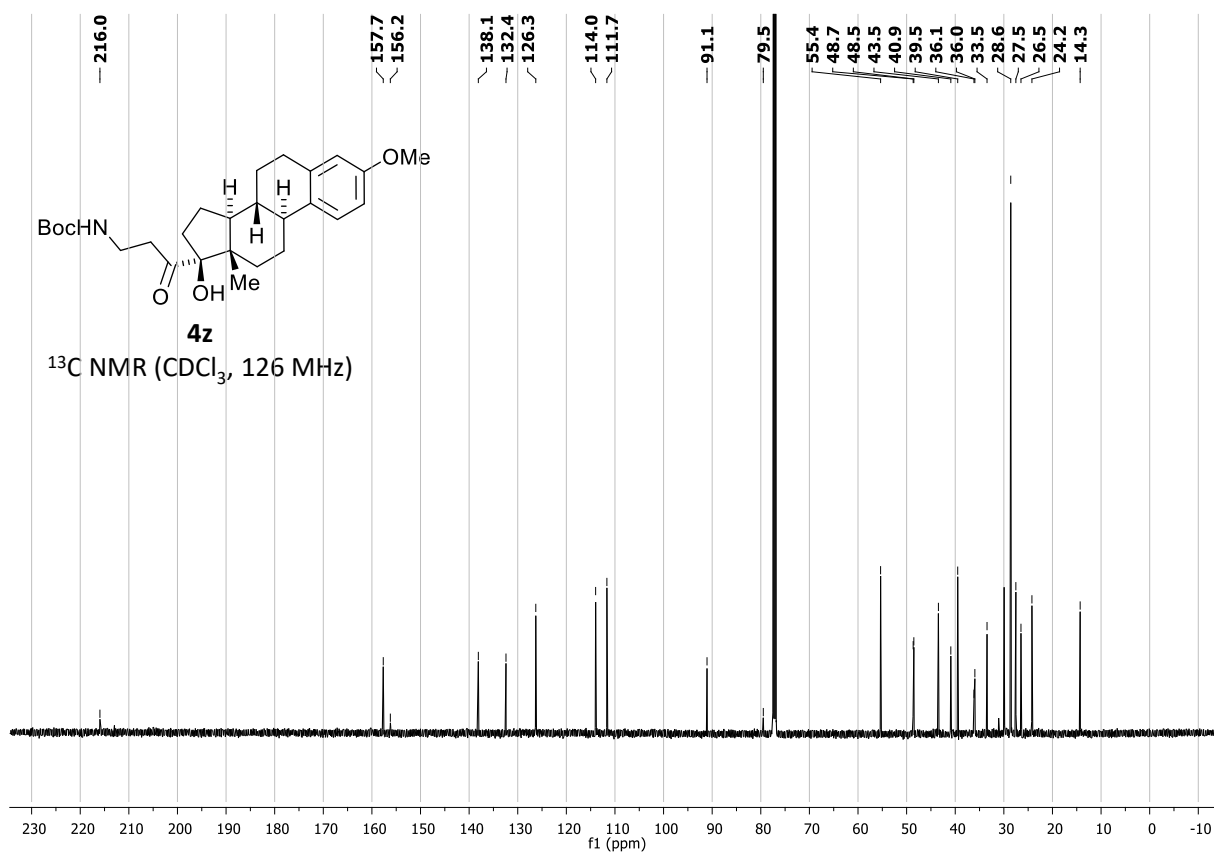

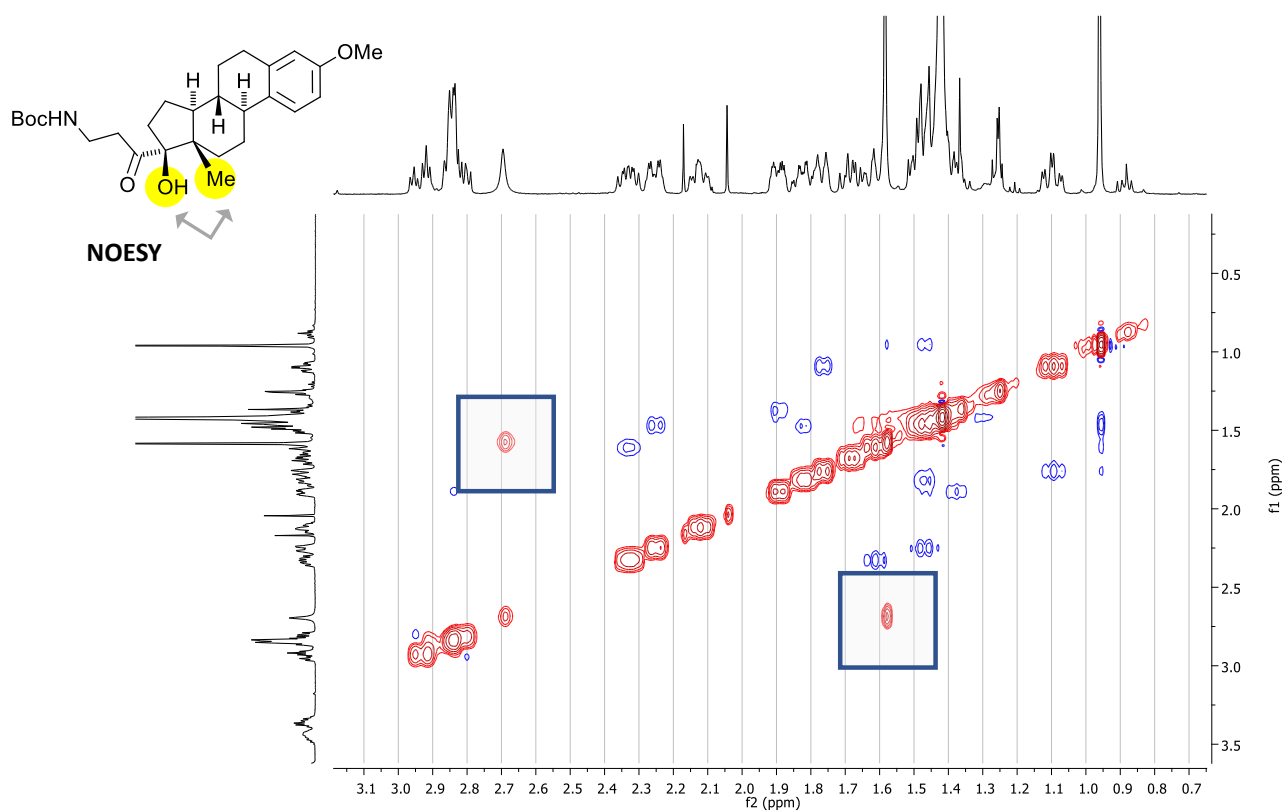

## References

- <sup>1</sup> D. M. Hodgson, C. I. Pearson and M. Kazmi *Org. Lett.* **2014**, *16*, 856-859.
- <sup>2</sup> M. Colella, P. Musci, D. Cannillo, M. Spennacchio, A. Aramini, L. Degennaro and R. Luisi *J. Org. Chem.* **2021**, *86*, 13943-13954.
- <sup>3</sup> 3-methoxy-3-phenylazetidine-1-carboxylate was prepared according to a procedure reported here: A. N. Baumann, M. Eisold, A. Music, G. Haas, Y. M. Kiw and D. Didier *Org. Lett.* **2017**, *19*, 5681-5684,
- <sup>4</sup> E. Graziano, D. Cannillo, M. Spennacchio, P. Musci, L. Pisano, M. Andresini, M. Colella, *Tetrahedron Green Chem*, **2023**, *1*, 100003. <https://doi.org/10.1016/j.tgchem.2023.100003>.
- <sup>5</sup> J. Andraos and A. Hent, *J. Chem. Educ.*, **2015**, *92*, 1820-1830.
- <sup>6</sup> J. Andraos and M. Sayed, *J. Chem. Educ.*, **2007**, *84*, 1004.
